# Supplementary material for: Acute effect of dietary nitrate on forearm muscle oxygenation, blood volume and strength in older adults: A randomized clinical trial
Source: PubMed Central journal article supplement (PMC5708833; doi:10.1371/journal.pone.0188893), 2017-11-30

Normal Q-Q Plots of Standardized Residual for SmO<sub>2</sub> During Exercise

Normal Q-Q Plot of Standardized Residual for Pre

Treatment= BG

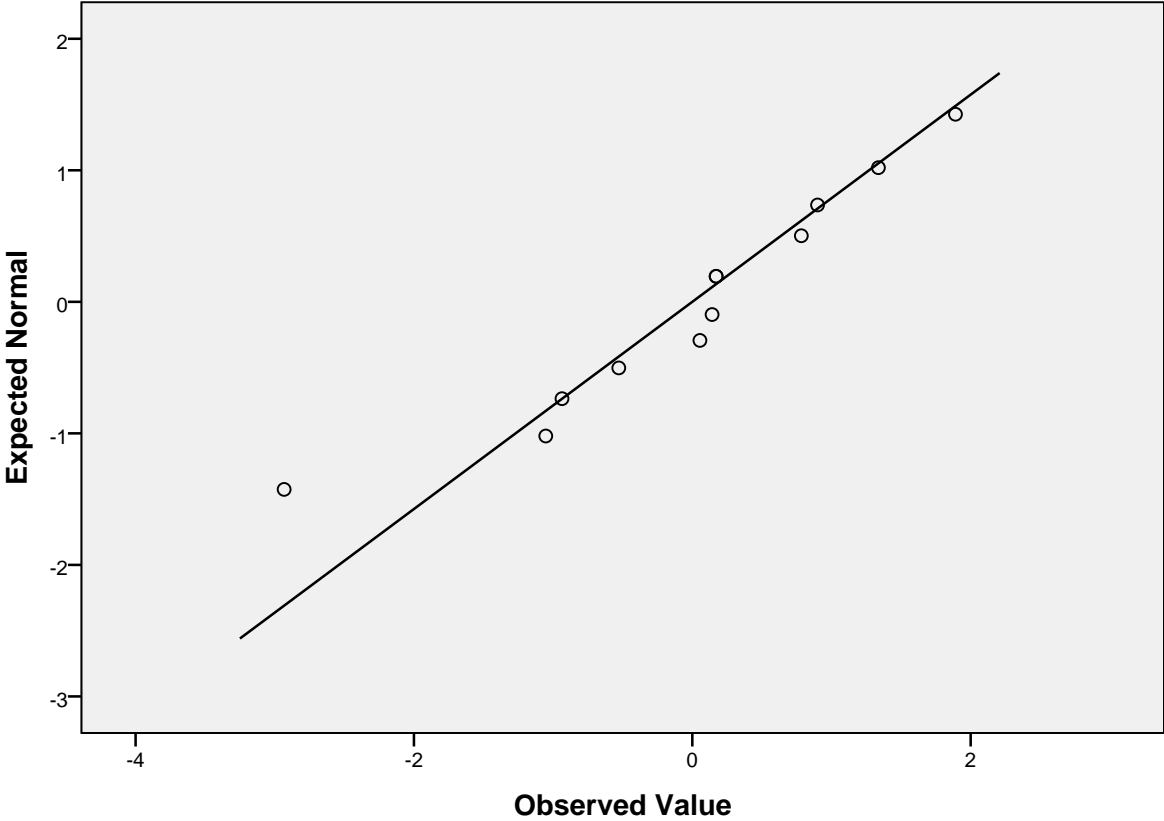

### Normal Q-Q Plot of Standardized Residual for Sec\_1

Treatment= BG

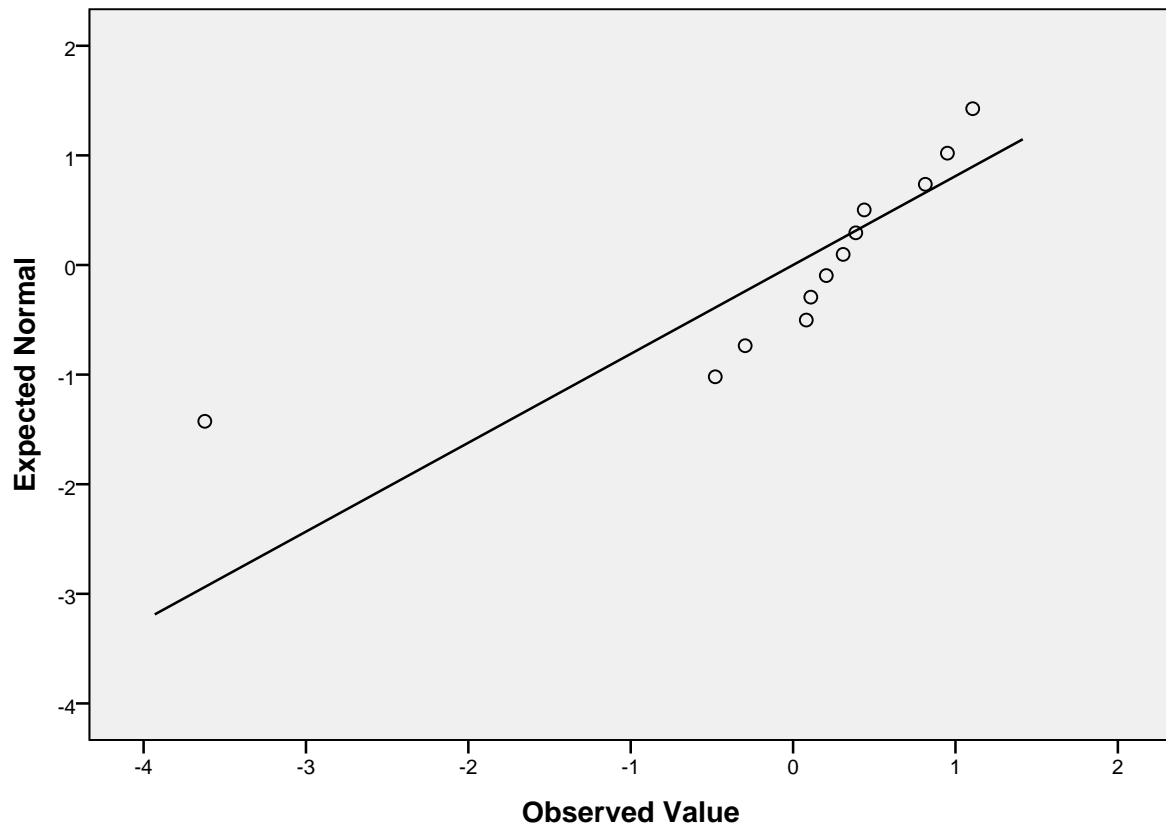

### Normal Q-Q Plot of Standardized Residual for Sec\_5

Treatment= BG

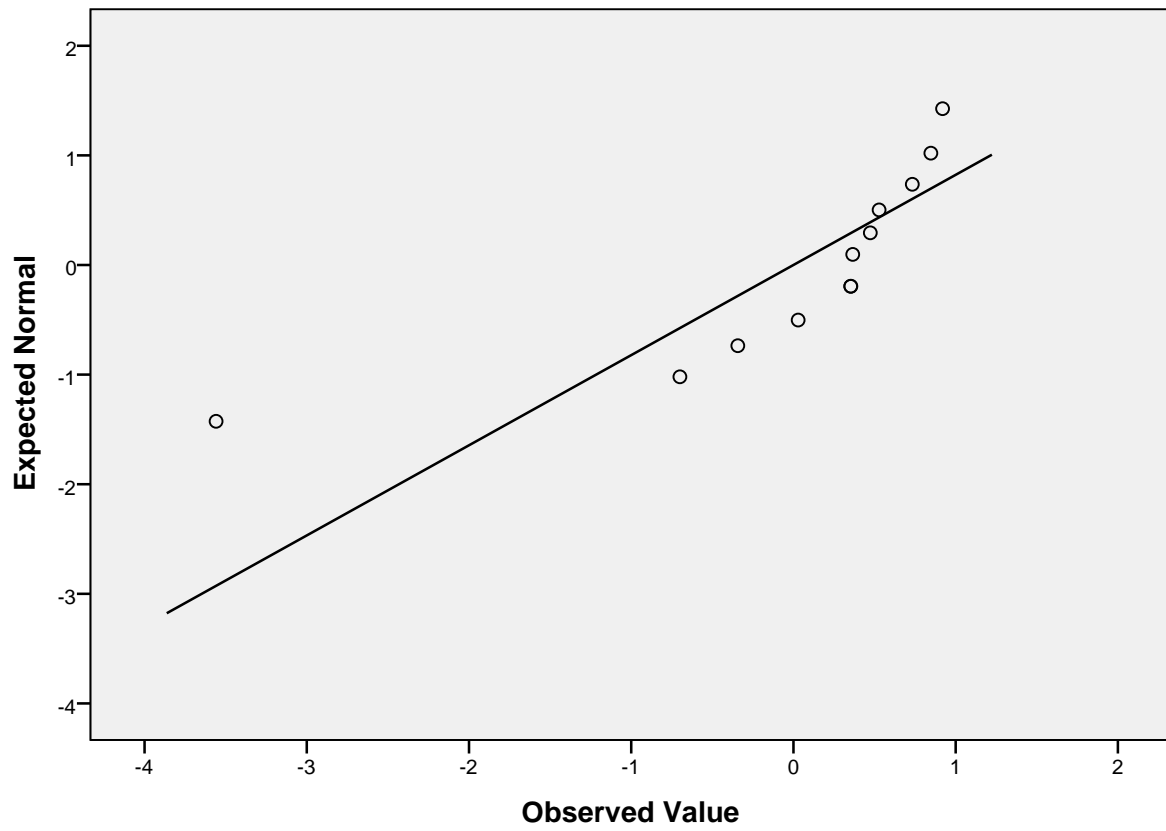

# Normal Q-Q Plot of Standardized Residual for Sec\_10

Treatment= BG

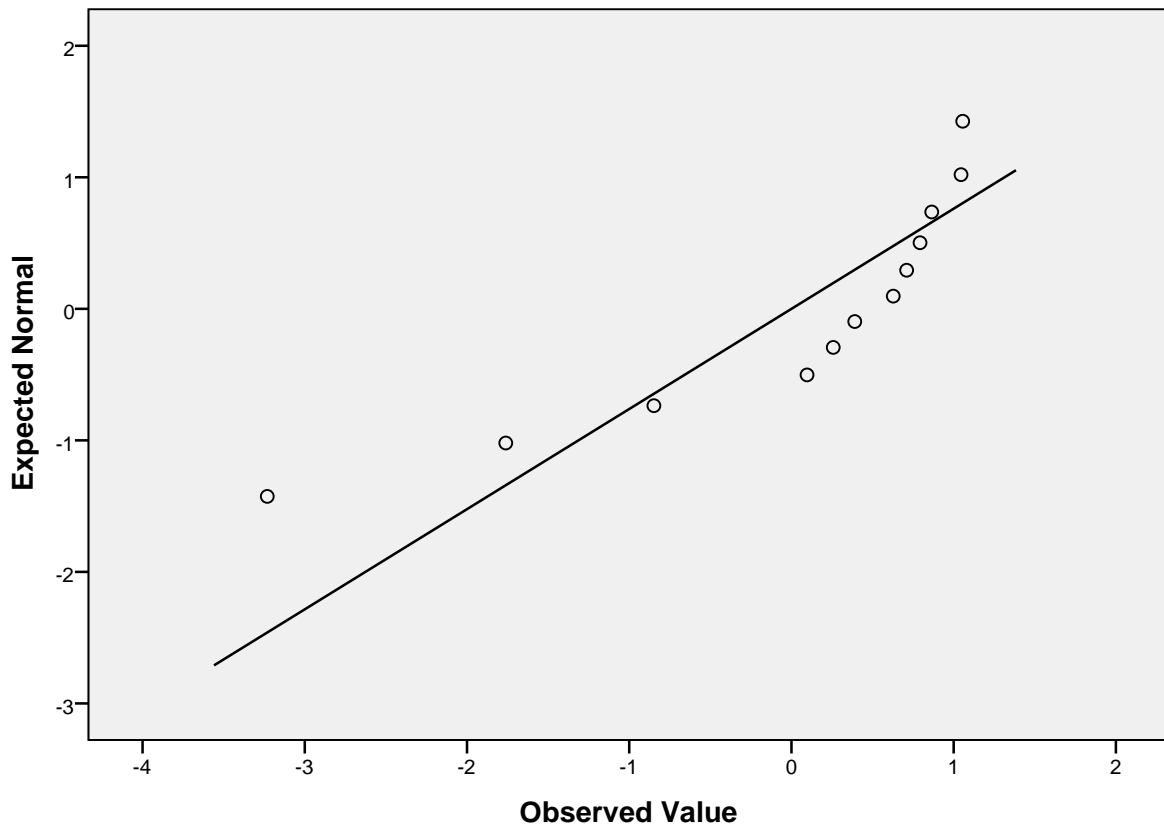

### Normal Q-Q Plot of Standardized Residual for Sec\_20

Treatment= BG

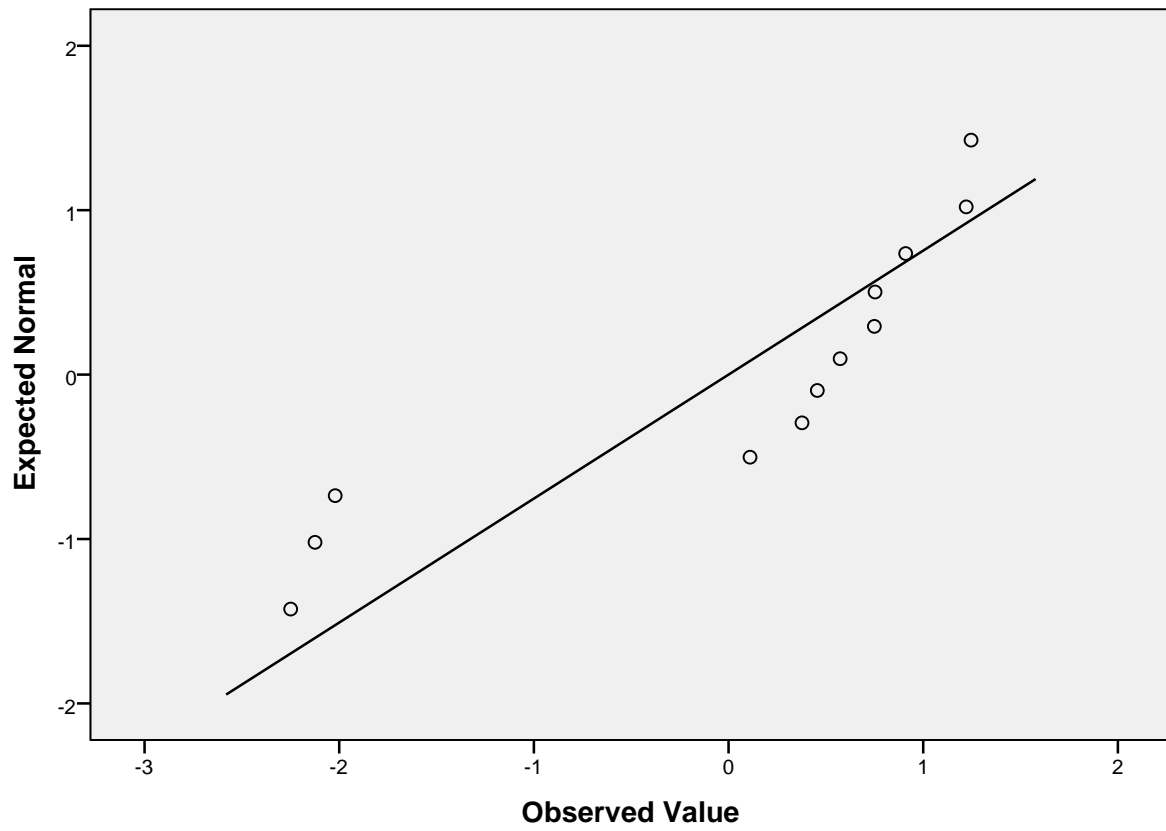

### Normal Q-Q Plot of Standardized Residual for Sec\_30

Treatment= BG

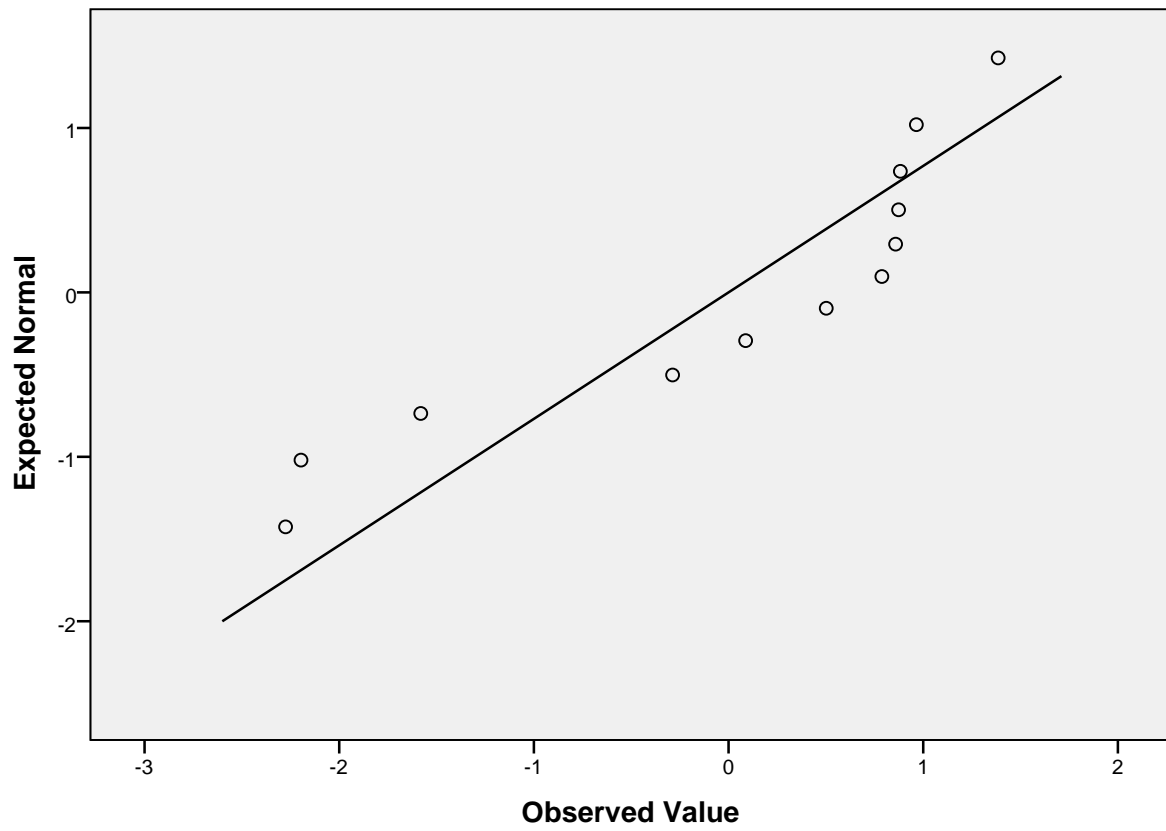

### Normal Q-Q Plot of Standardized Residual for Sec\_40

Treatment= BG

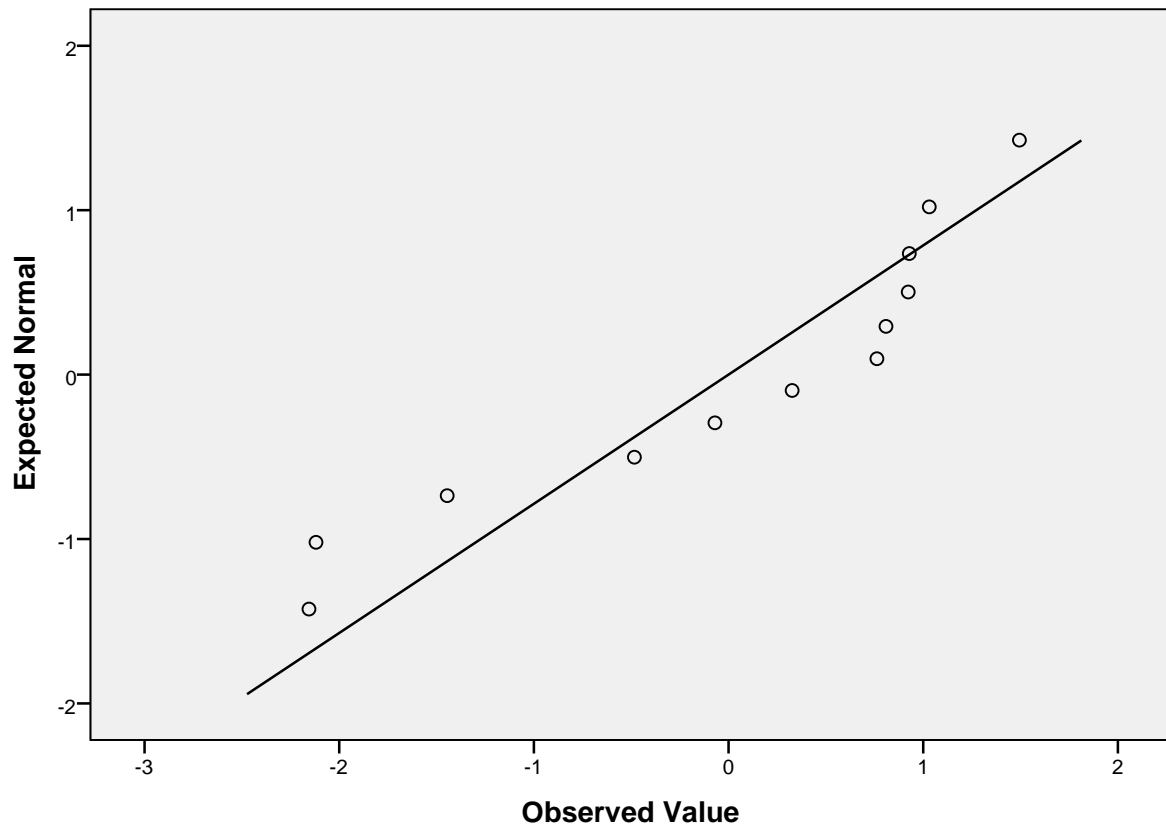

### Normal Q-Q Plot of Standardized Residual for Sec\_50

Treatment= BG

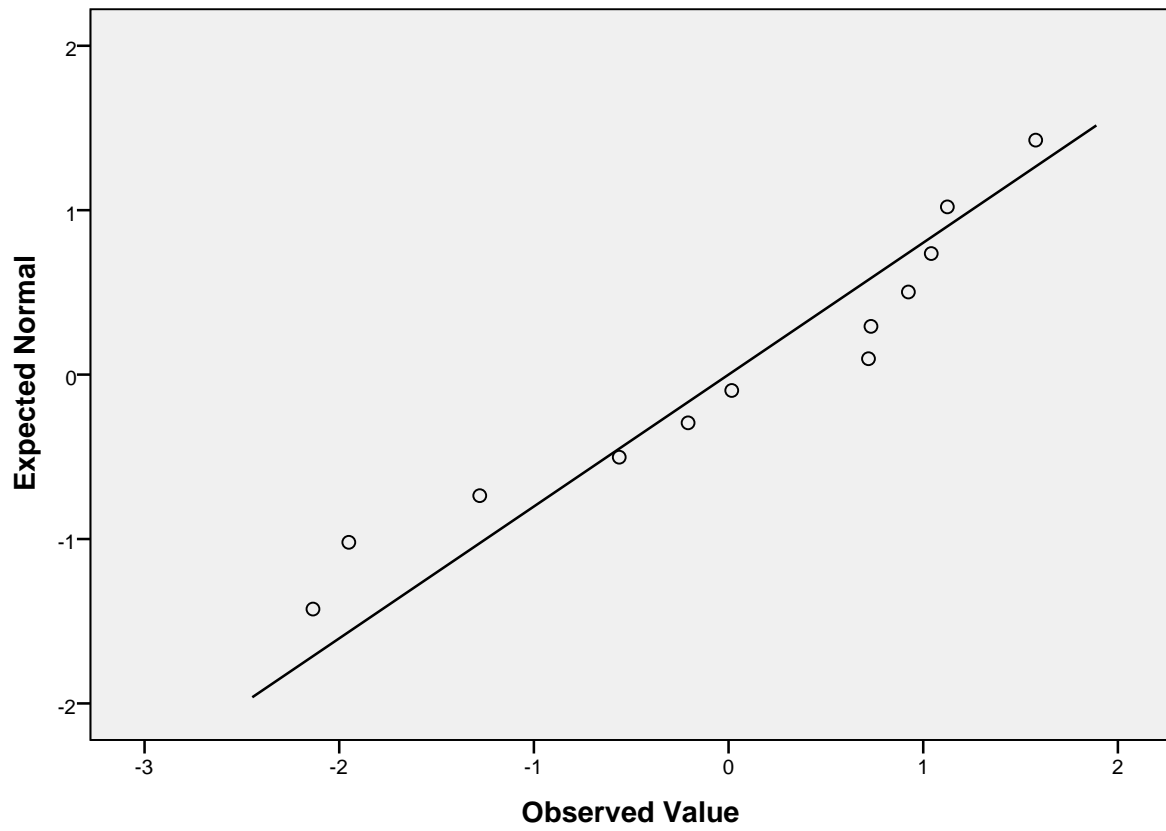



### Normal Q-Q Plot of Standardized Residual for Sec\_60

Treatment= BG

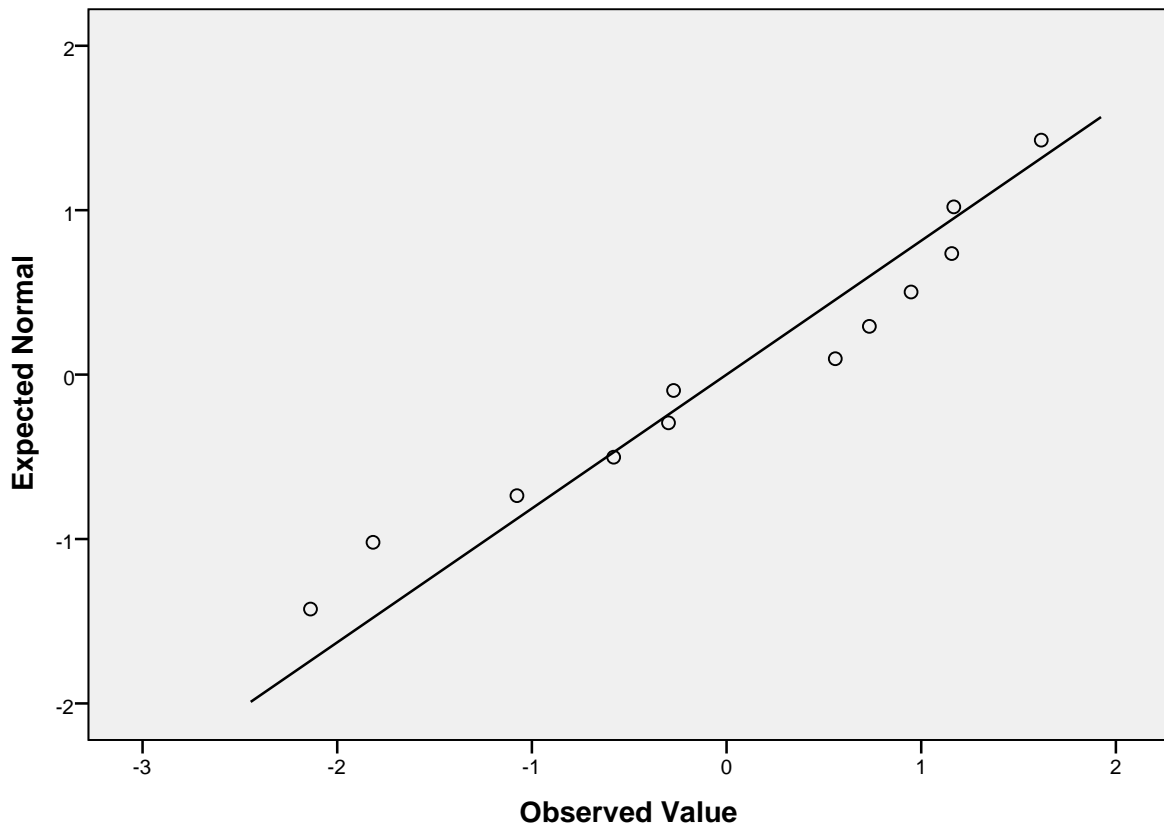

### Detrended Normal Q-Q Plots for SmO<sub>2</sub> During Exercise

**Detrended Normal Q-Q Plot of Standardized Residual for Pre**

Treatment= BG

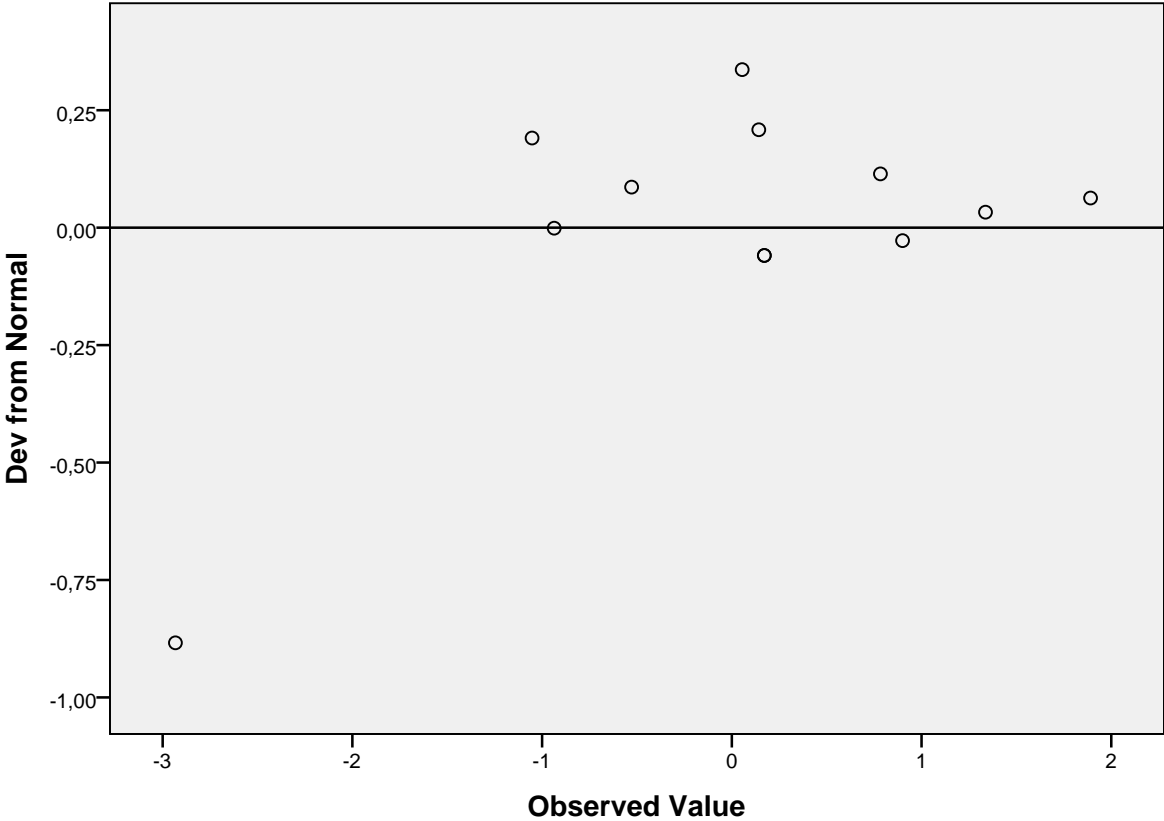

### Detrended Normal Q-Q Plot of Standardized Residual for Sec\_1

Treatment= BG

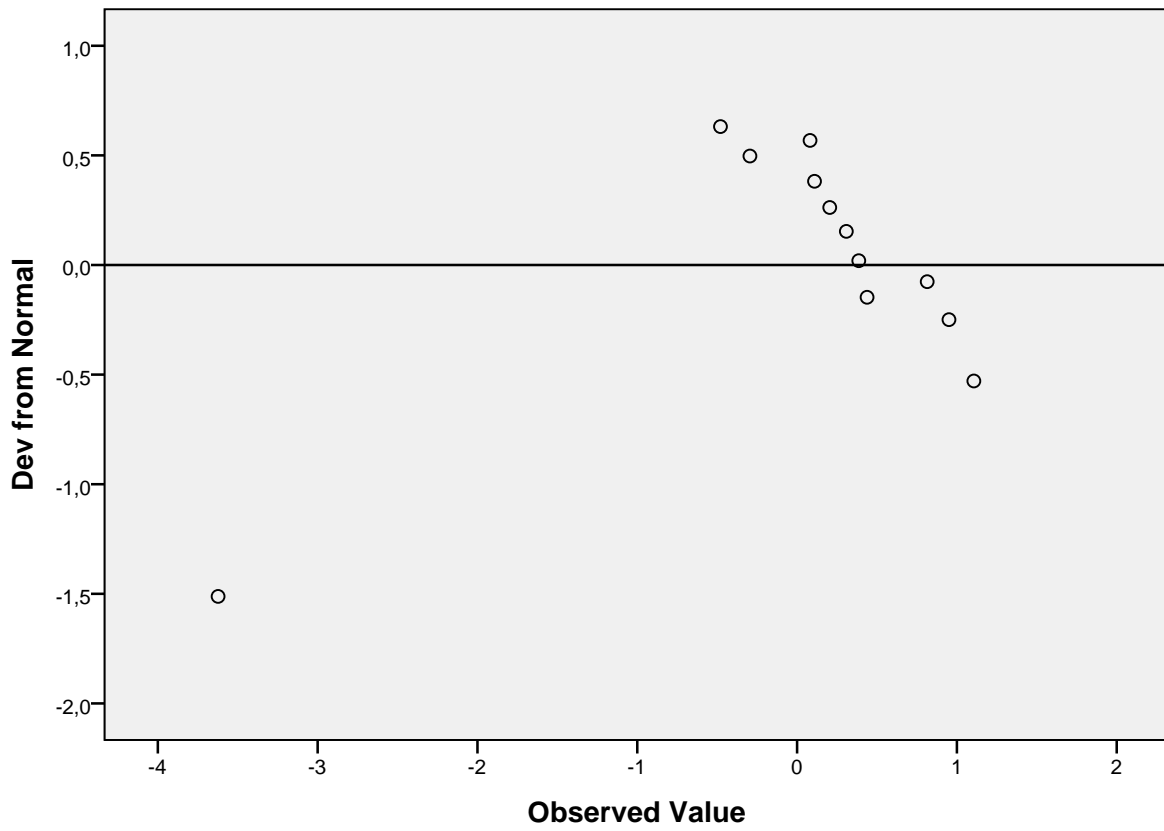

### Detrended Normal Q-Q Plot of Standardized Residual for Sec\_5

Treatment= BG

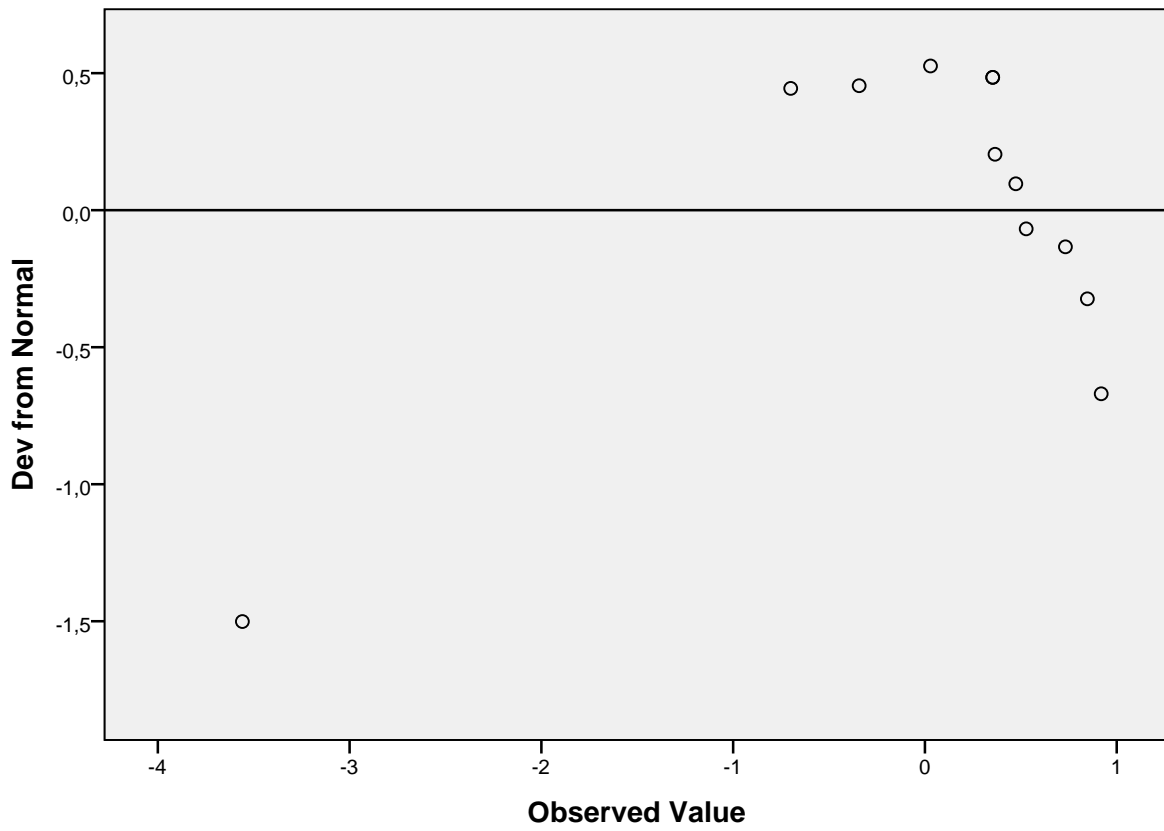

### Detrended Normal Q-Q Plot of Standardized Residual for Sec\_10

Treatment= BG

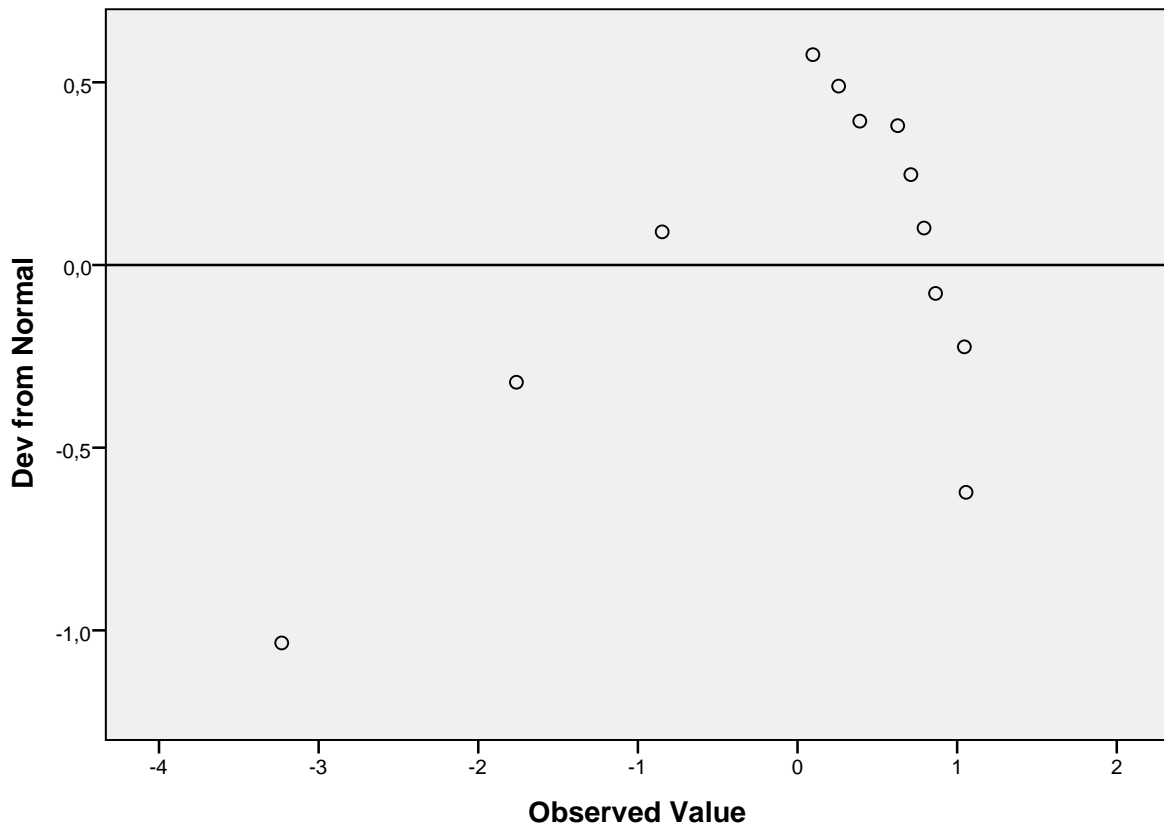

### Detrended Normal Q-Q Plot of Standardized Residual for Sec\_20

Treatment= BG

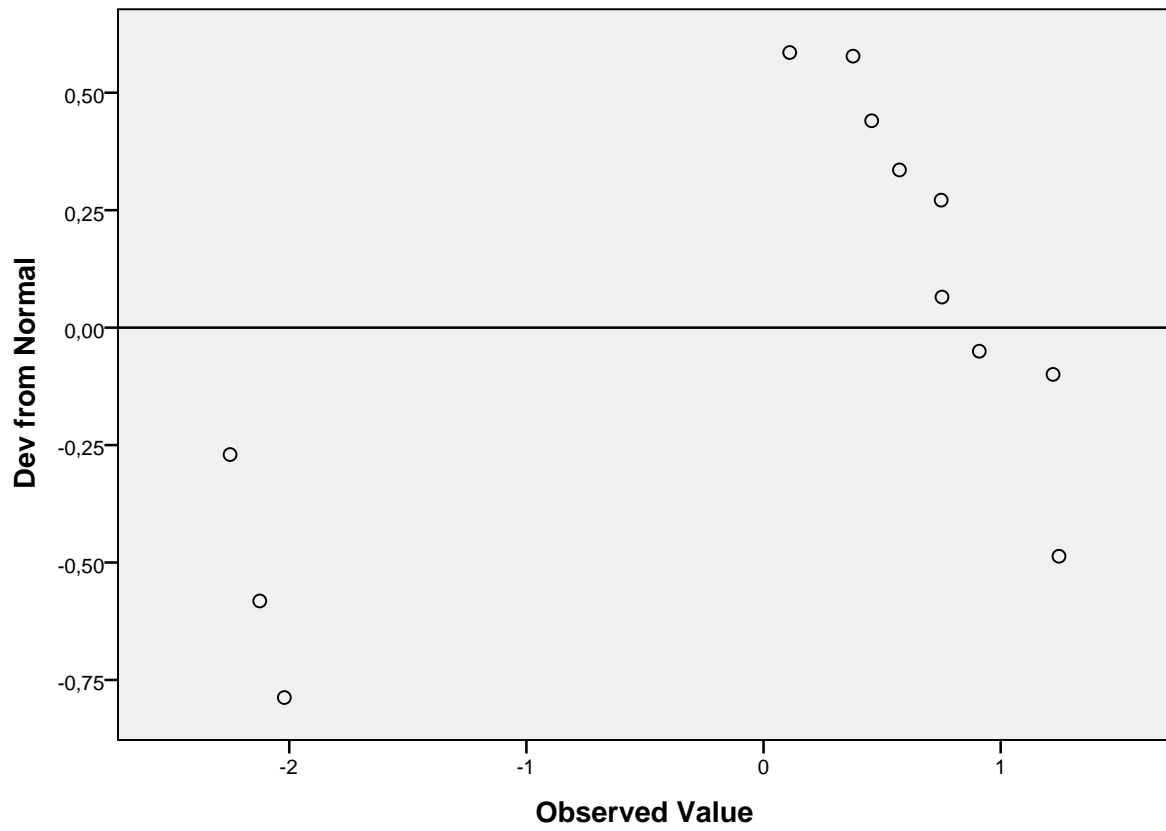

### Detrended Normal Q-Q Plot of Standardized Residual for Sec\_30

Treatment= BG

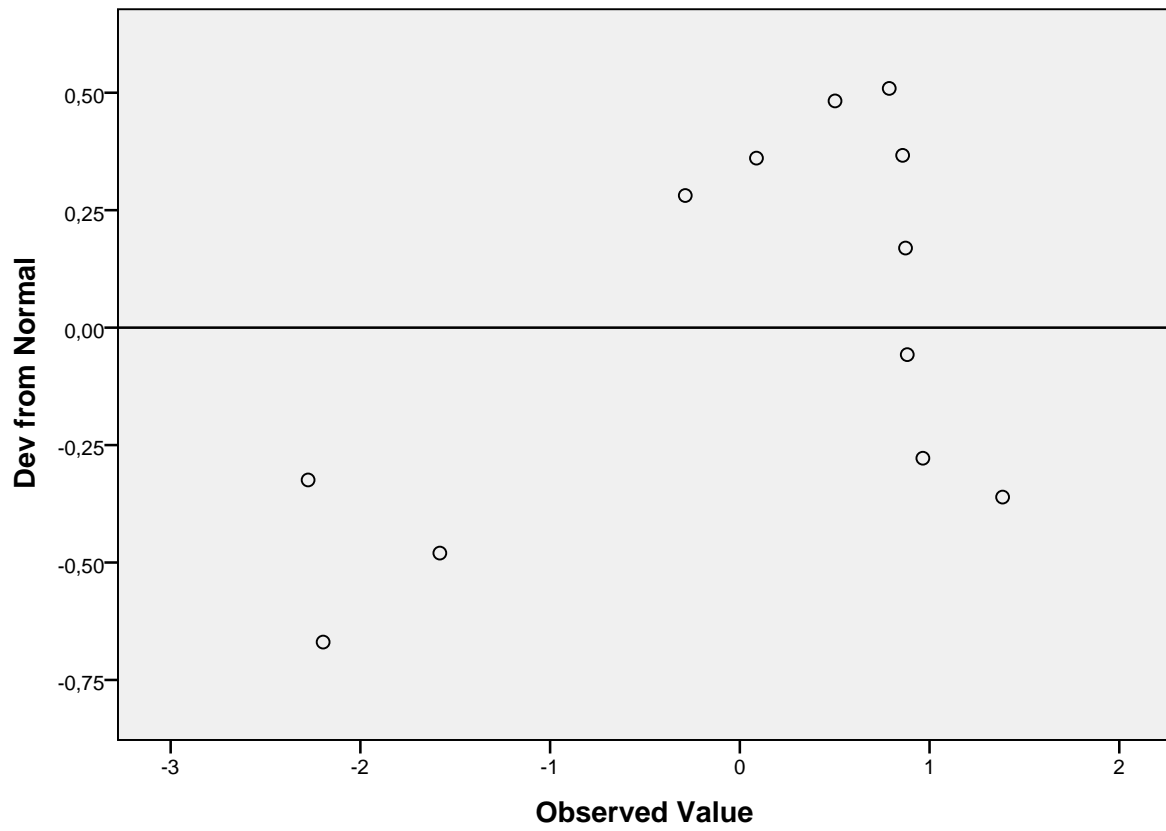

### Detrended Normal Q-Q Plot of Standardized Residual for Sec\_40

Treatment= BG

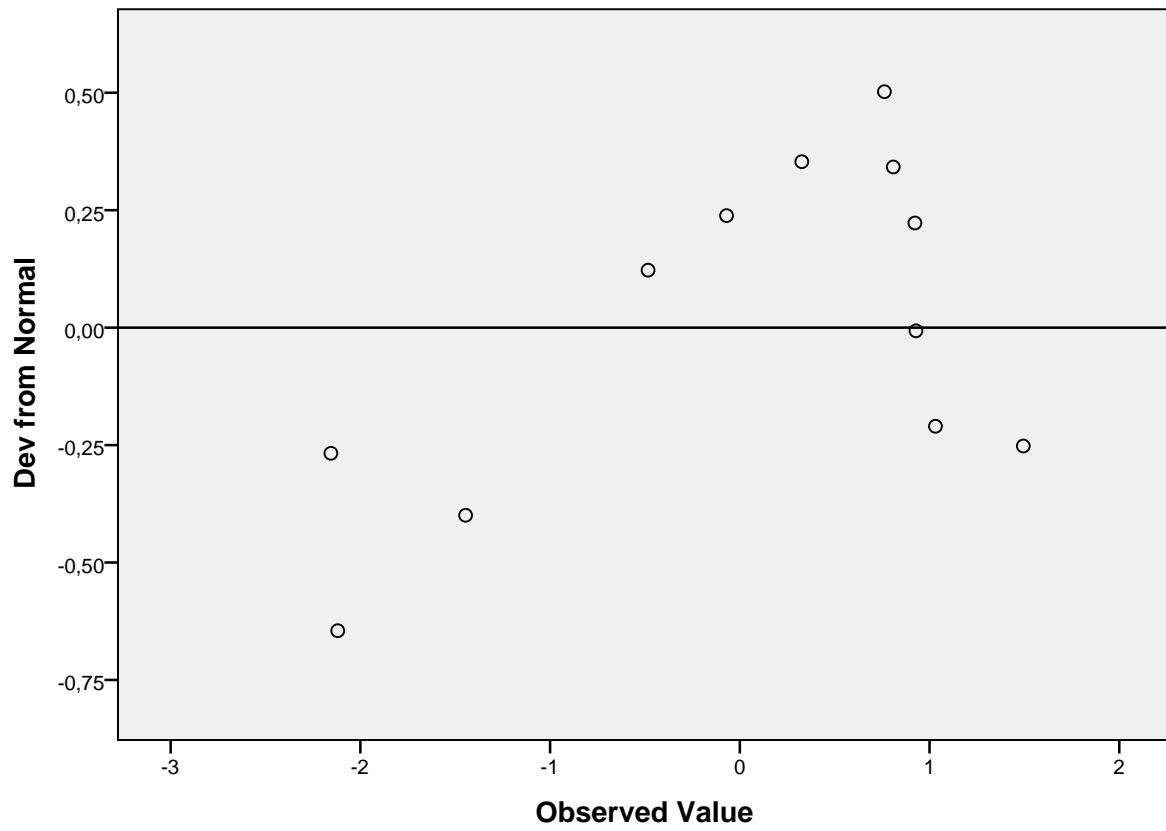



### Detrended Normal Q-Q Plot of Standardized Residual for Sec\_50

Treatment= BG

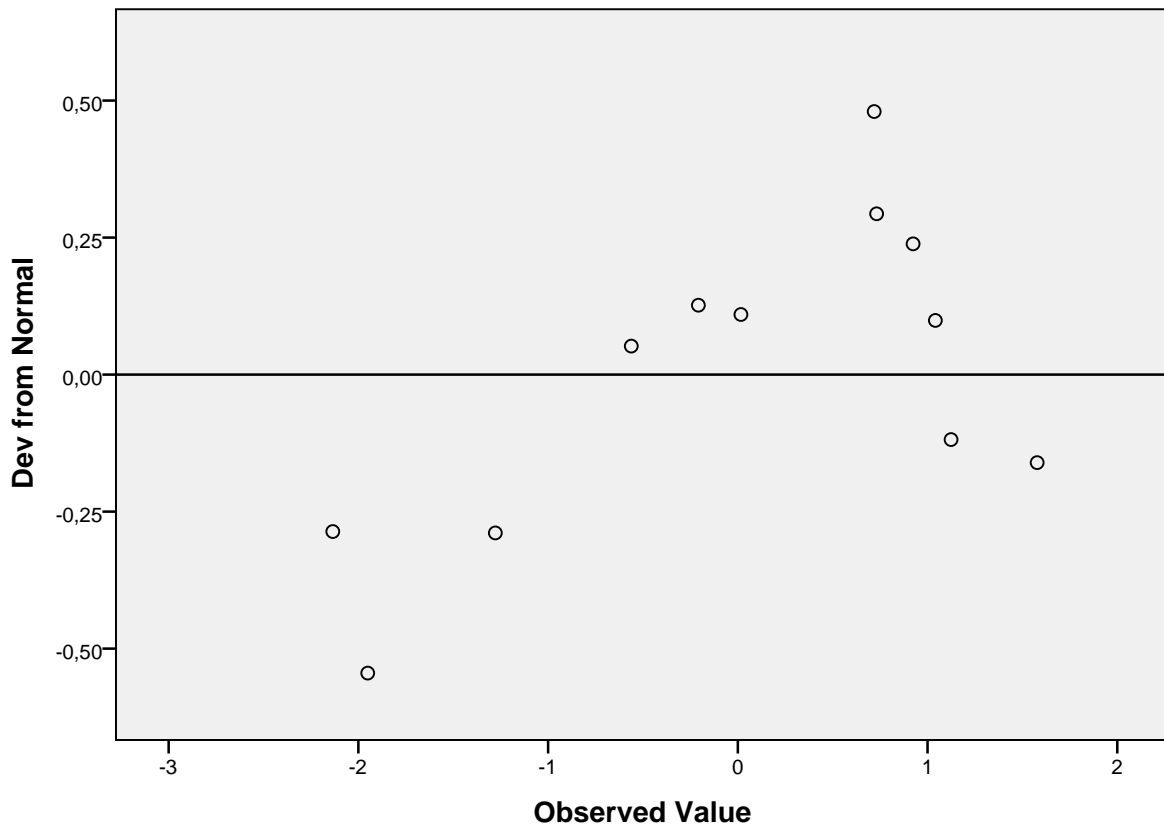

### Detrended Normal Q-Q Plot of Standardized Residual for Sec\_60

Treatment= BG

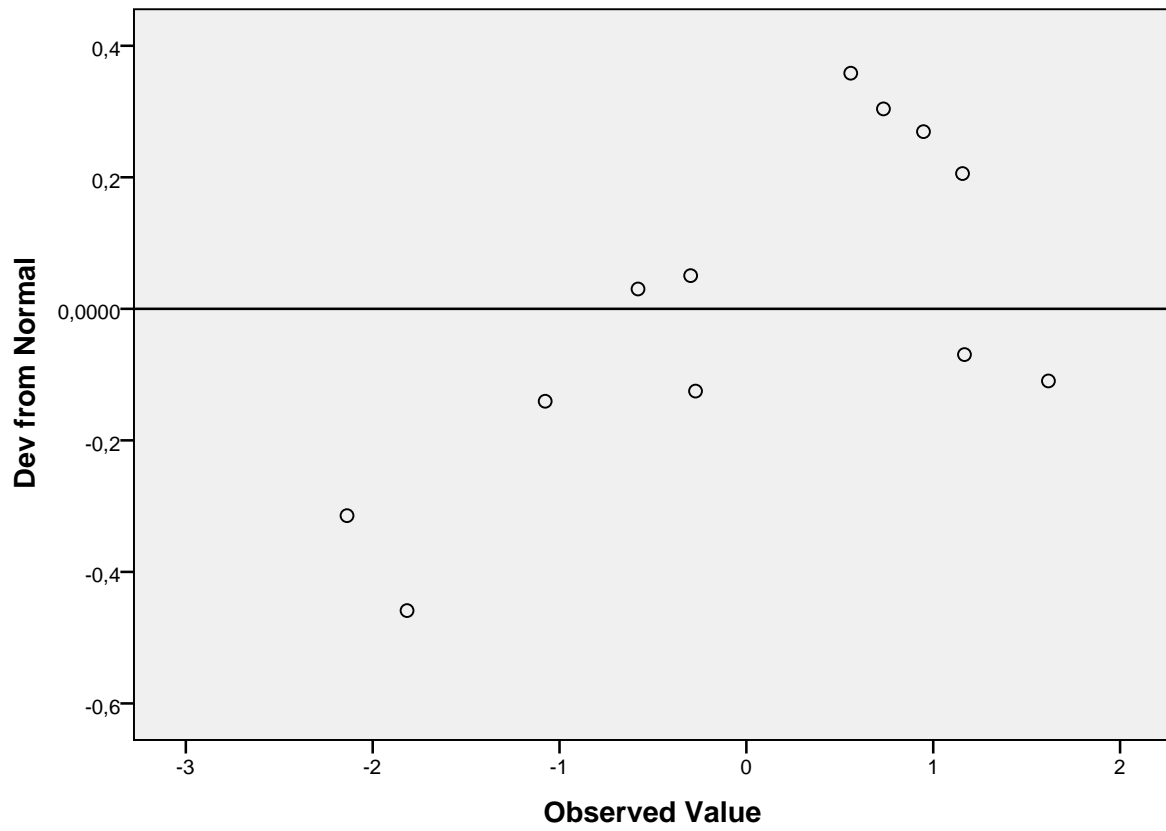

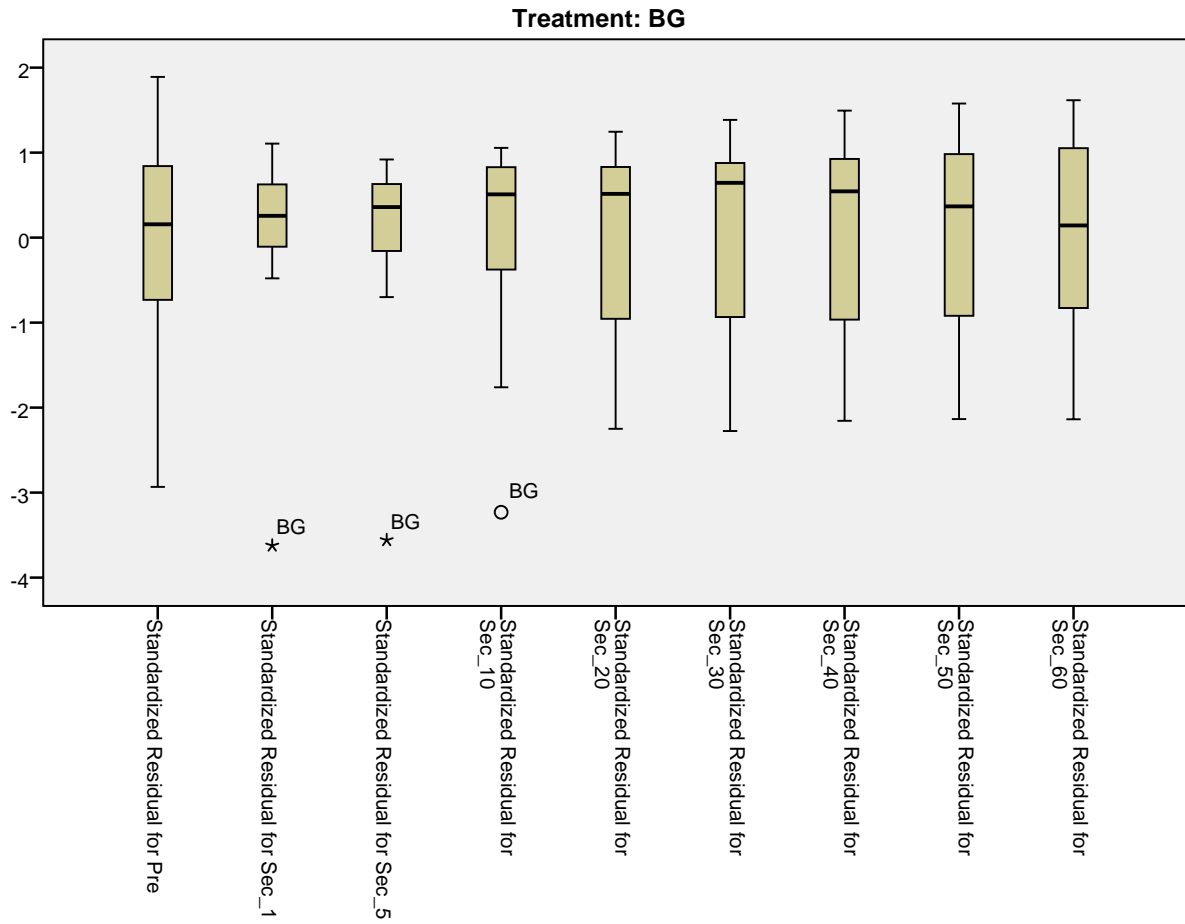

**Normal Q-Q Plots of Standardized Residual for SmQ During Exercise**

### Normal Q-Q Plot of Standardized Residual for Pre

Treatment= PLA

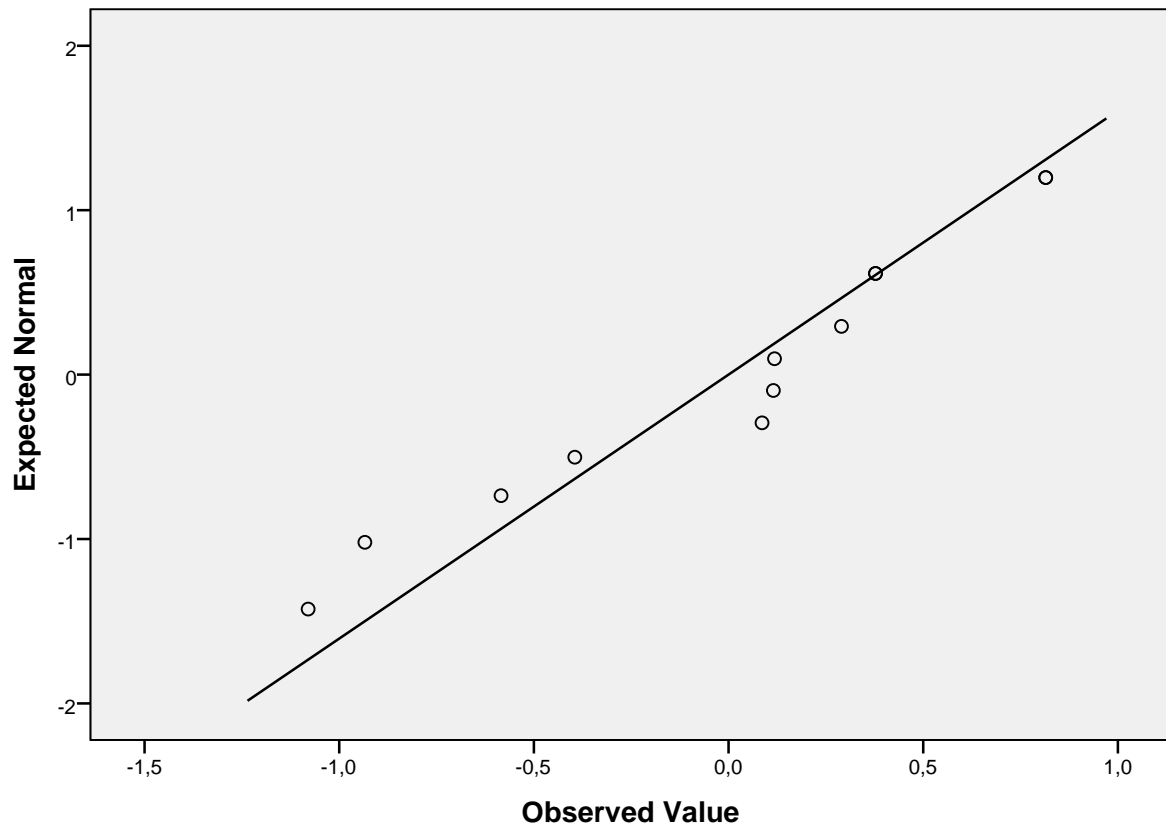

### Normal Q-Q Plot of Standardized Residual for Sec\_1

Treatment= PLA

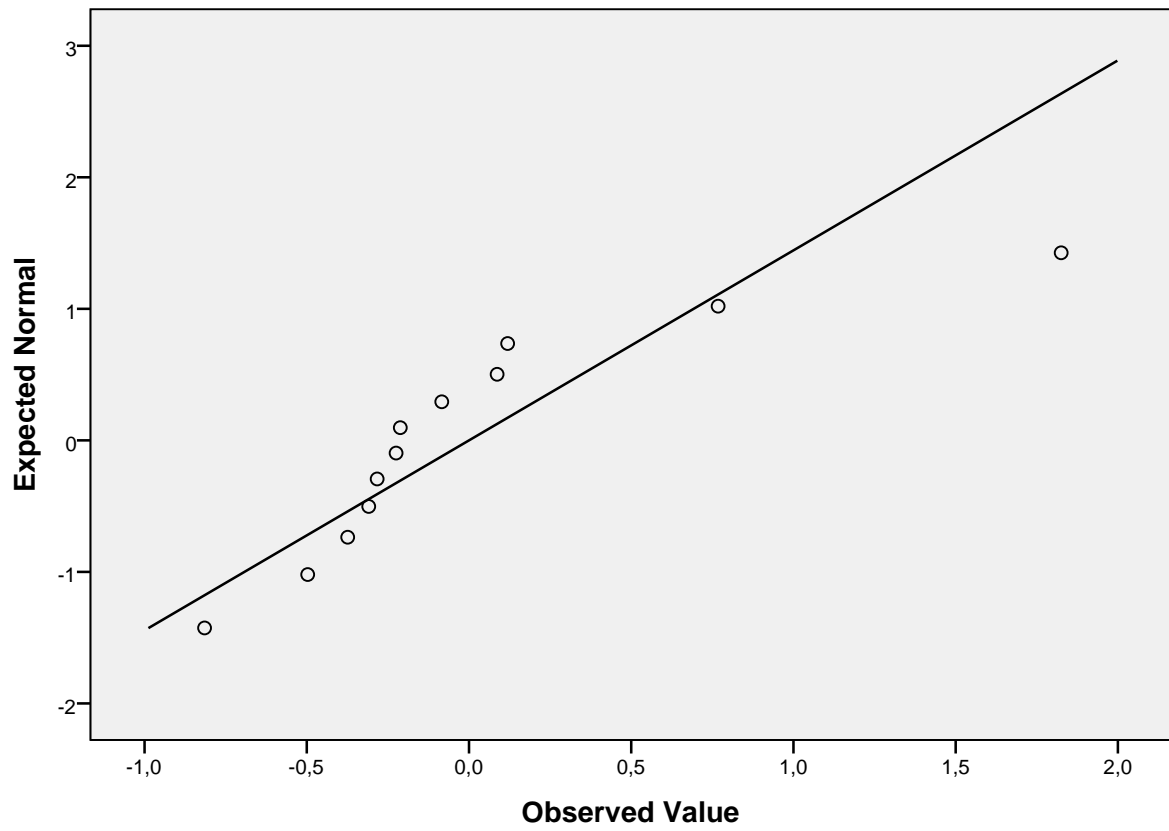

### Normal Q-Q Plot of Standardized Residual for Sec\_5

Treatment= PLA

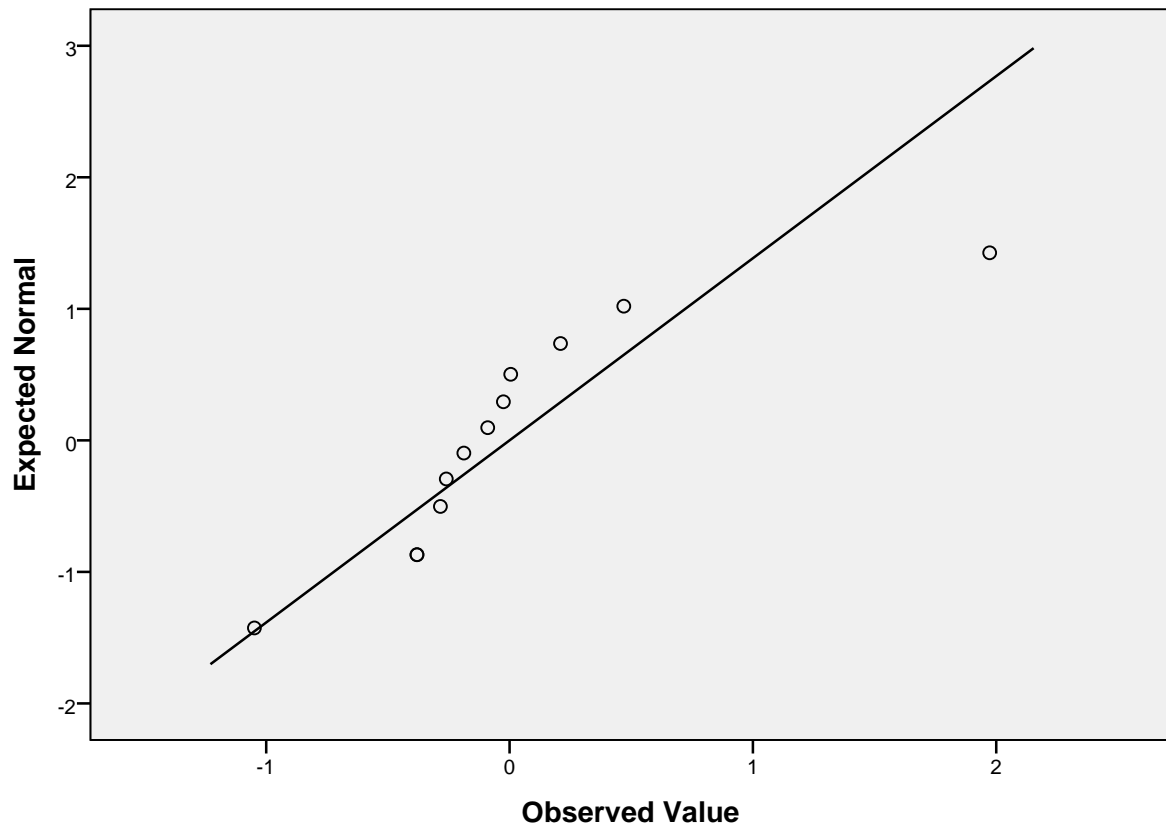

### Normal Q-Q Plot of Standardized Residual for Sec\_10

Treatment= PLA

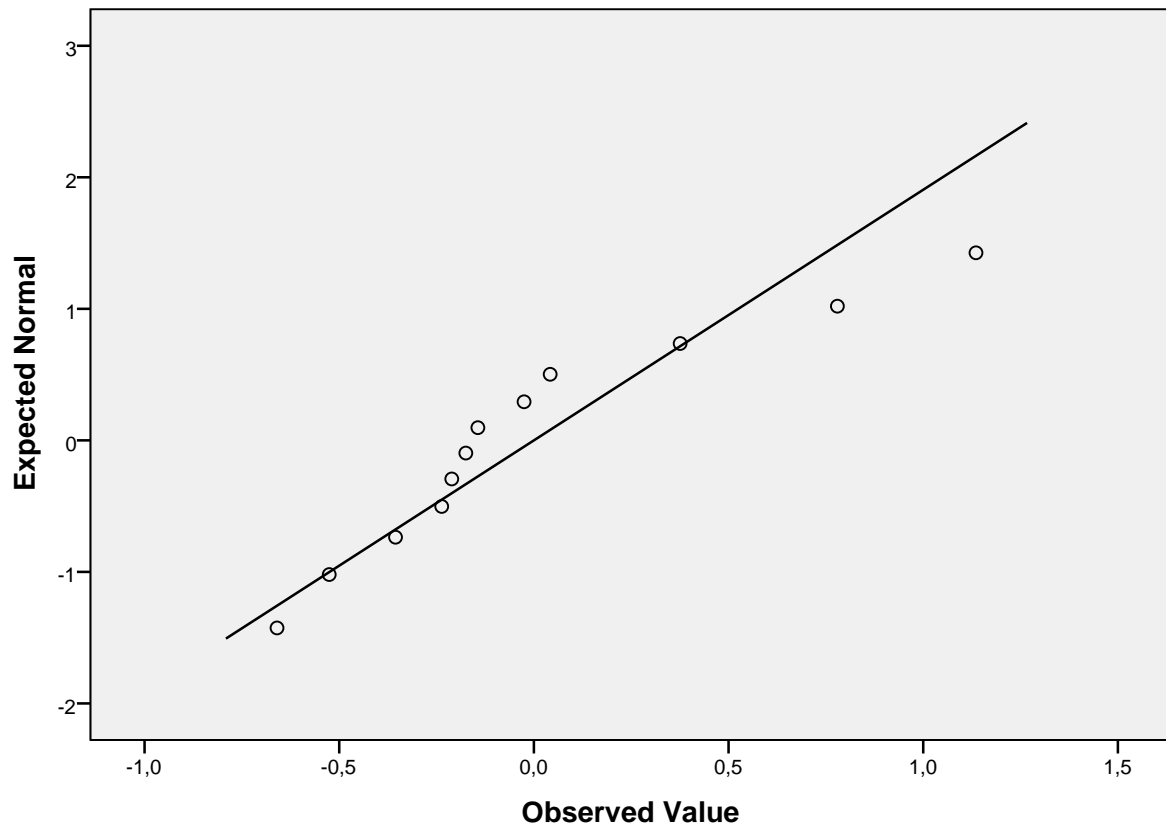

# Normal Q-Q Plot of Standardized Residual for Sec\_20

Treatment= PLA

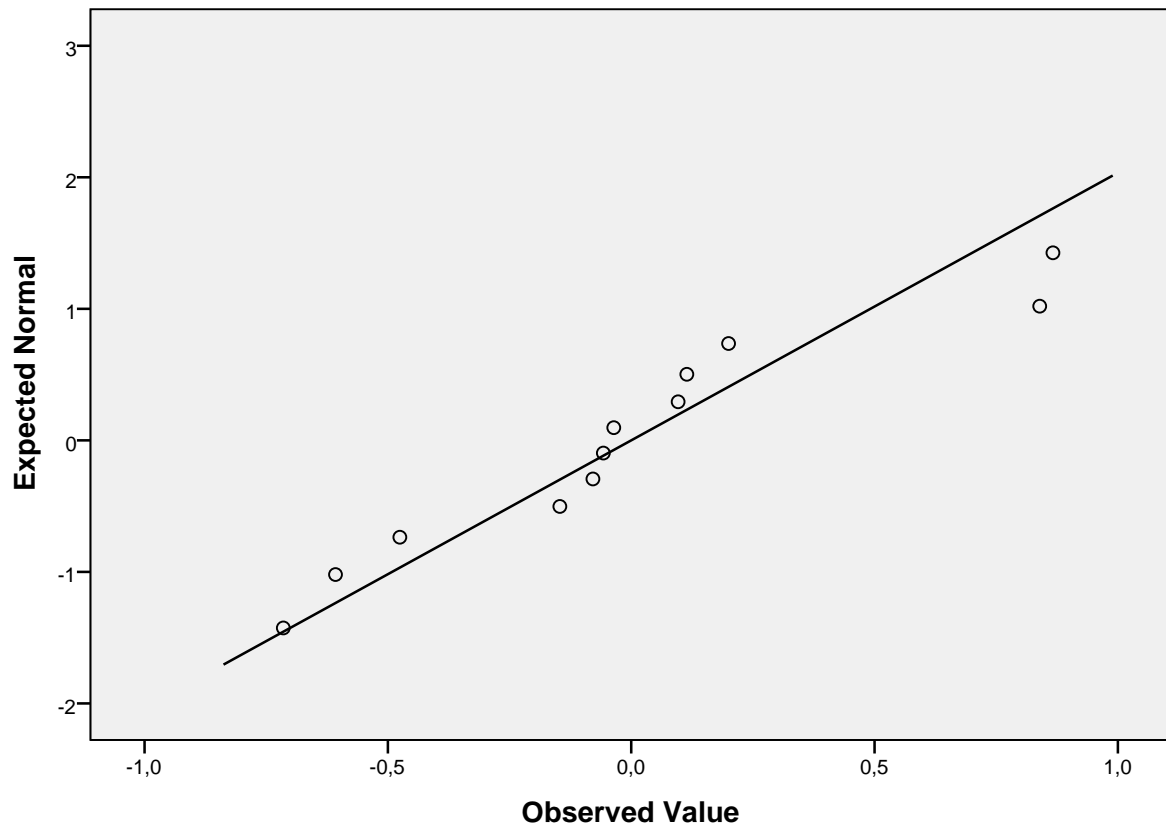



### Normal Q-Q Plot of Standardized Residual for Sec\_30

Treatment= PLA

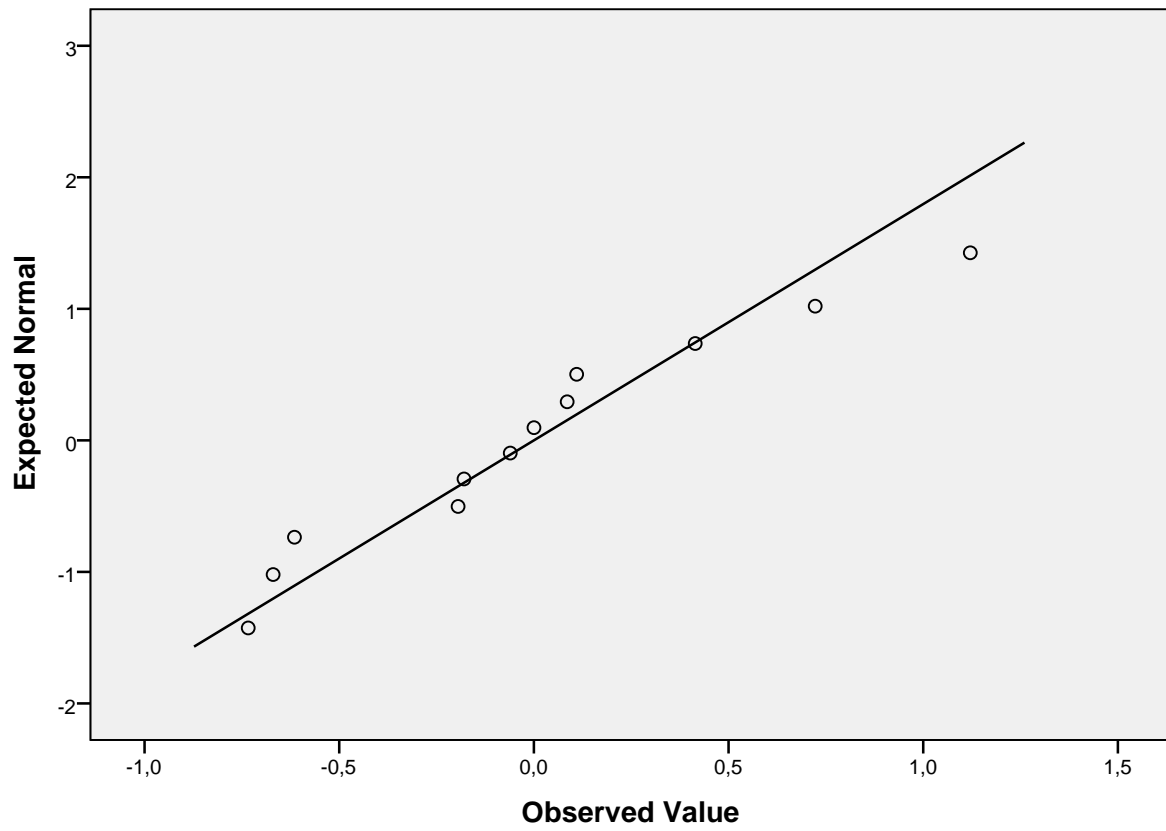

### Normal Q-Q Plot of Standardized Residual for Sec\_40

Treatment= PLA

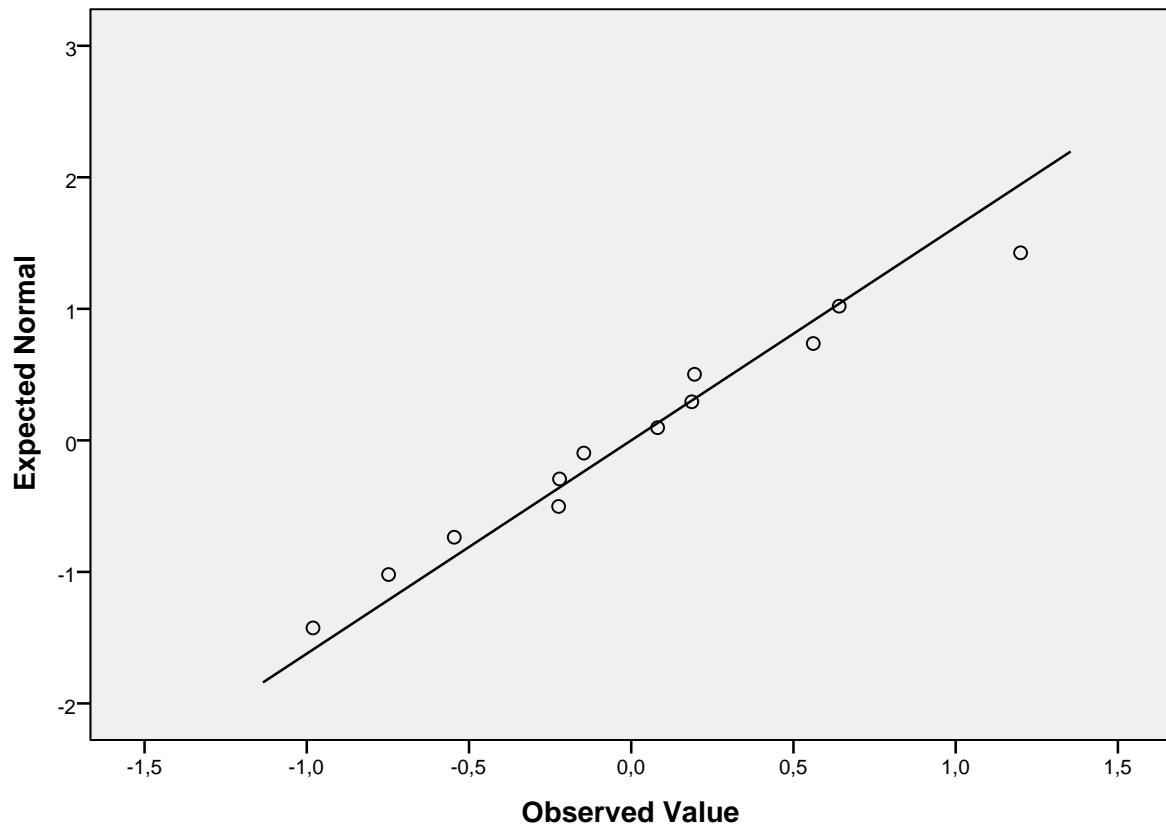

### Normal Q-Q Plot of Standardized Residual for Sec\_50

Treatment= PLA

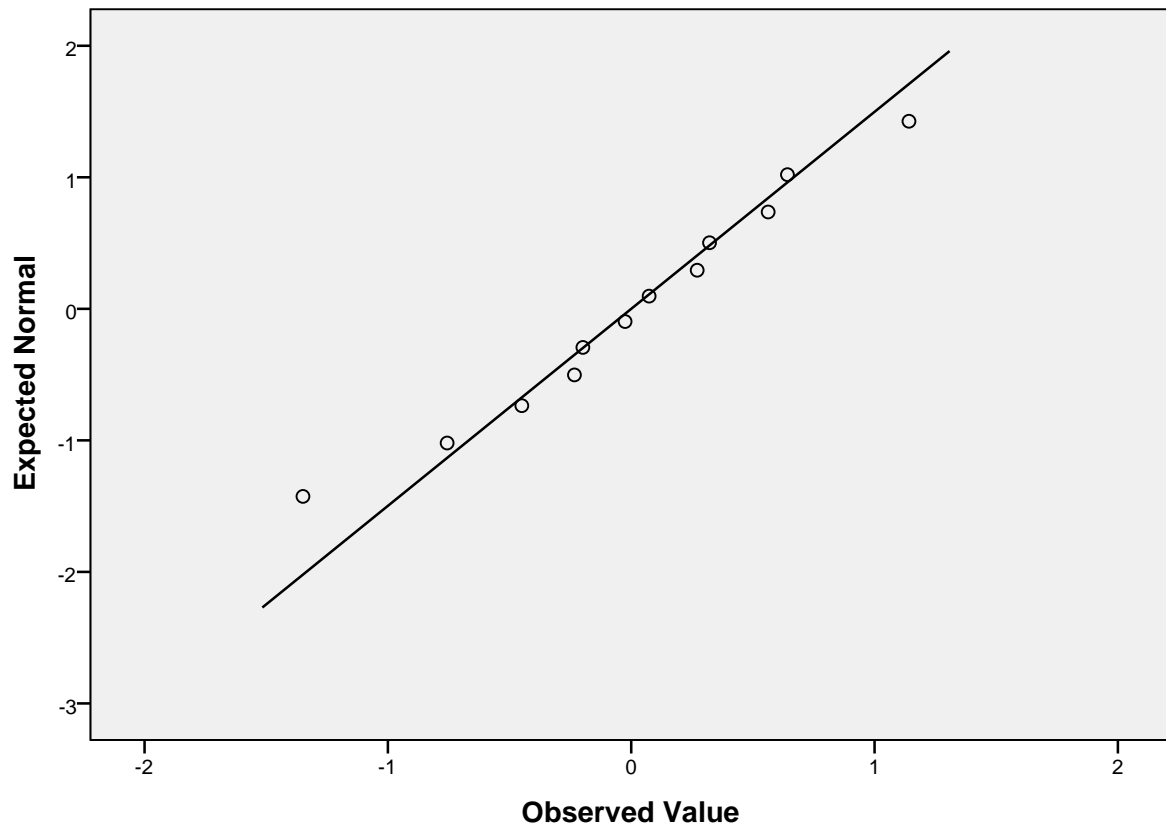

### Normal Q-Q Plot of Standardized Residual for Sec\_60

Treatment= PLA

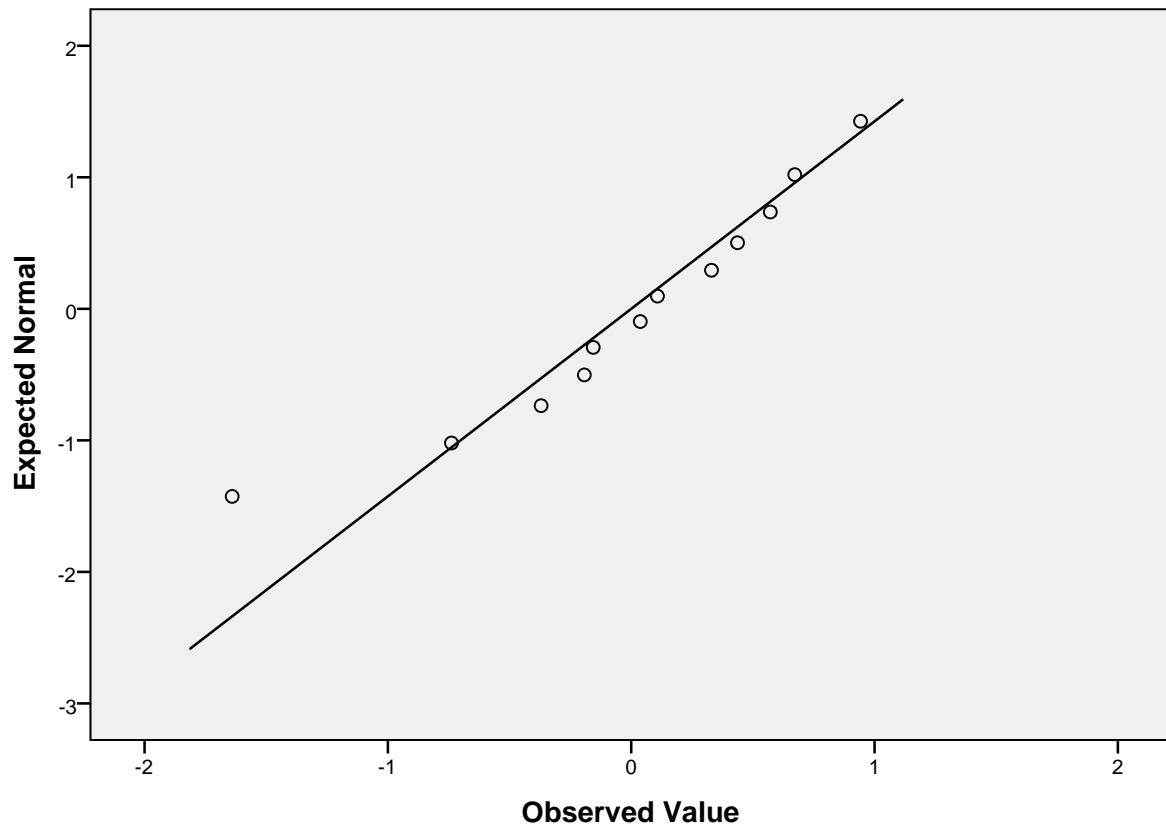

### Detrended Normal Q-Q Plots of Standardized Residual for SmO<sub>2</sub> During Exercise

**Detrended Normal Q-Q Plot of Standardized Residual for Pre**

**Treatment= PLA**

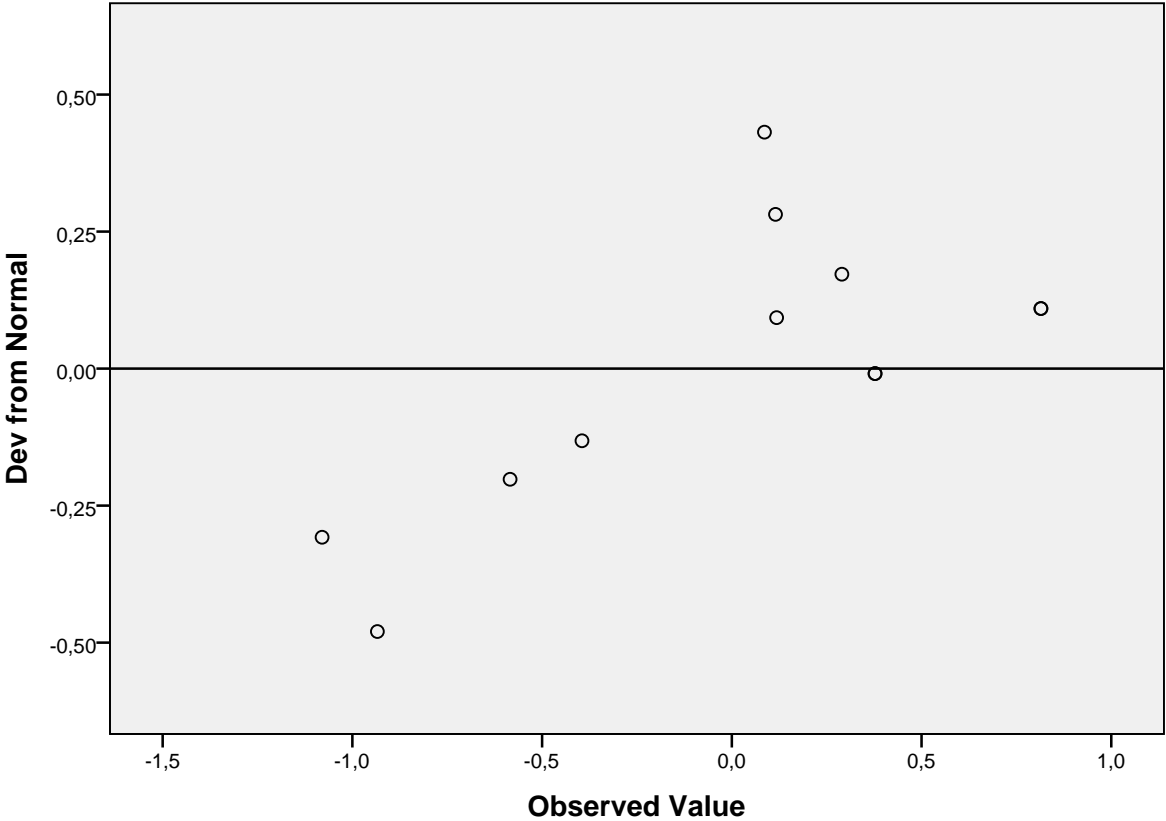

### Detrended Normal Q-Q Plot of Standardized Residual for Sec\_1

Treatment= PLA

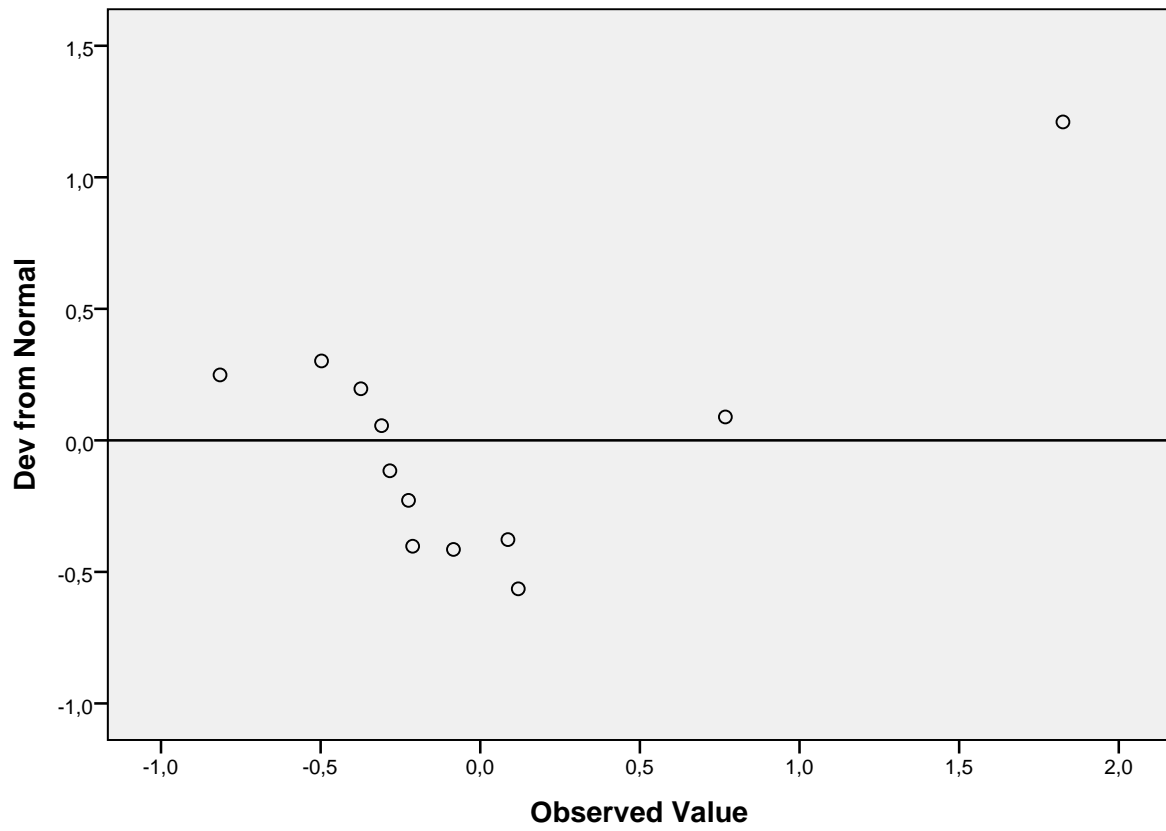

### Detrended Normal Q-Q Plot of Standardized Residual for Sec\_5

Treatment= PLA

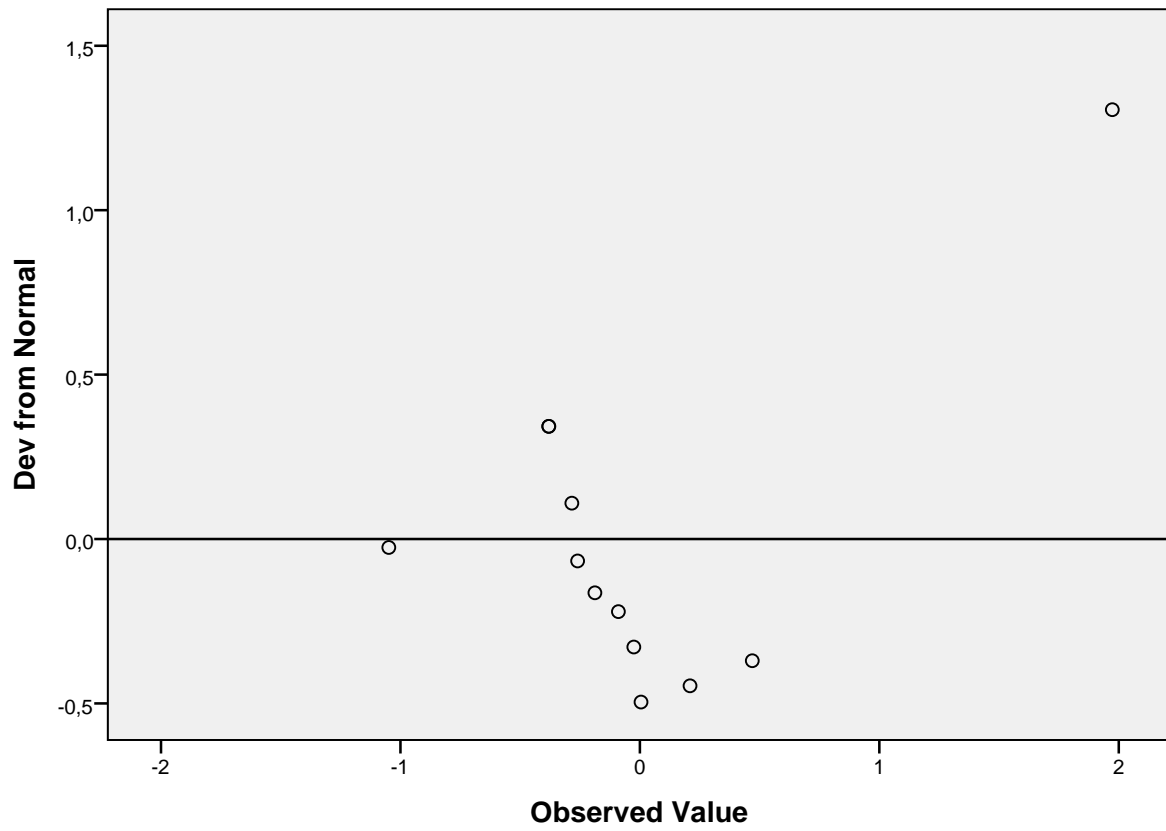

### Detrended Normal Q-Q Plot of Standardized Residual for Sec\_10

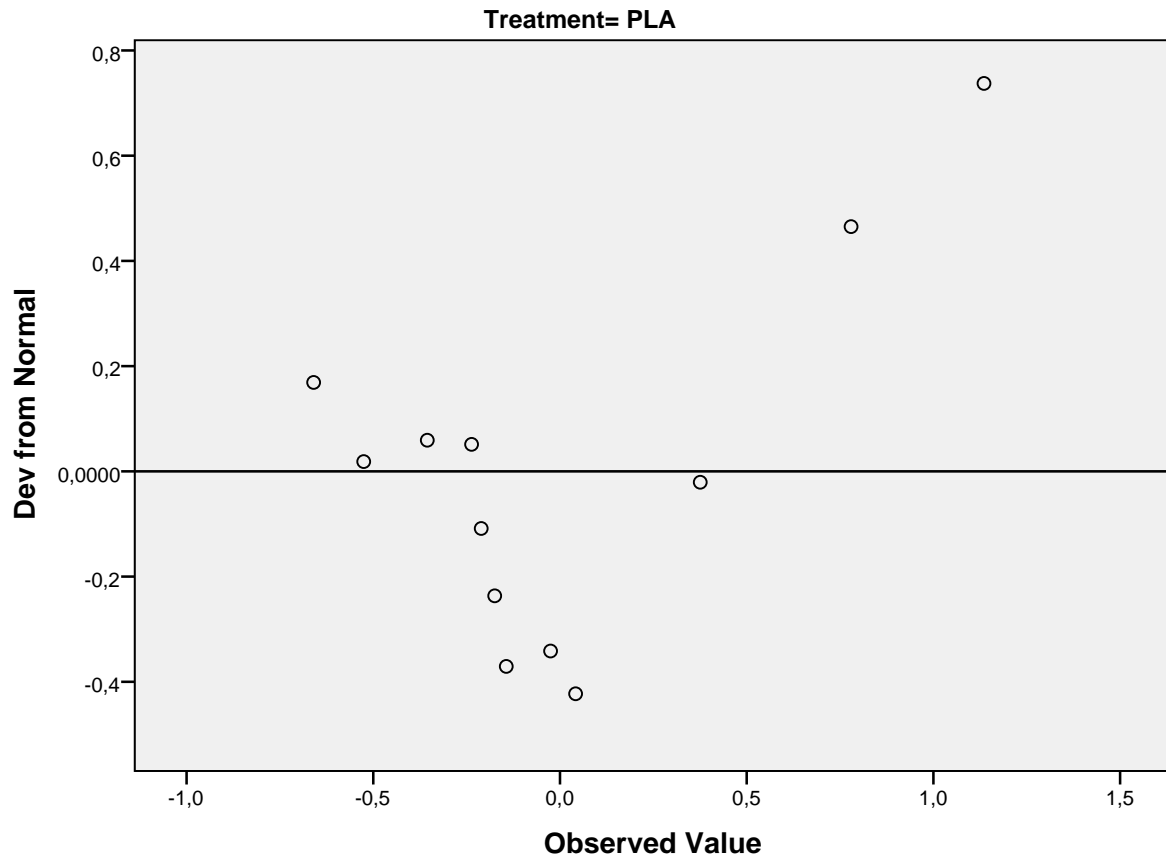



### Detrended Normal Q-Q Plot of Standardized Residual for Sec\_20

Treatment= PLA

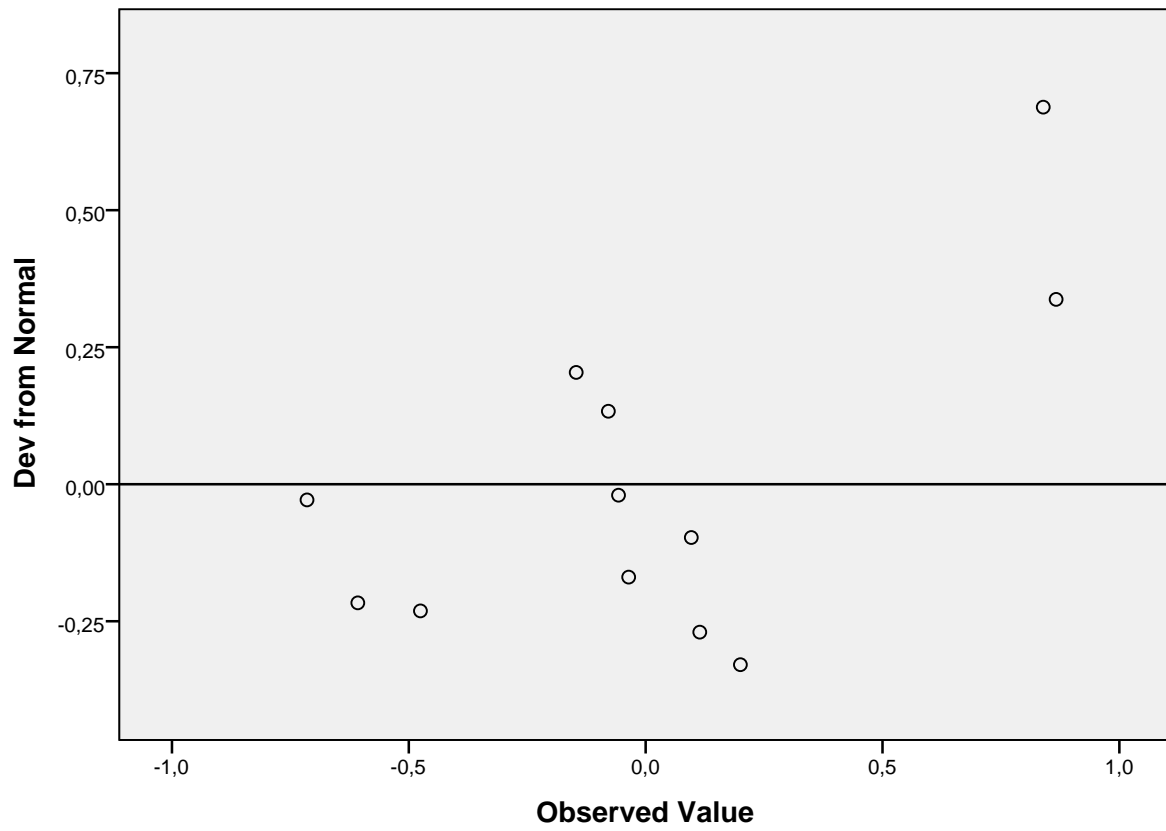

### Detrended Normal Q-Q Plot of Standardized Residual for Sec\_30

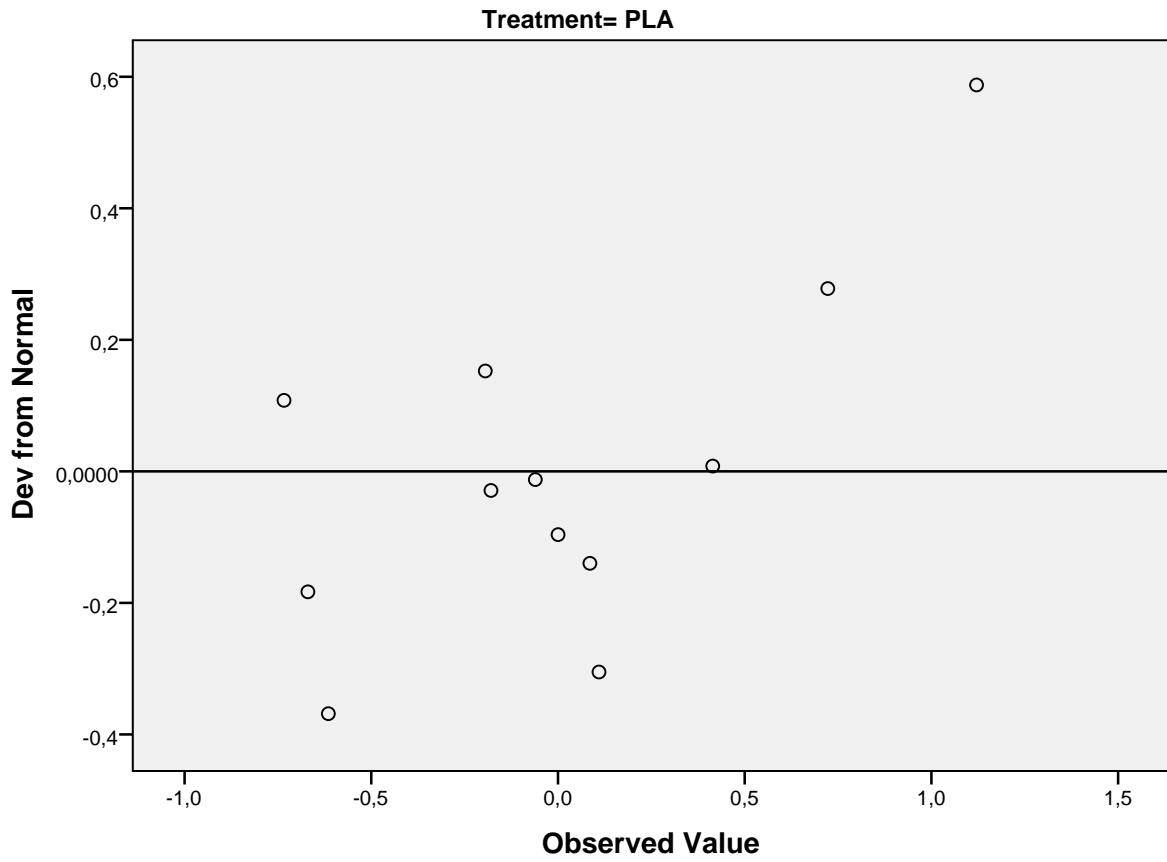

### Detrended Normal Q-Q Plot of Standardized Residual for Sec\_40

Treatment= PLA

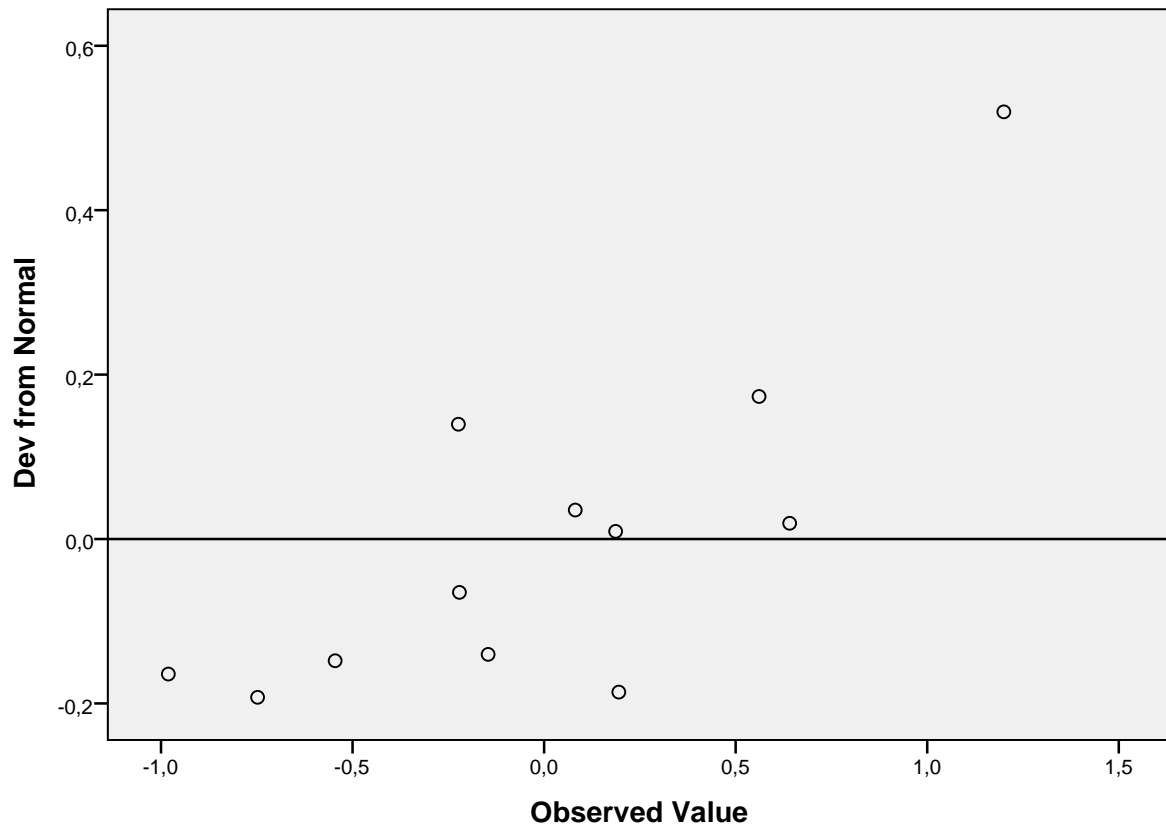

### Detrended Normal Q-Q Plot of Standardized Residual for Sec\_50

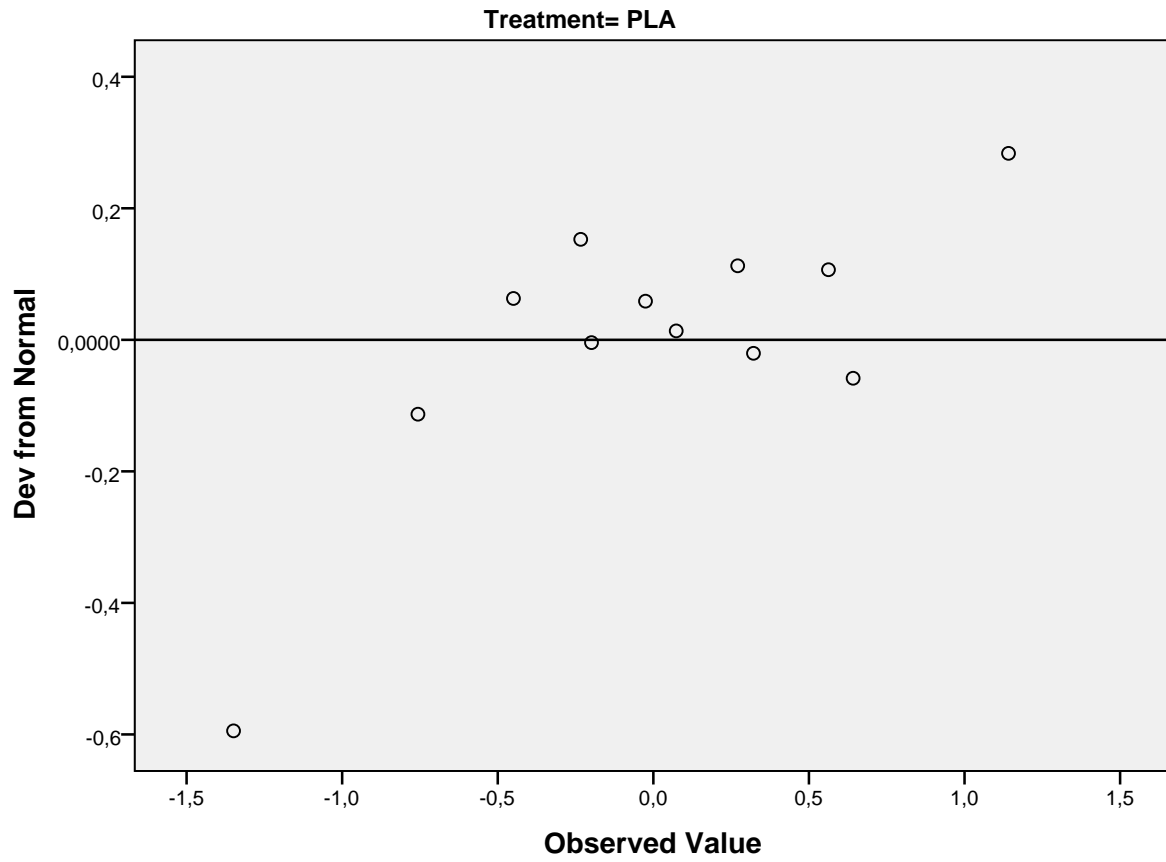

### Detrended Normal Q-Q Plot of Standardized Residual for Sec\_60

Treatment= PLA

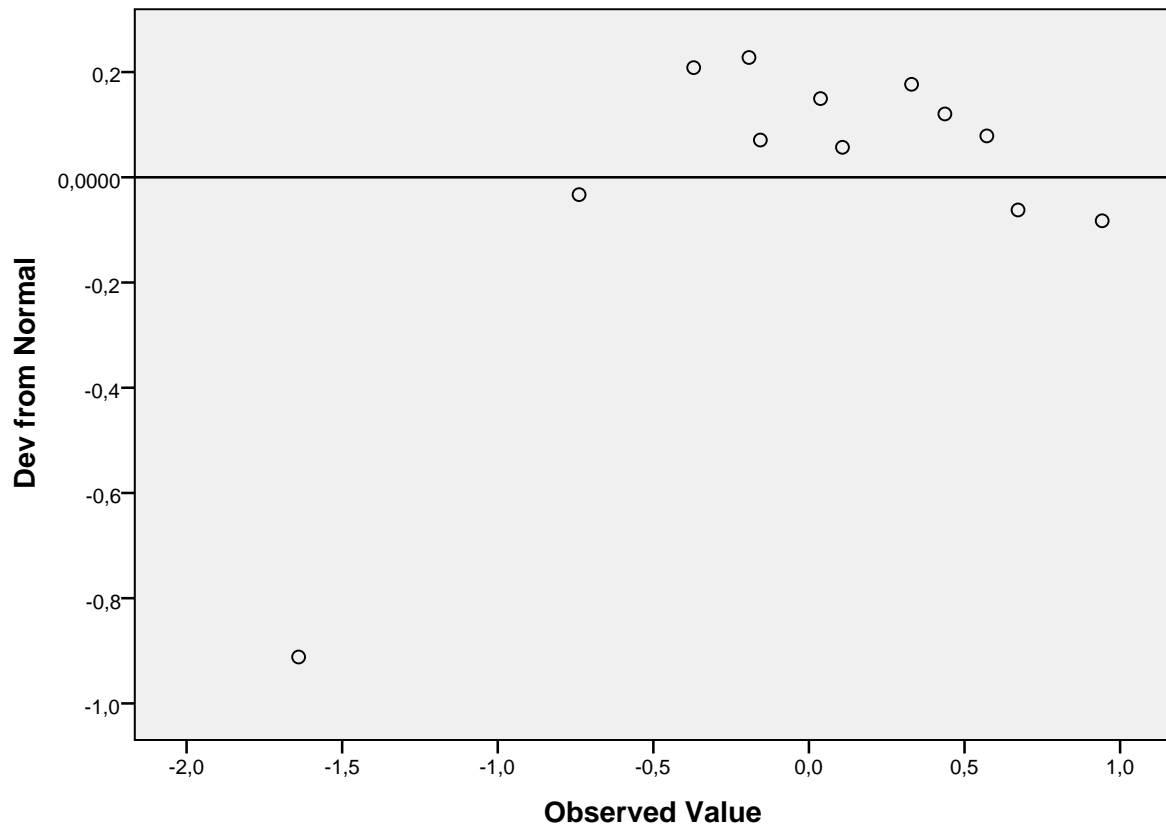

Treatment: PLA

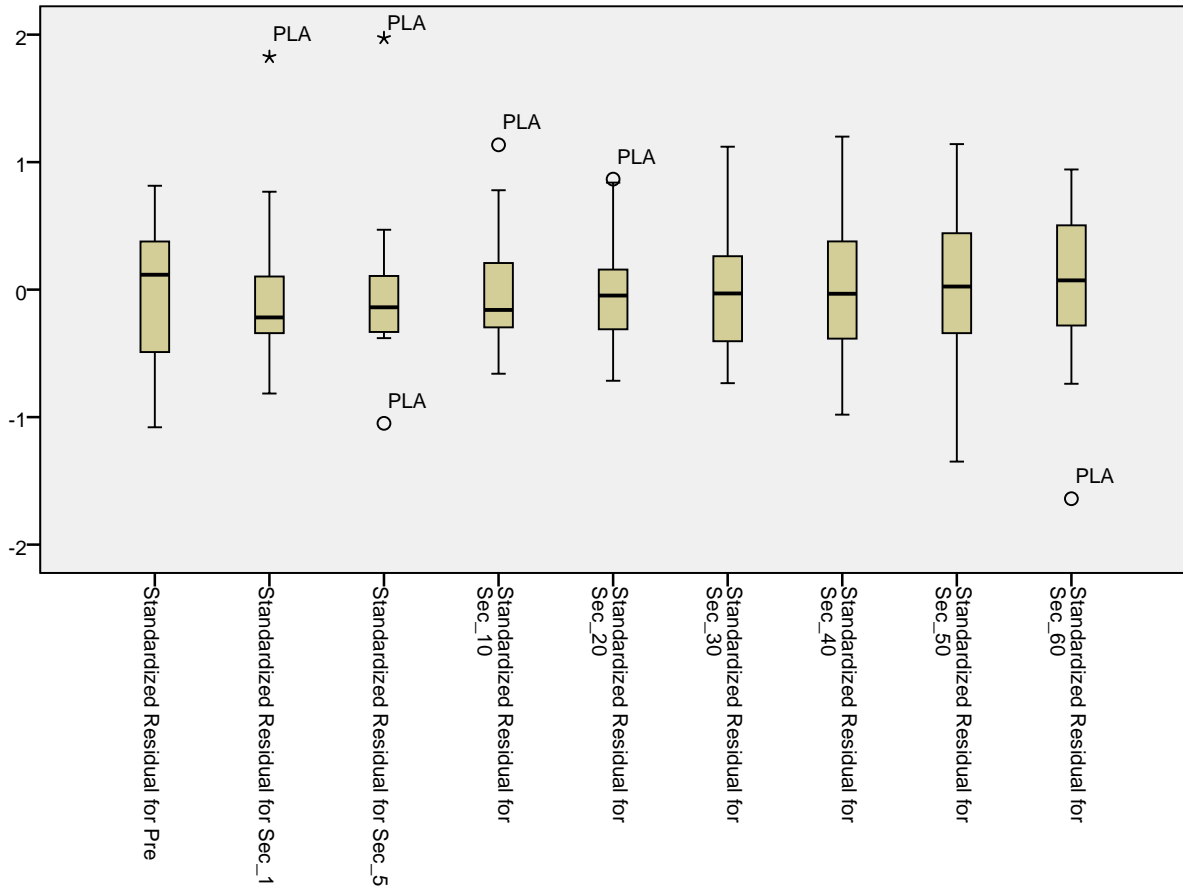

Normal Q-Q Plots of Standardized Residual for SmO<sub>2</sub> During Recovery

Normal Q-Q Plot of Standardized Residual for Pre

Treatment= BG

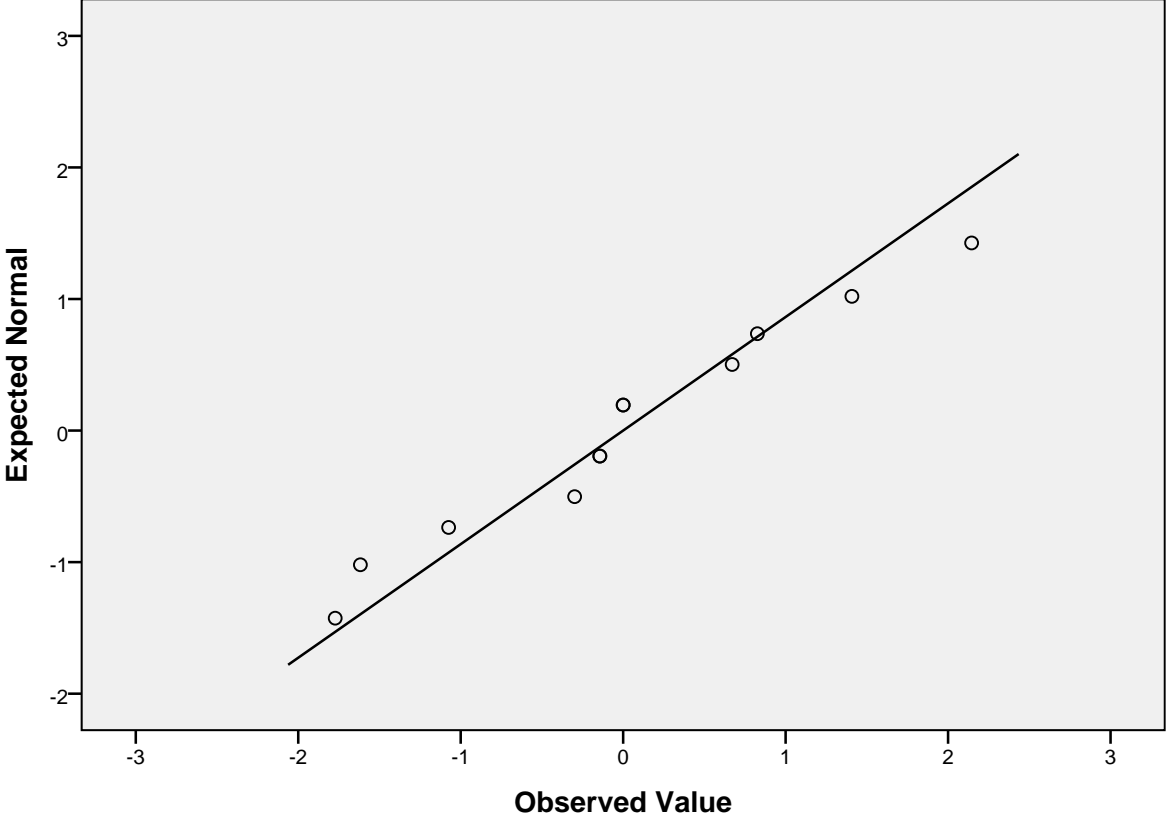

### Normal Q-Q Plot of Standardized Residual for Post

Treatment= BG

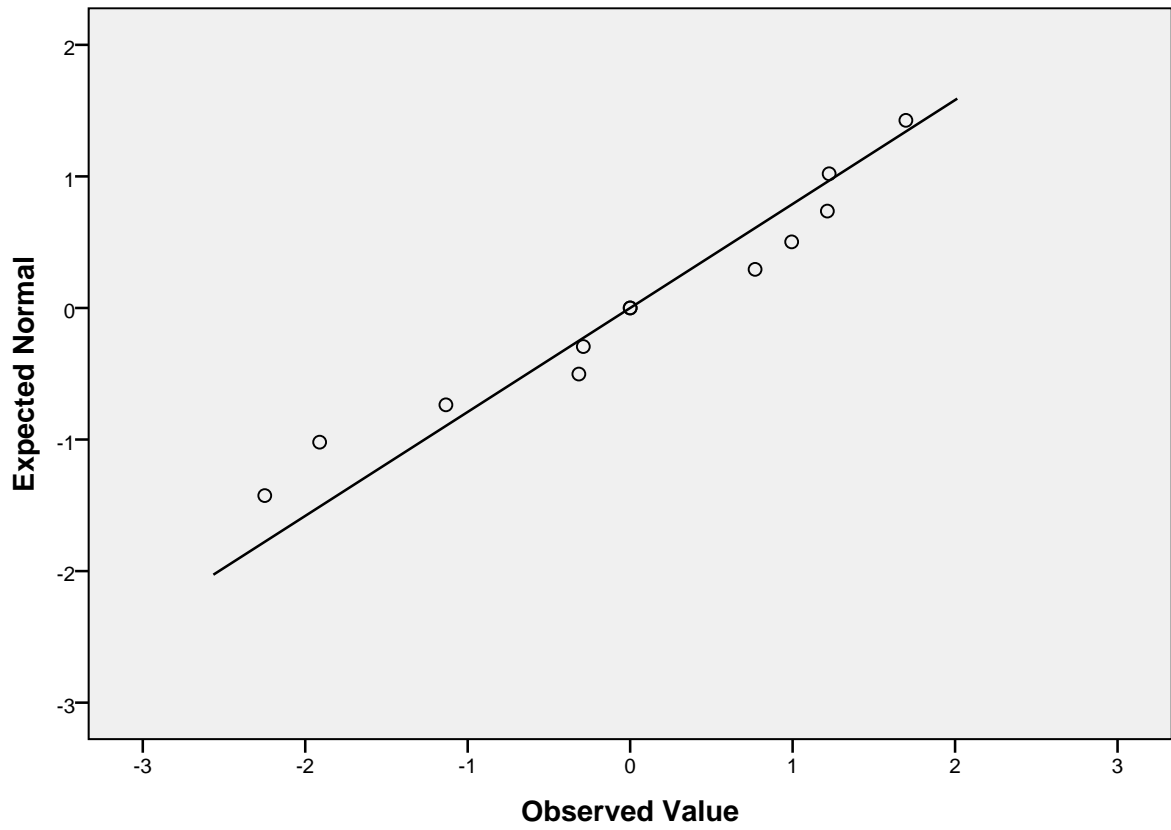



### Normal Q-Q Plot of Standardized Residual for Sec\_1

Treatment= BG

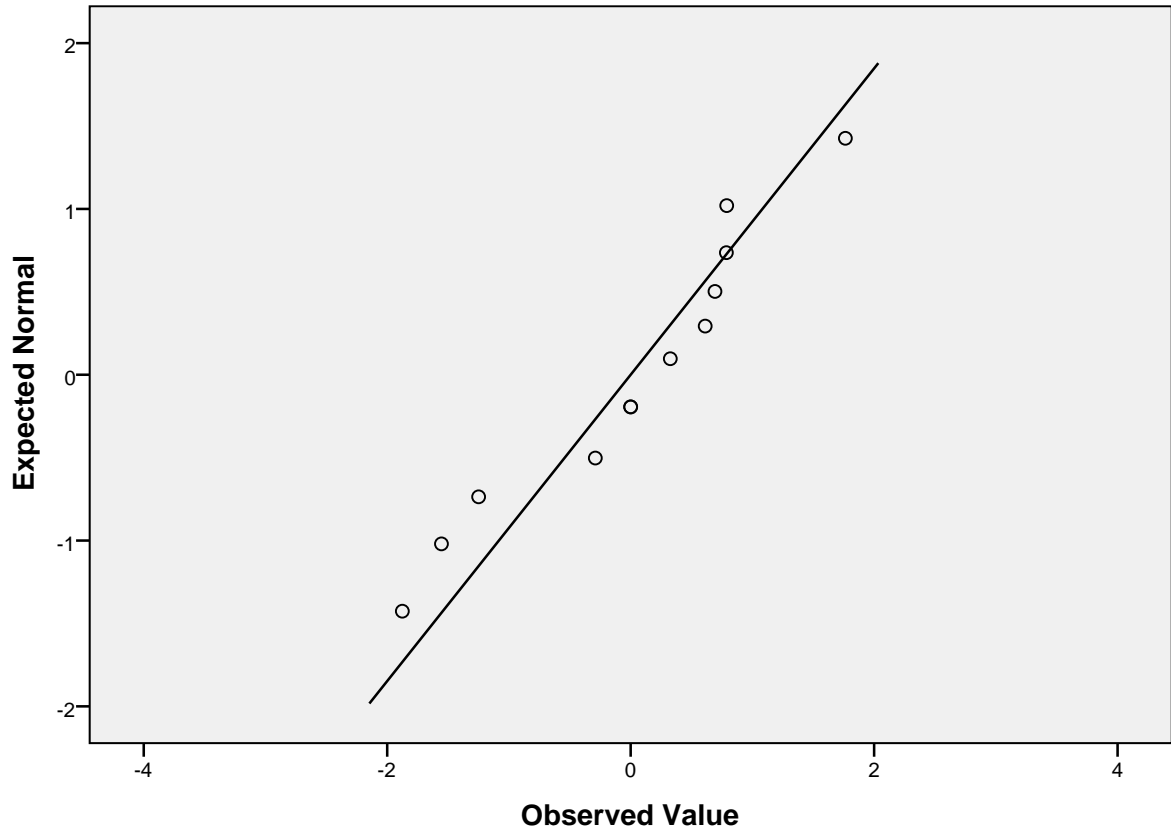

### Normal Q-Q Plot of Standardized Residual for Sec\_5

Treatment= BG

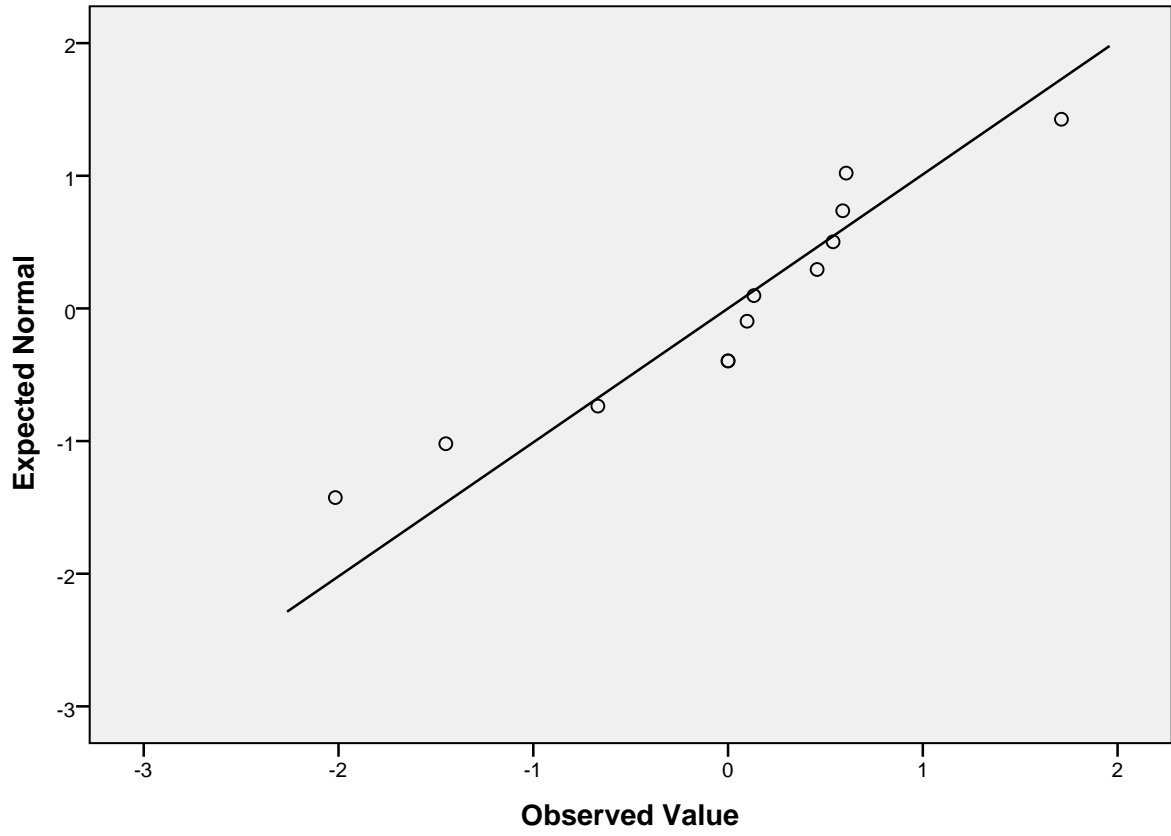

### Normal Q-Q Plot of Standardized Residual for Sec\_10

Treatment= BG

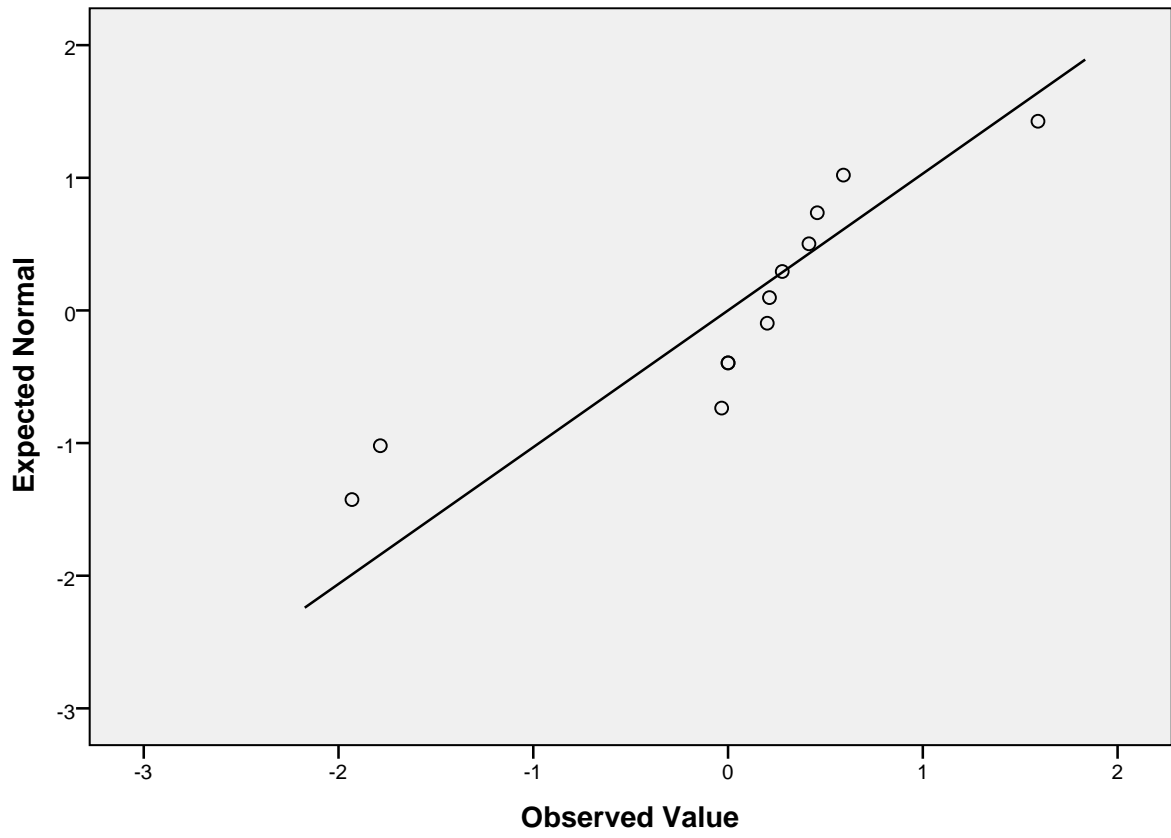

### Normal Q-Q Plot of Standardized Residual for Sec\_20

Treatment= BG

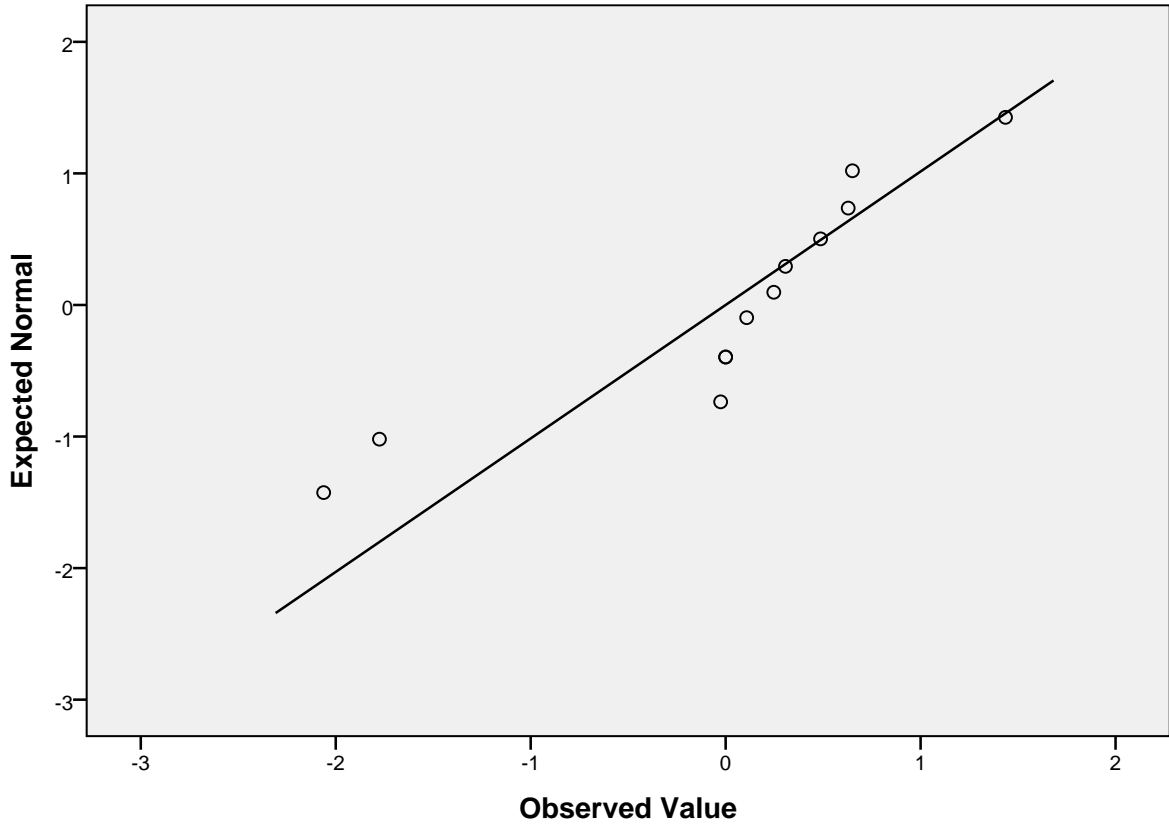

### Normal Q-Q Plot of Standardized Residual for Sec\_30

Treatment= BG

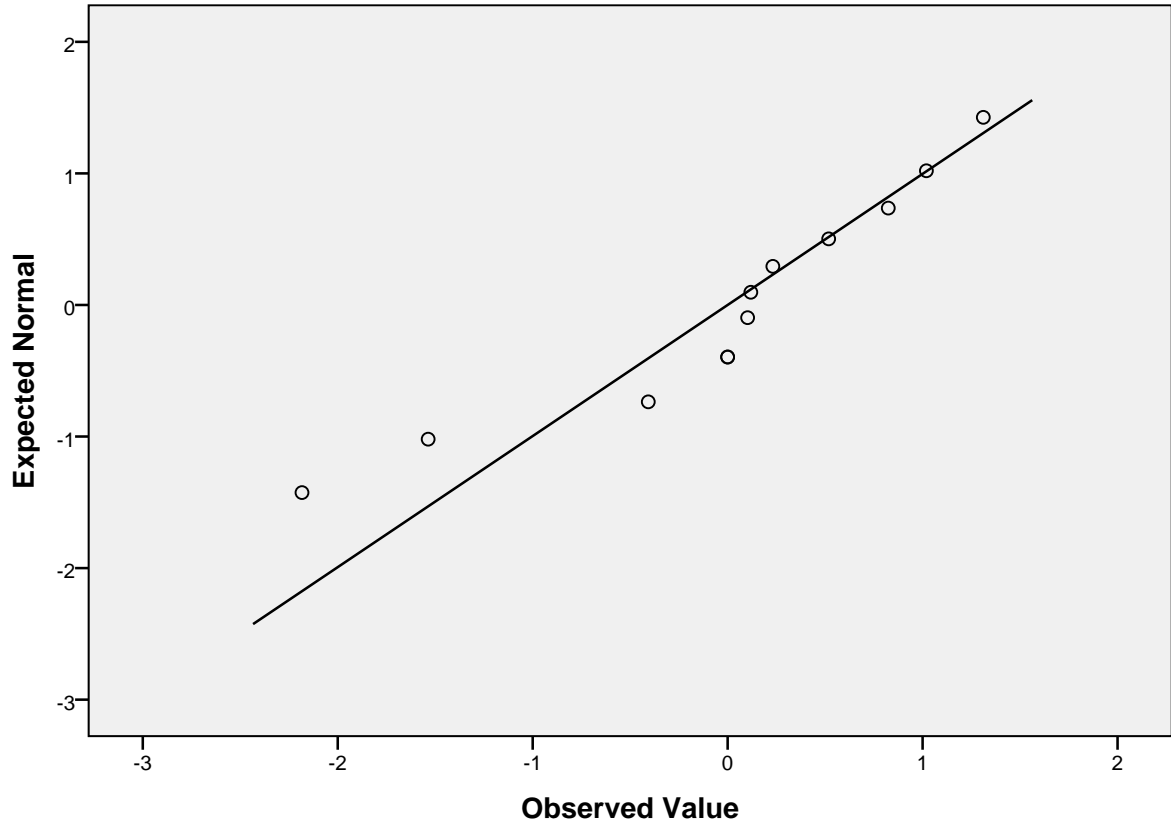

### Normal Q-Q Plot of Standardized Residual for Sec\_40

Treatment= BG

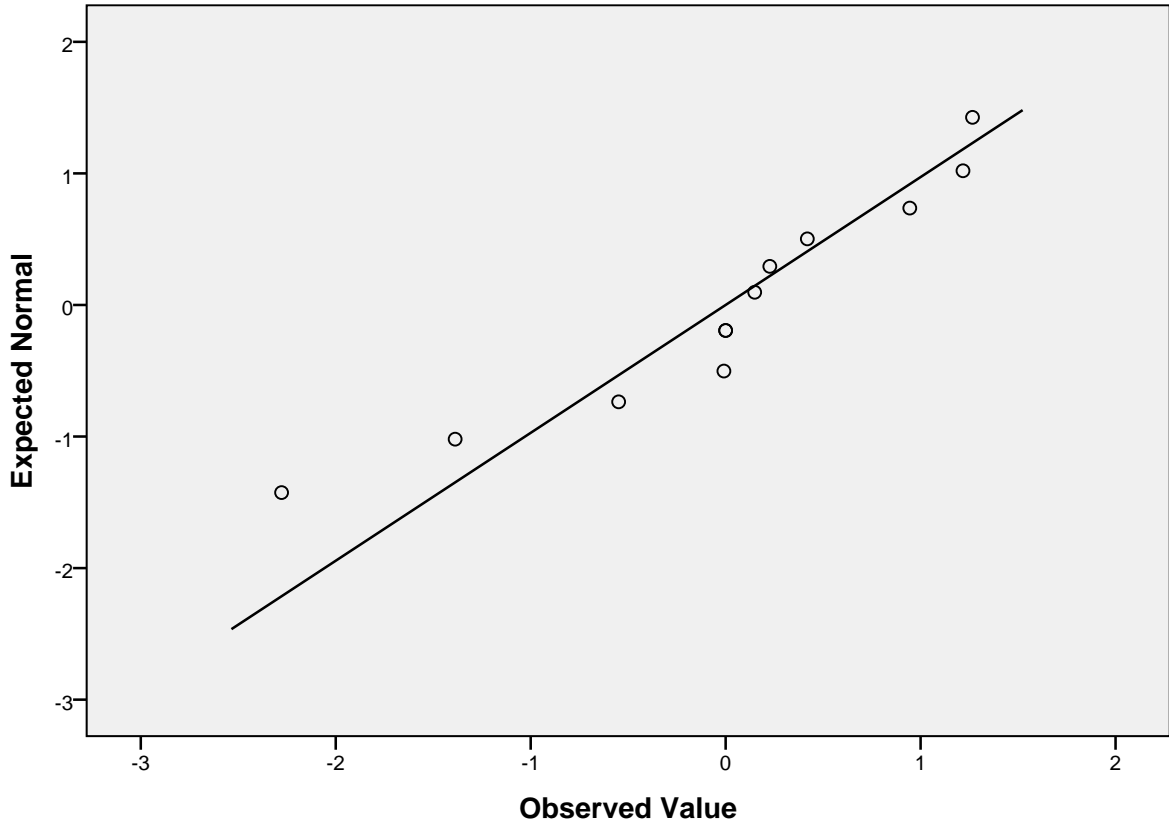

### Normal Q-Q Plot of Standardized Residual for Sec\_50

Treatment= BG

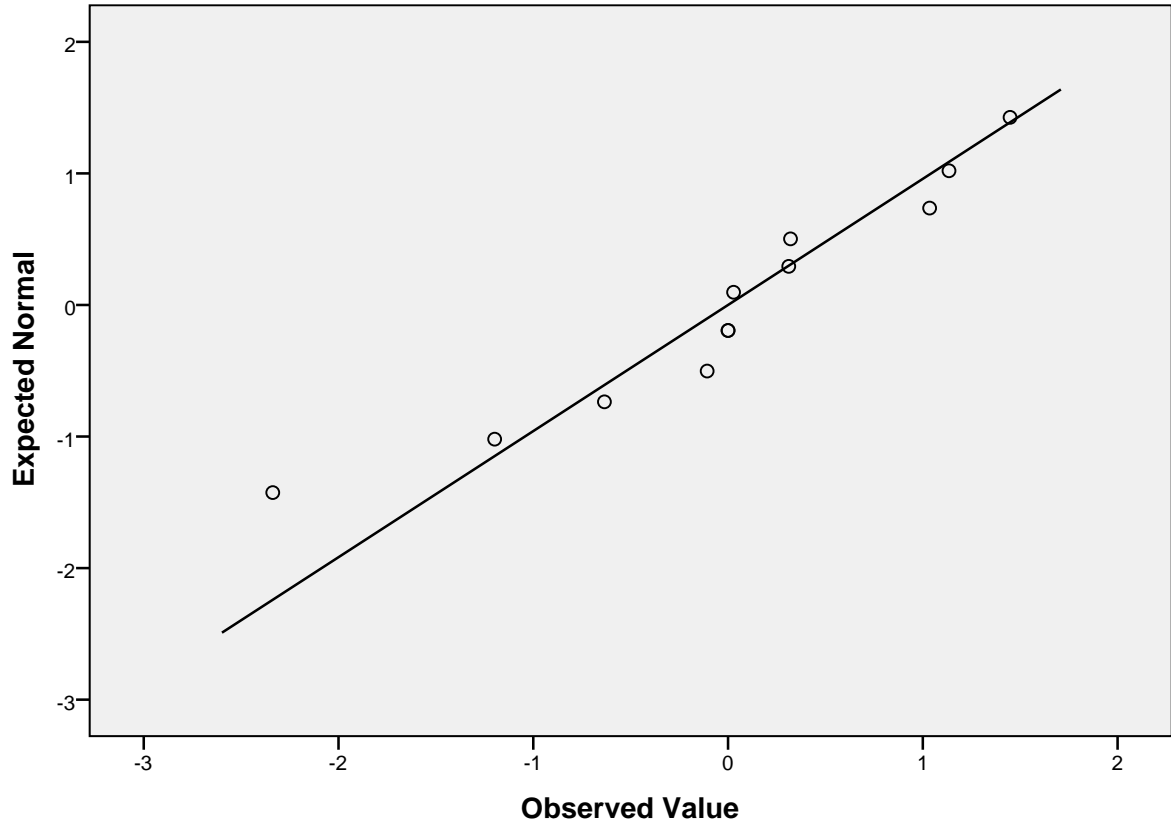

### Normal Q-Q Plot of Standardized Residual for Sec\_60

Treatment= BG

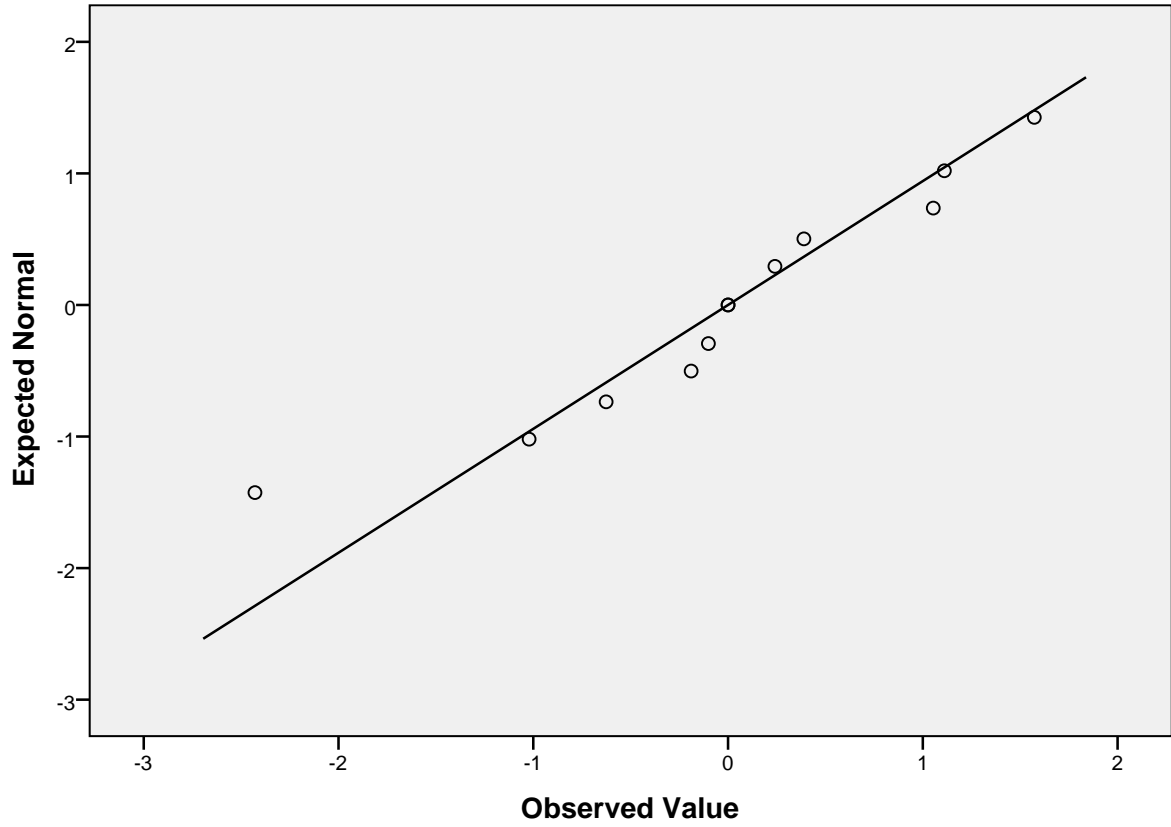



**Detrended Normal Q-Q Plot of Standardized Residual for Pre**

Treatment= BG

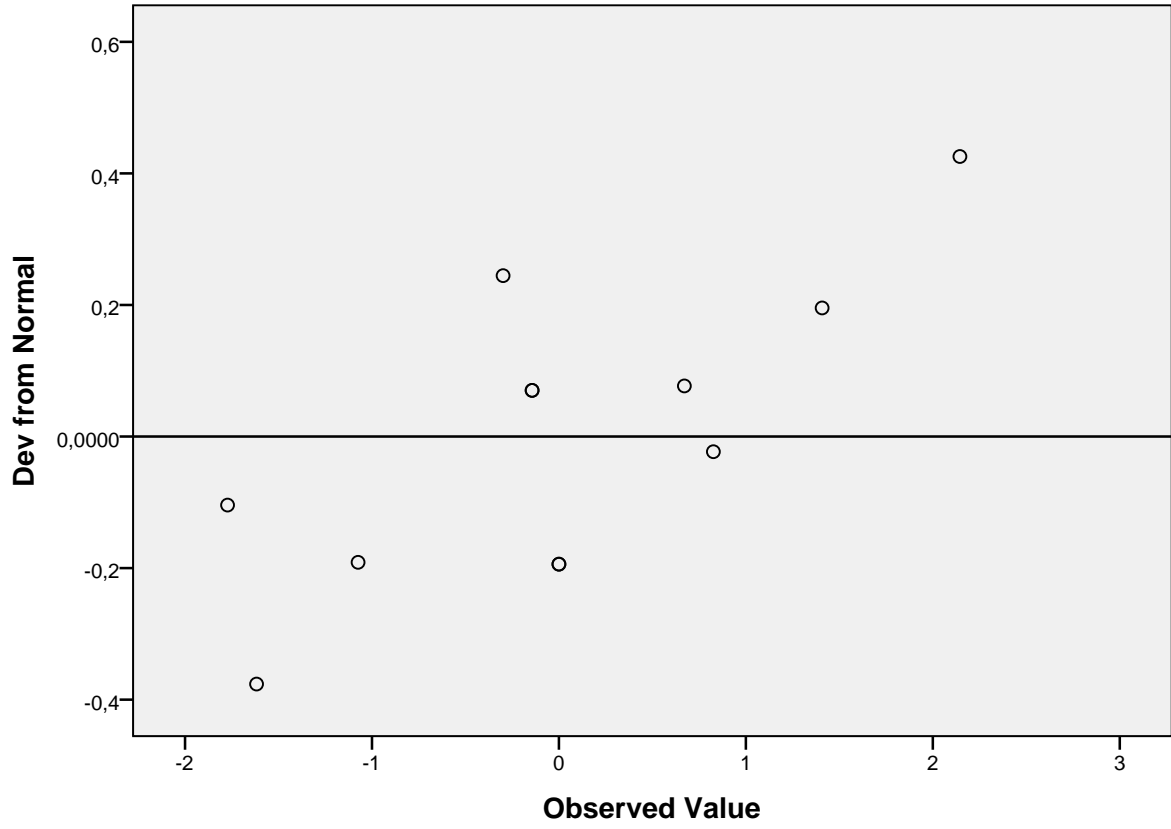

### Detrended Normal Q-Q Plot of Standardized Residual for Post

Treatment= BG

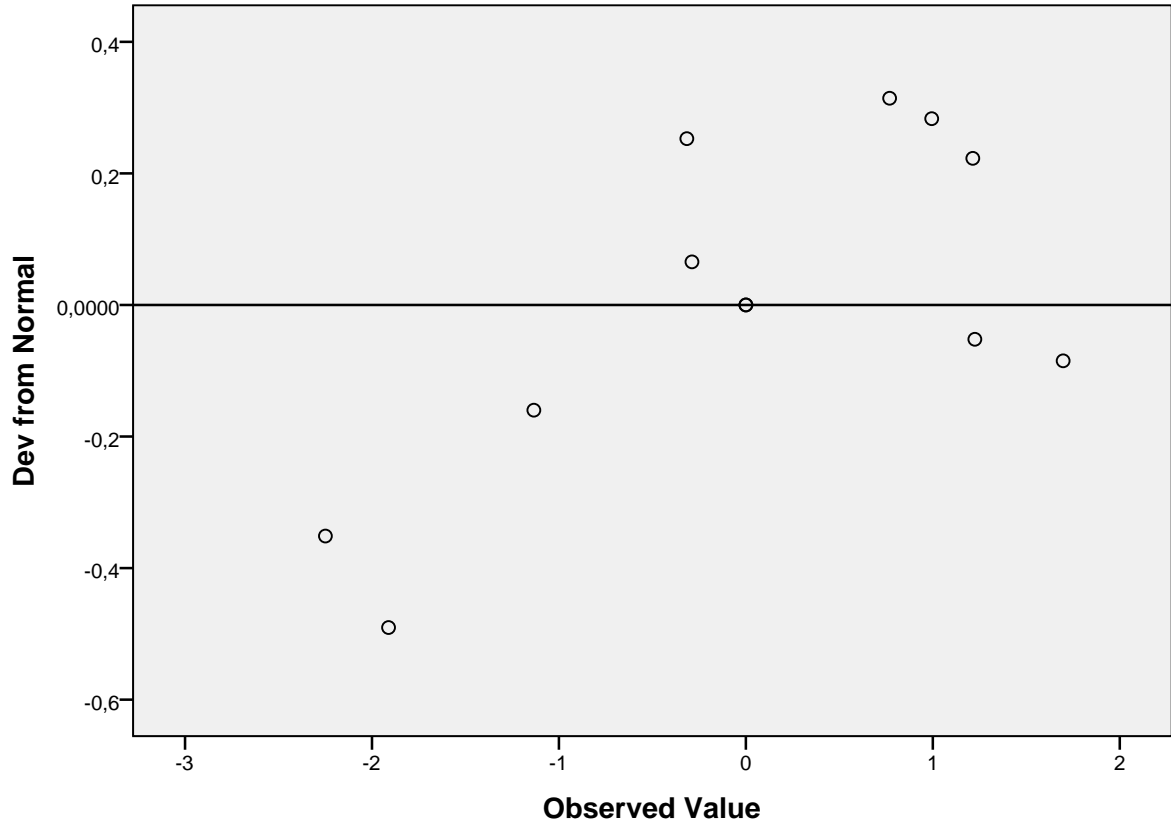

### Detrended Normal Q-Q Plot of Standardized Residual for Sec\_1

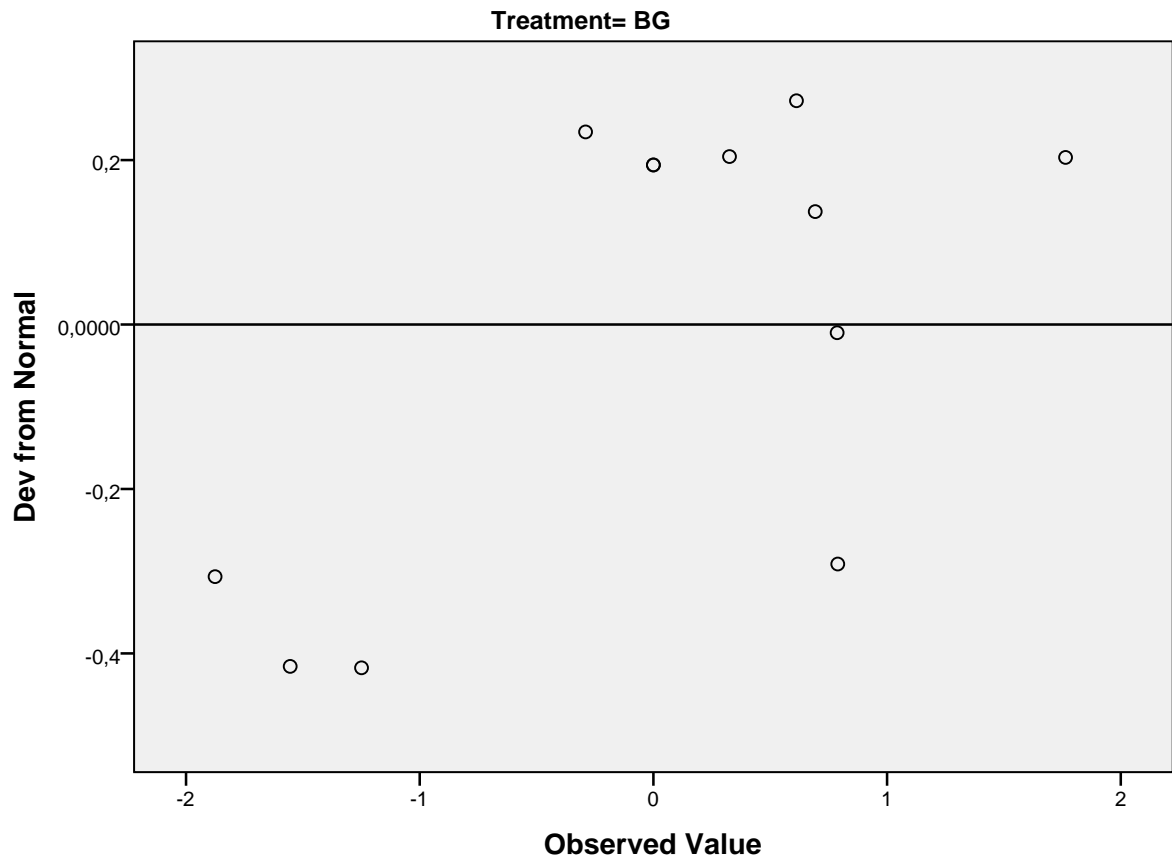

### Detrended Normal Q-Q Plot of Standardized Residual for Sec\_5

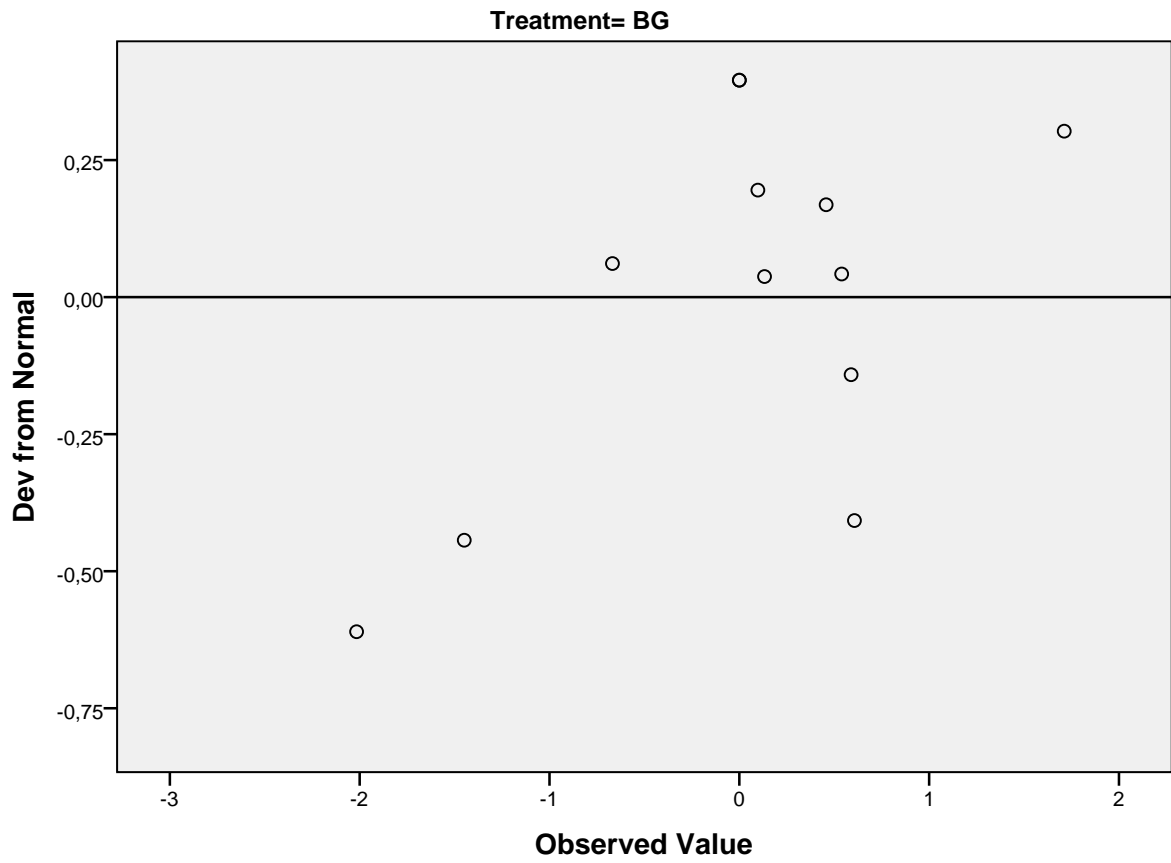

### Detrended Normal Q-Q Plot of Standardized Residual for Sec\_10

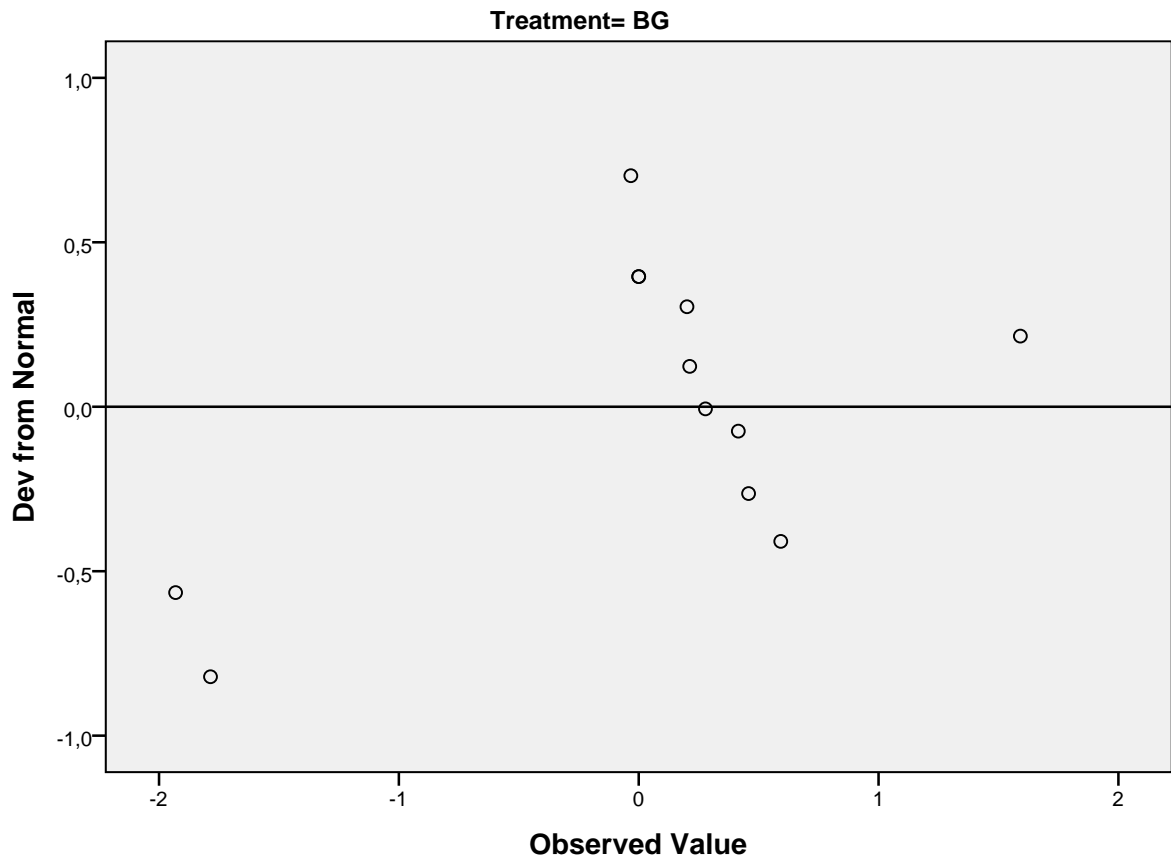

### Detrended Normal Q-Q Plot of Standardized Residual for Sec\_20

Treatment= BG

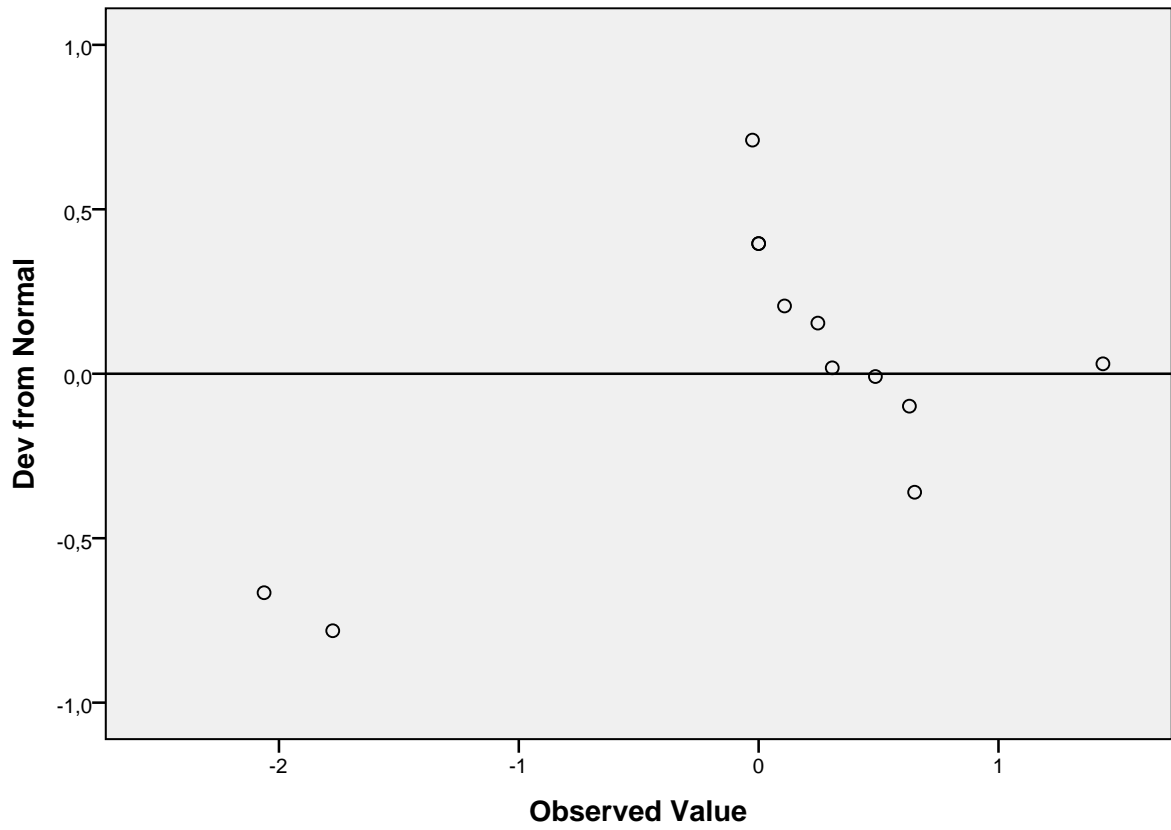

### Detrended Normal Q-Q Plot of Standardized Residual for Sec\_30

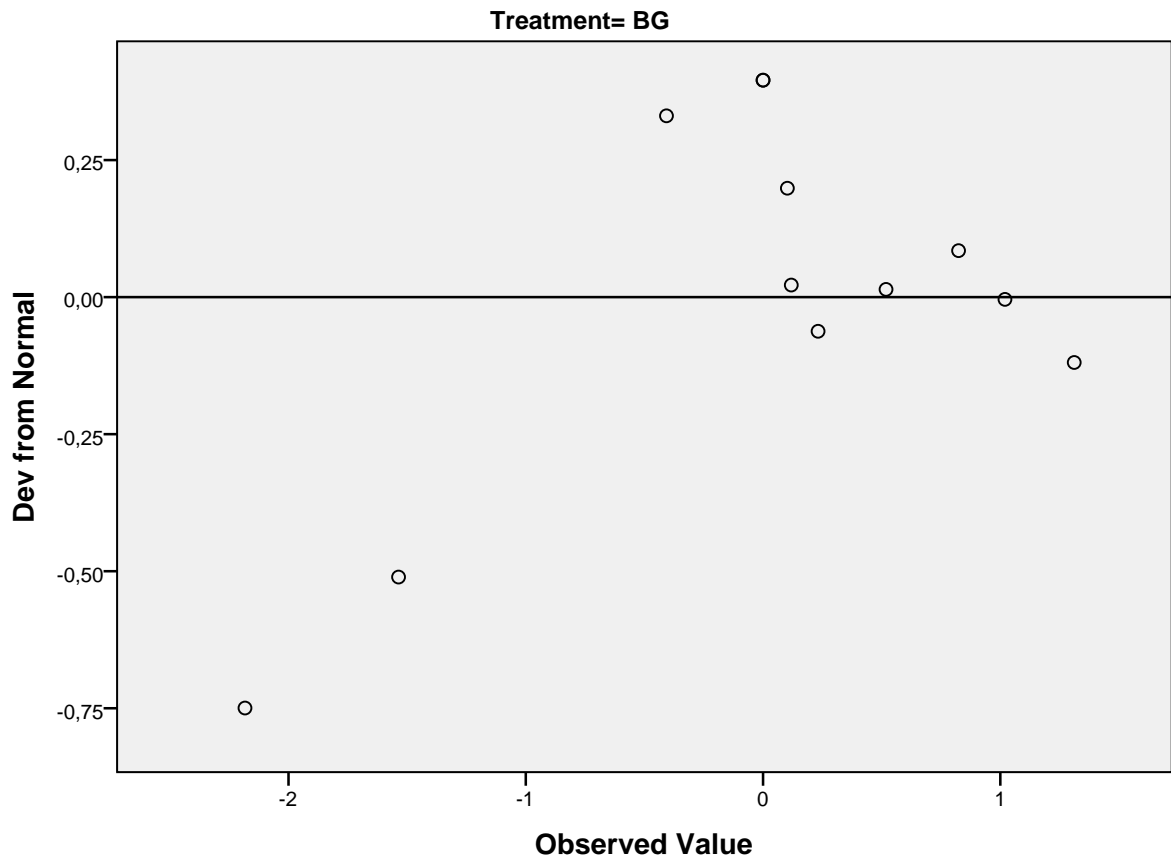

### Detrended Normal Q-Q Plot of Standardized Residual for Sec\_40

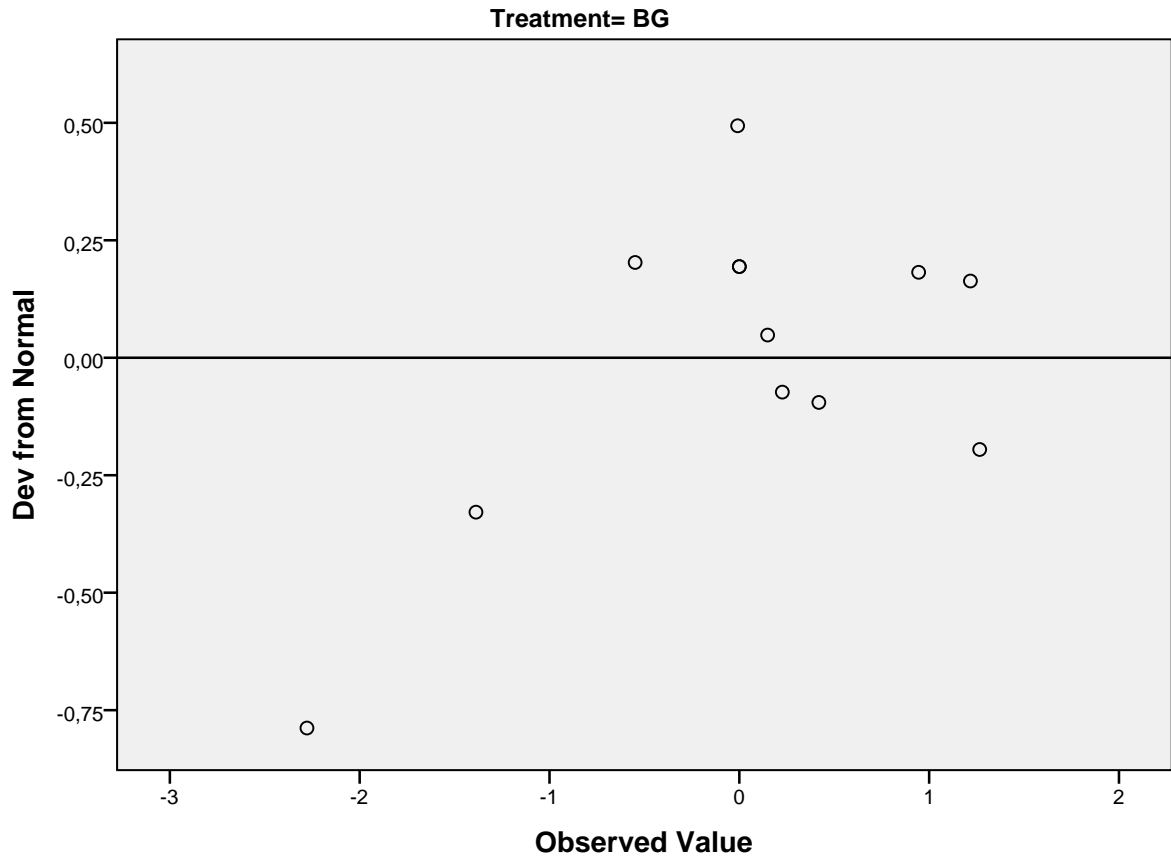



### Detrended Normal Q-Q Plot of Standardized Residual for Sec\_50

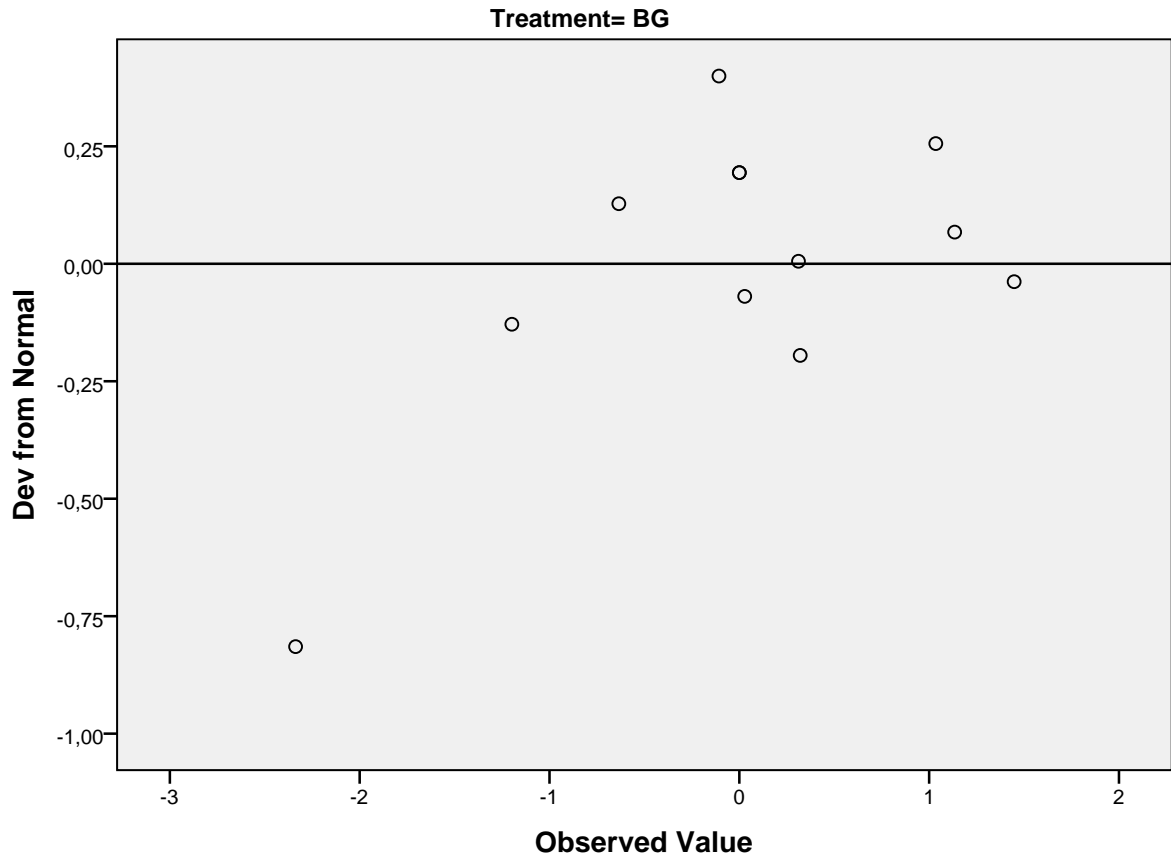

### Detrended Normal Q-Q Plot of Standardized Residual for Sec\_60

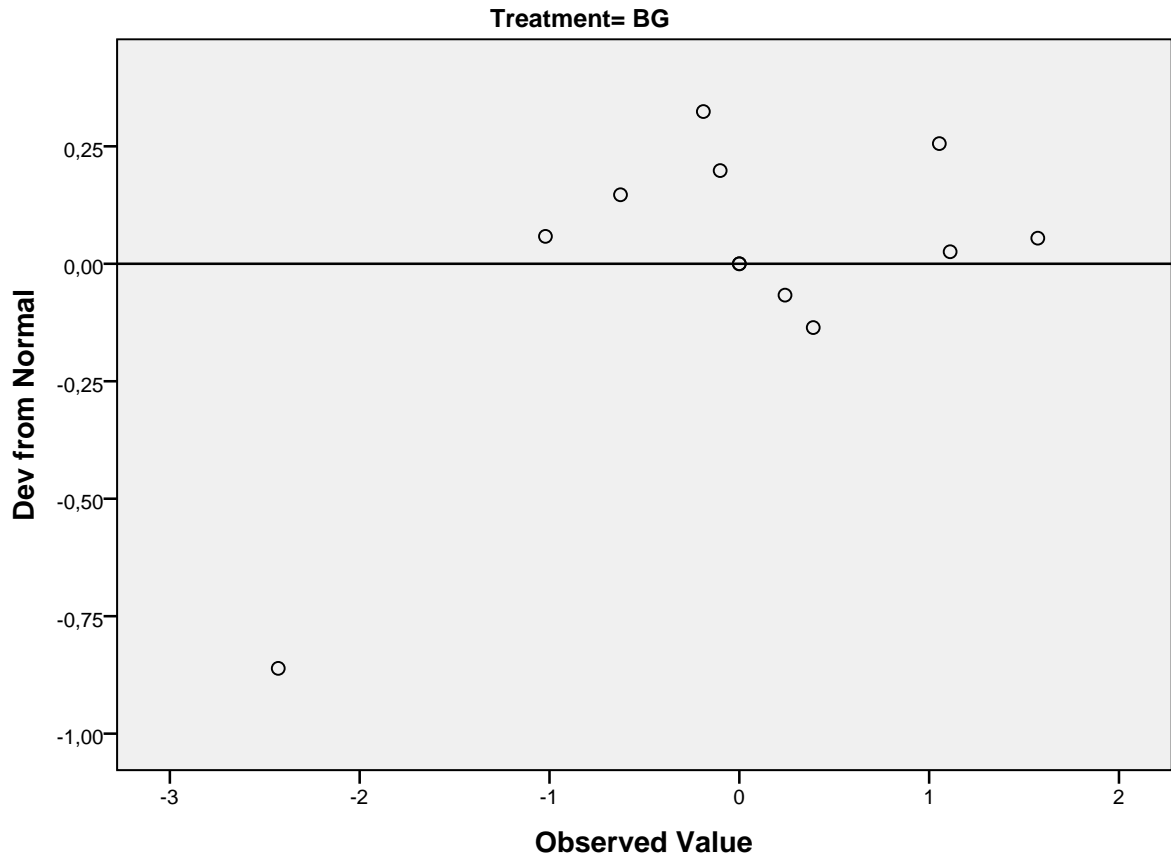

Treatment: BG

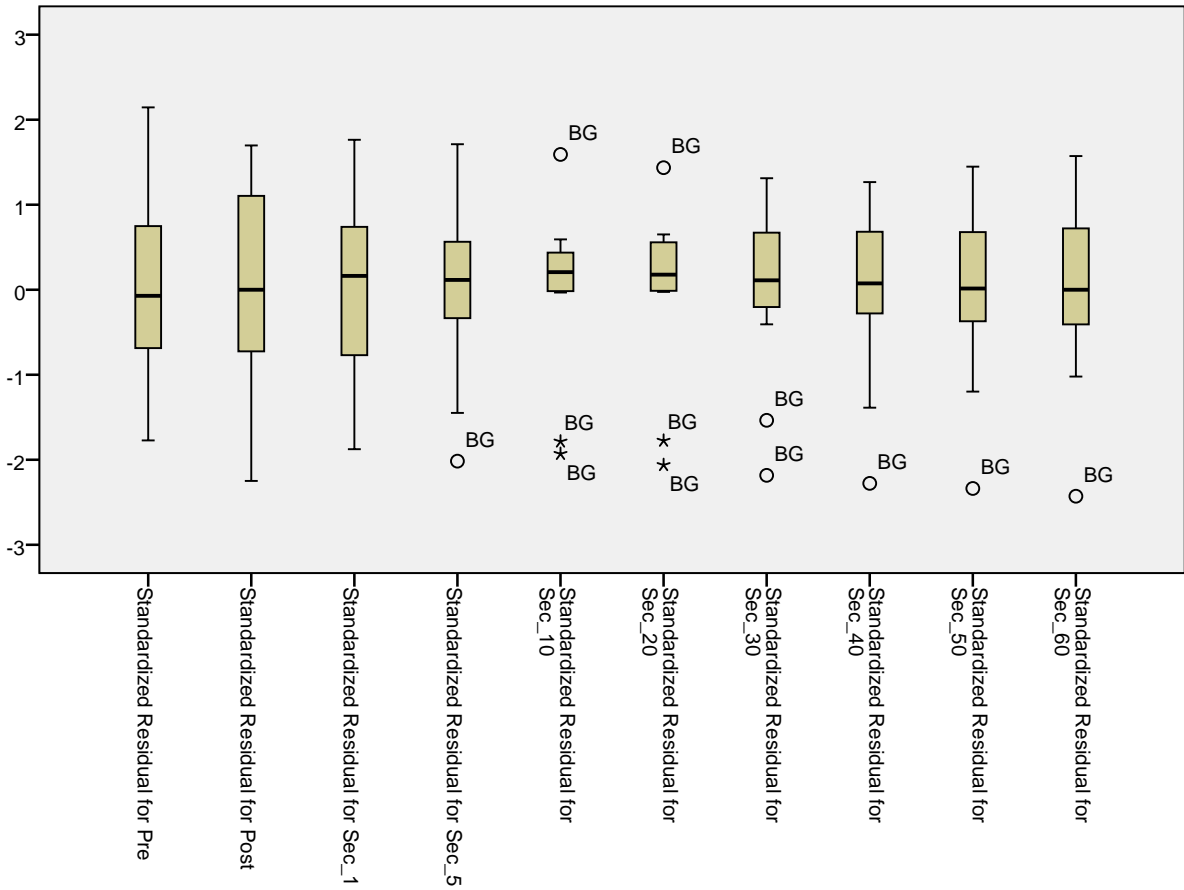

### Normal Q-Q Plot of Standardized Residual for Pre

Treatment= PLA

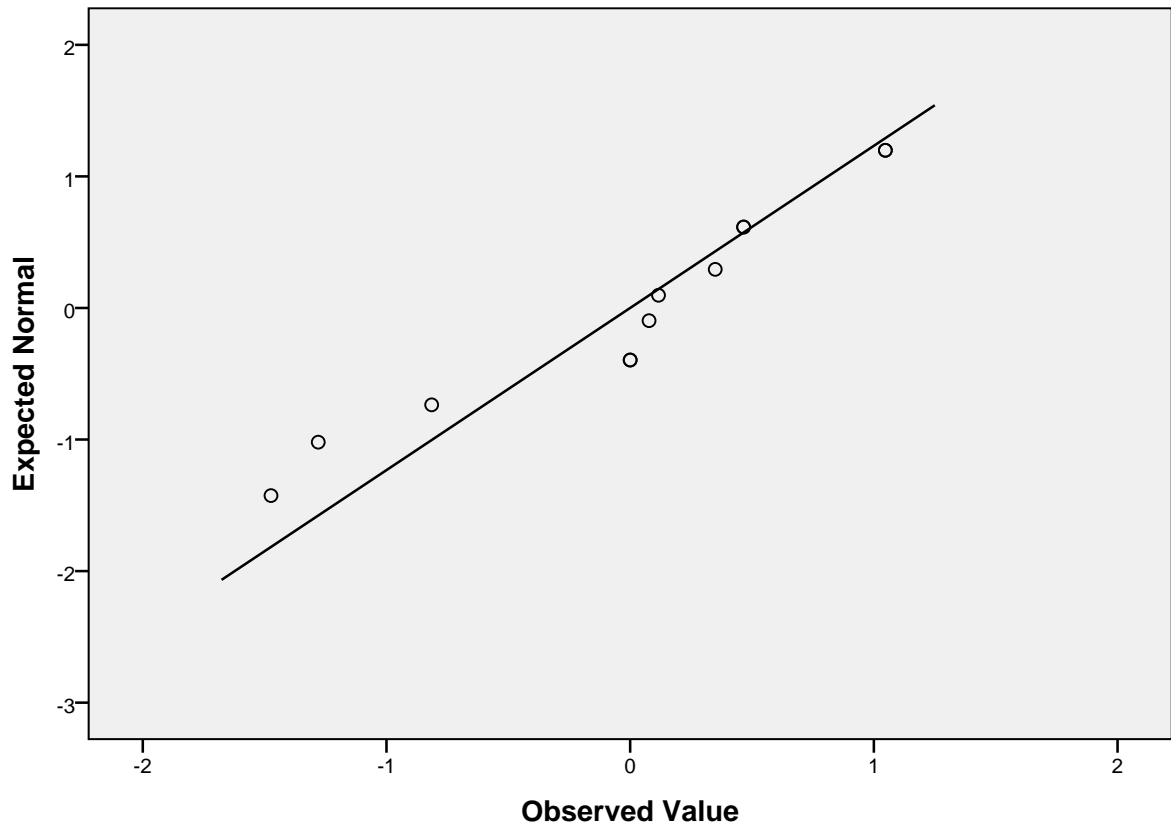

### Normal Q-Q Plot of Standardized Residual for Post

Treatment= PLA

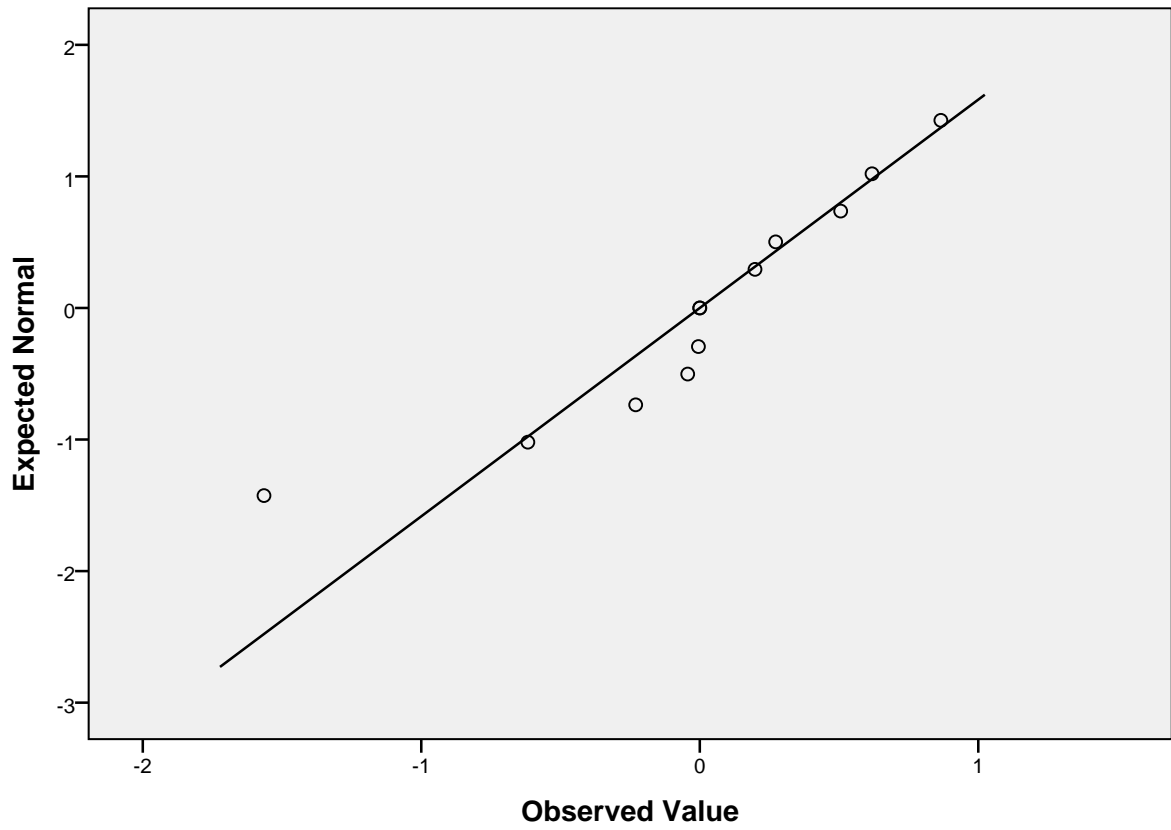

### Normal Q-Q Plot of Standardized Residual for Sec\_1

Treatment= PLA

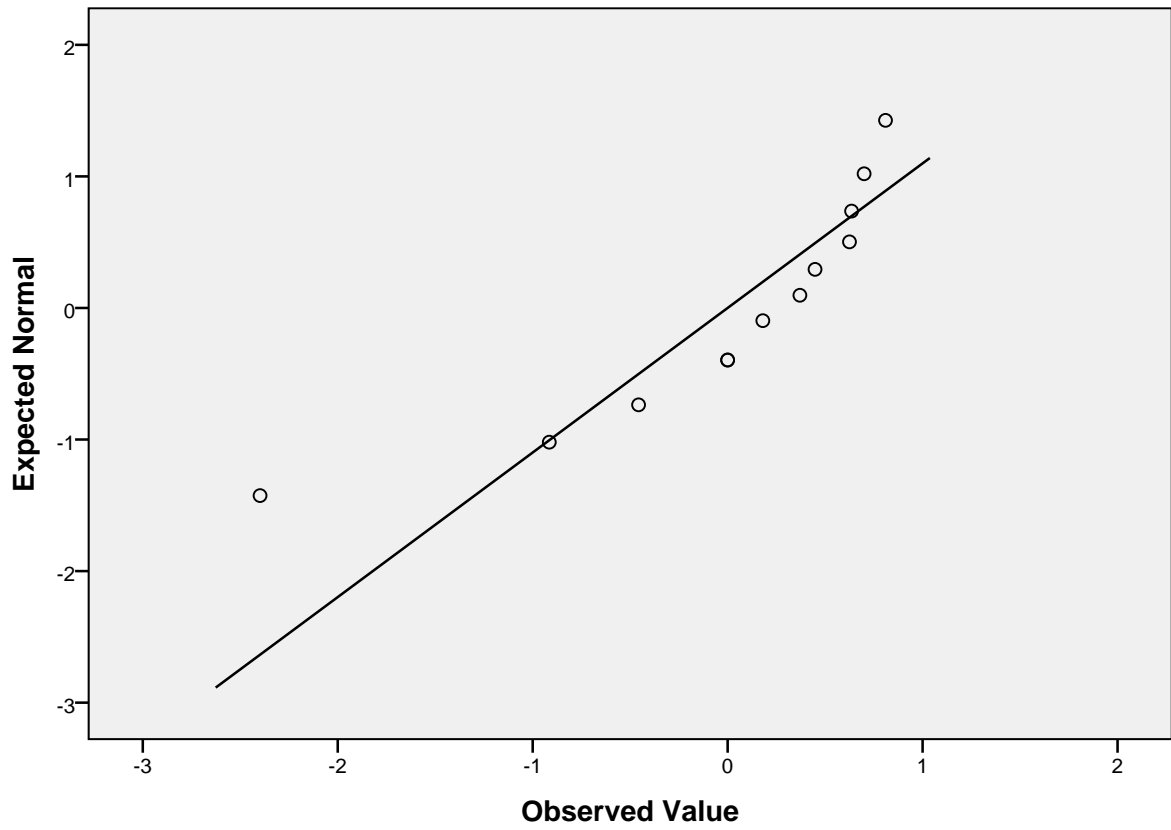

### Normal Q-Q Plot of Standardized Residual for Sec\_5

Treatment= PLA

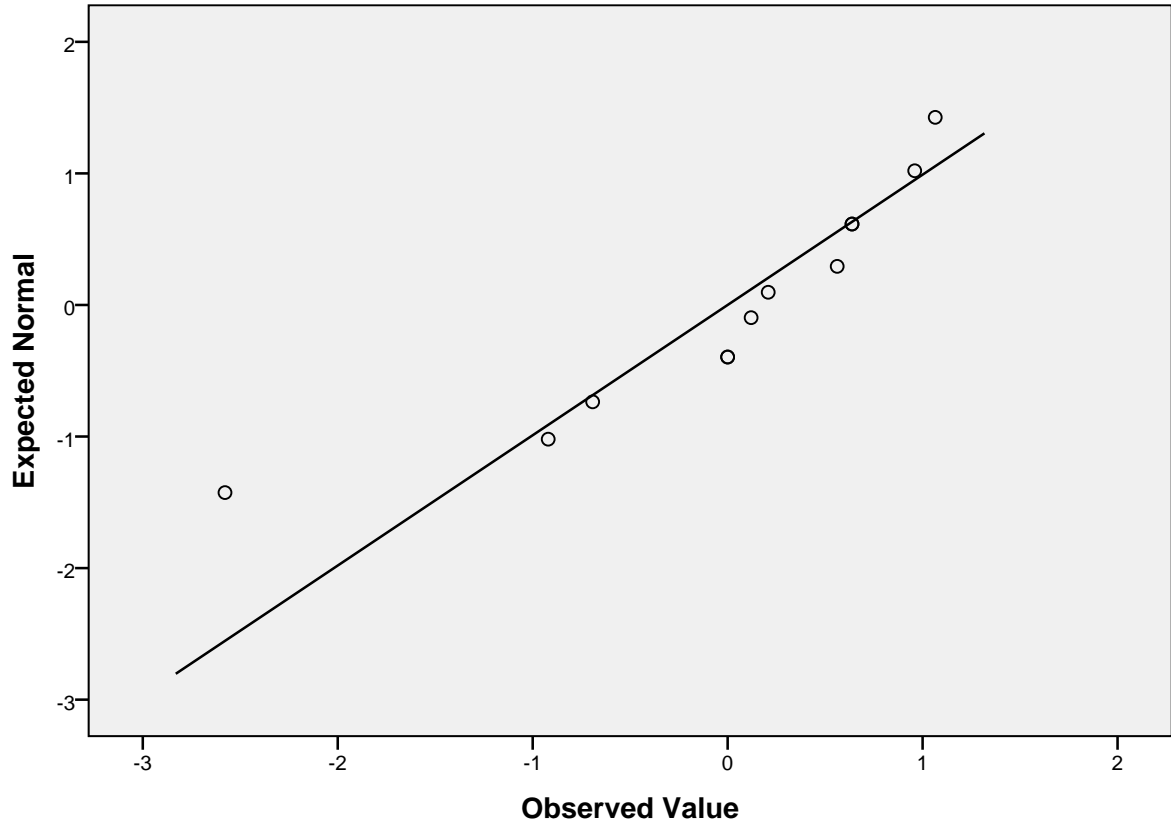

### Normal Q-Q Plot of Standardized Residual for Sec\_10

Treatment= PLA

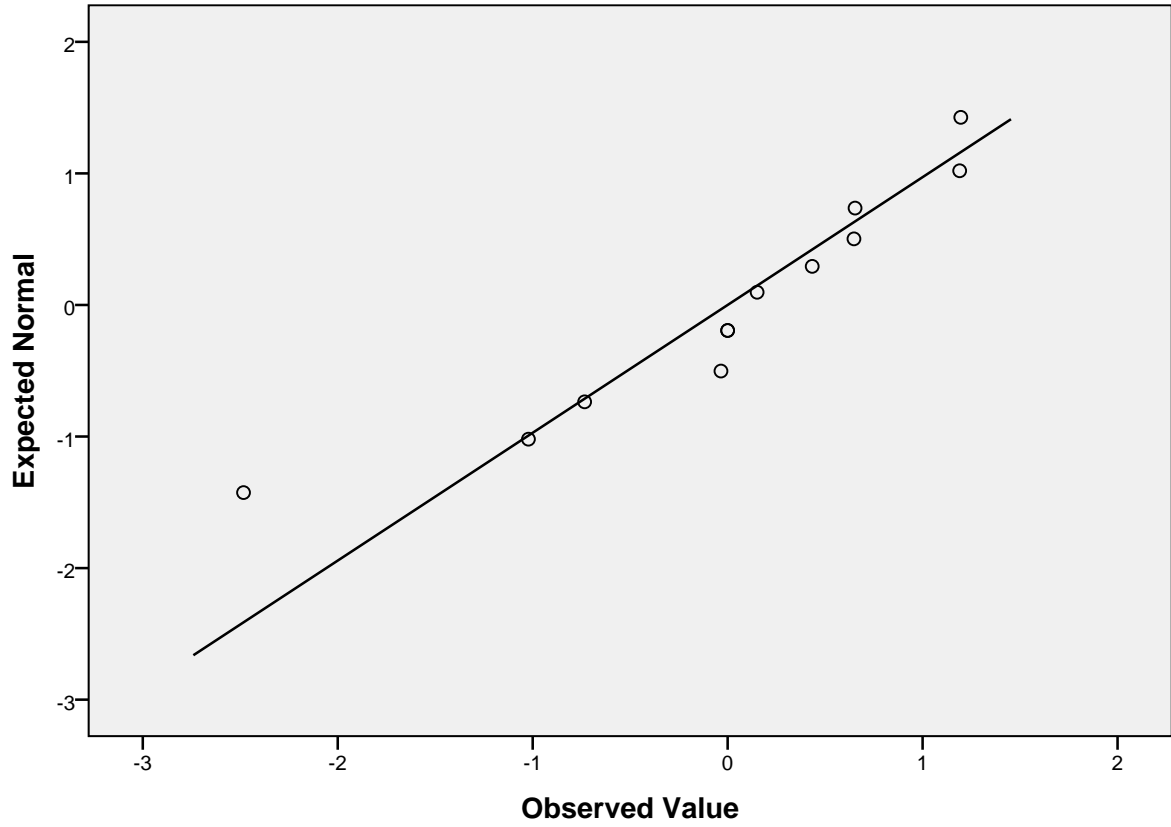



### Normal Q-Q Plot of Standardized Residual for Sec\_20

Treatment= PLA

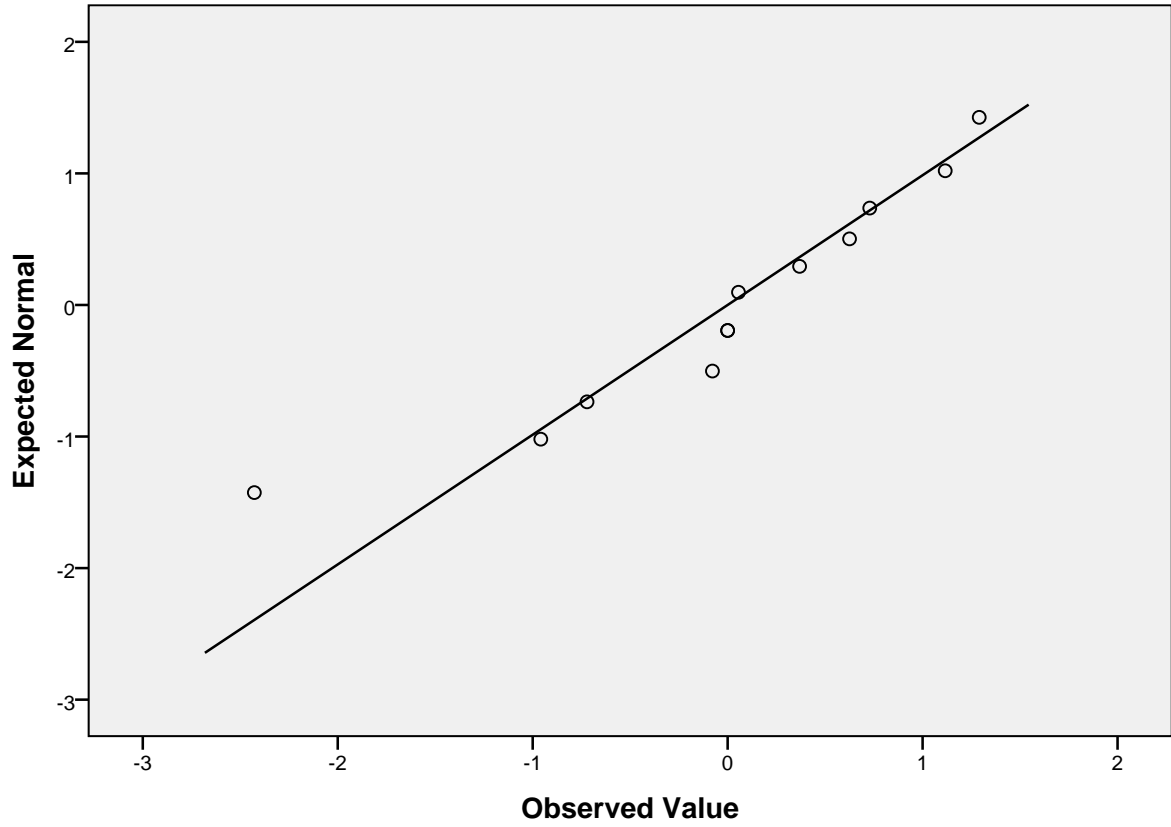

### Normal Q-Q Plot of Standardized Residual for Sec\_30

Treatment= PLA

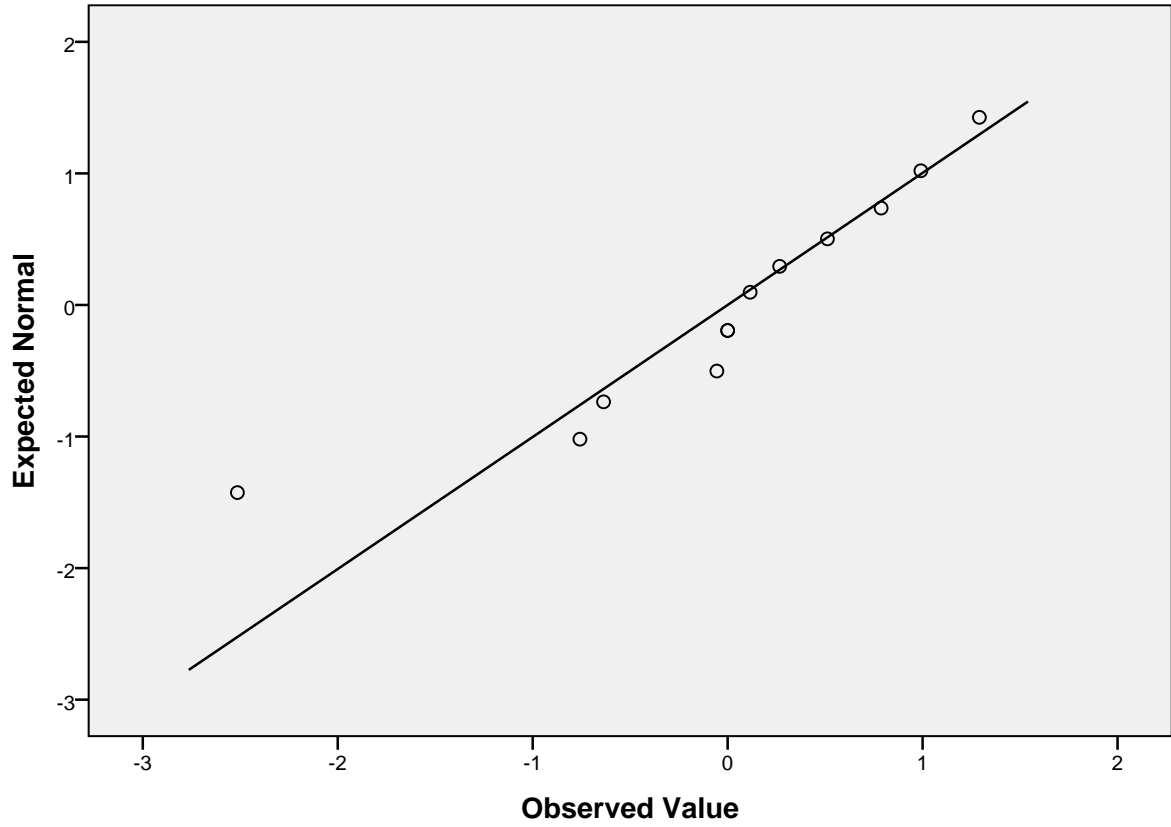

### Normal Q-Q Plot of Standardized Residual for Sec\_40

Treatment= PLA

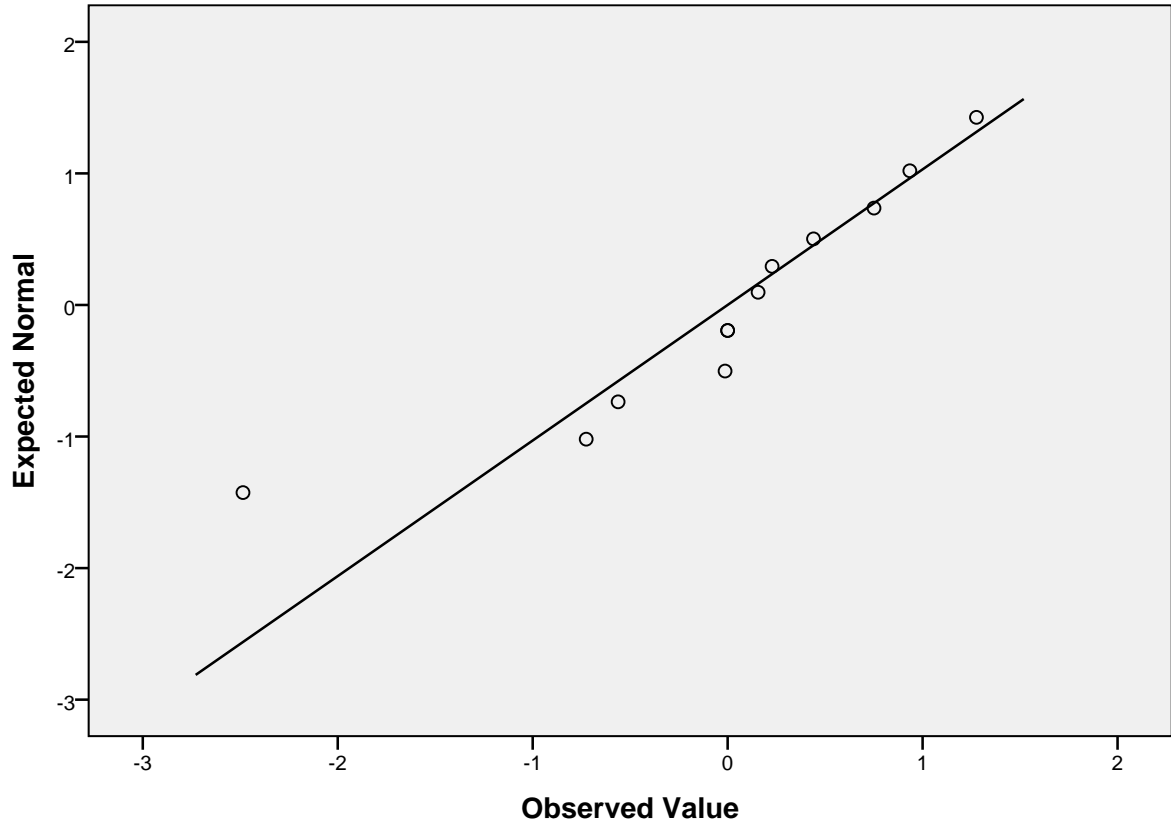

### Normal Q-Q Plot of Standardized Residual for Sec\_50

Treatment= PLA

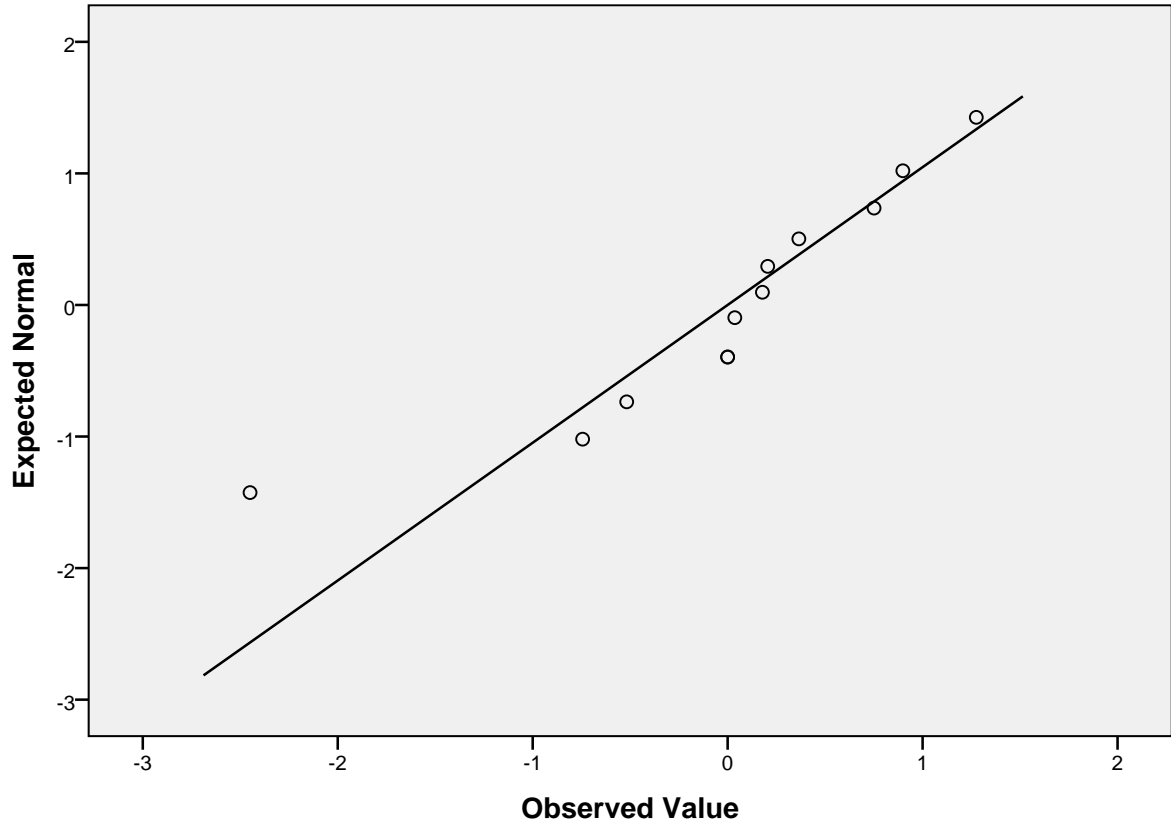

### Normal Q-Q Plot of Standardized Residual for Sec\_60

Treatment= PLA

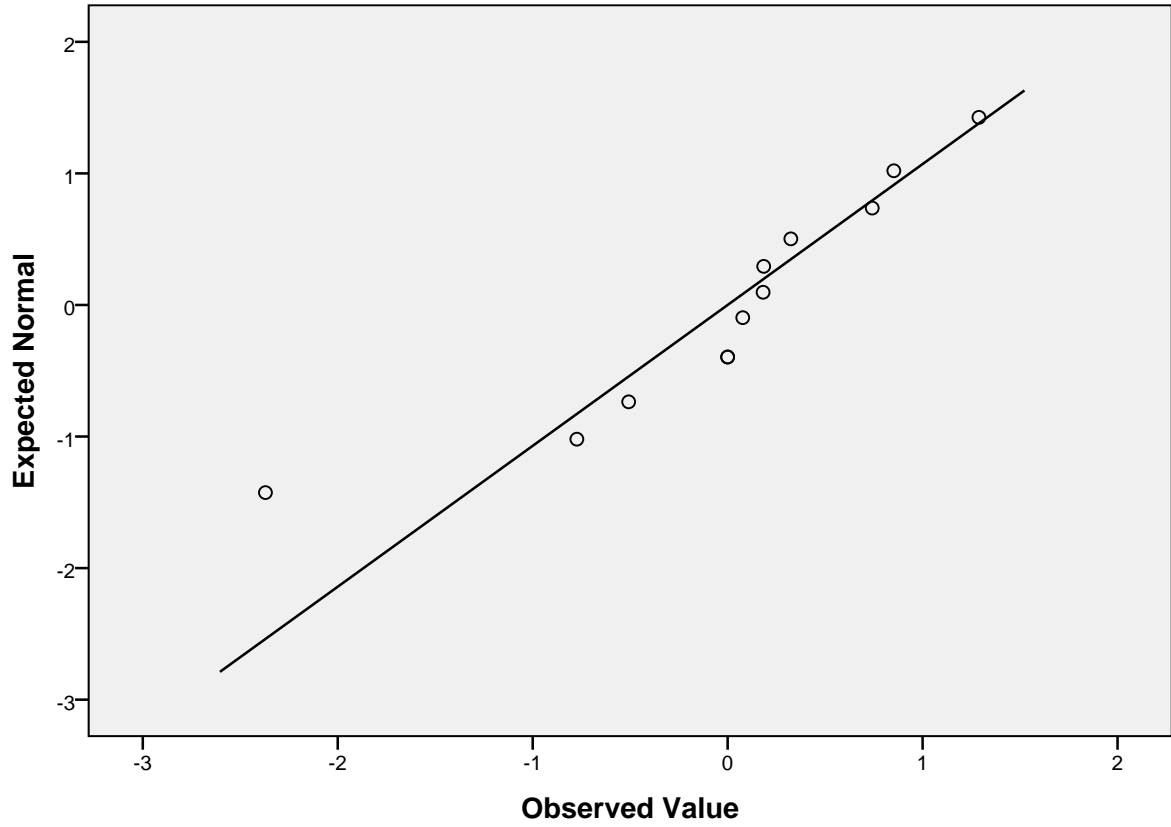

### Detrended Normal Q-Q Plot of Standardized Residual for Pre

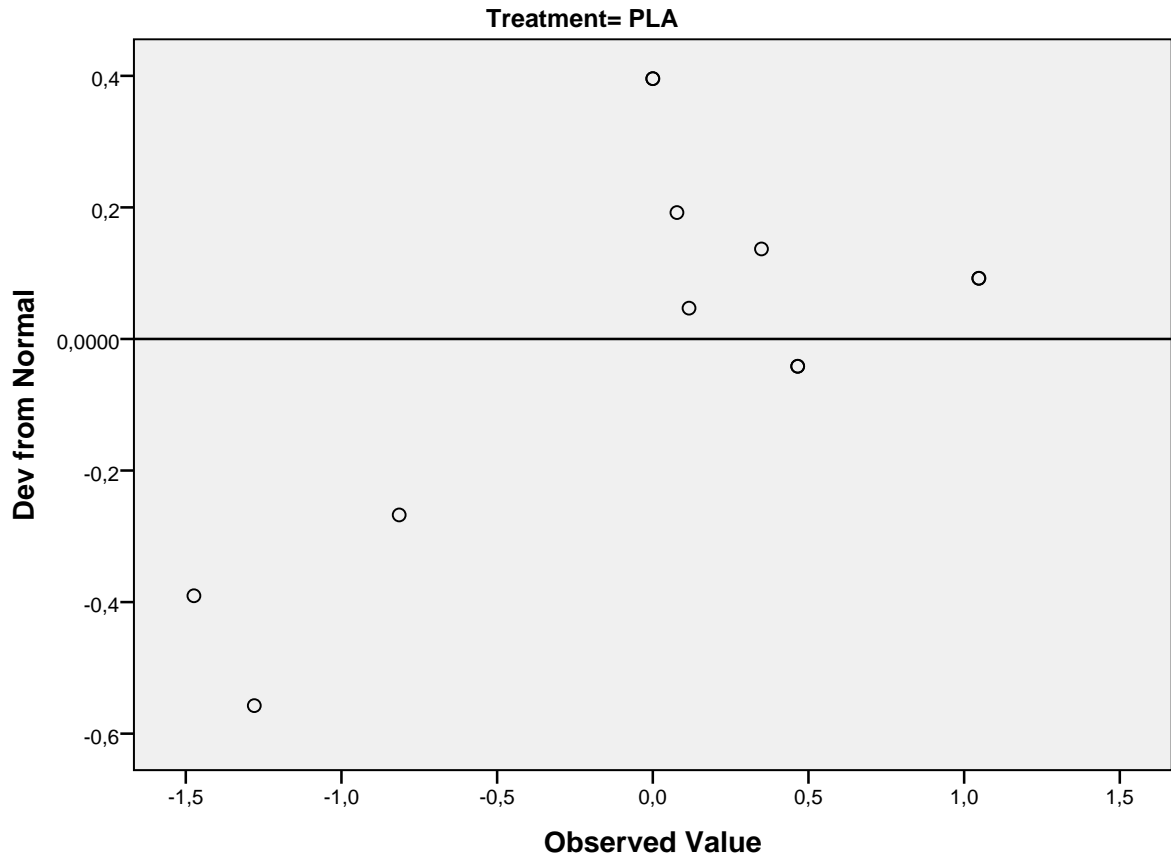

### Detrended Normal Q-Q Plot of Standardized Residual for Post

Treatment= PLA

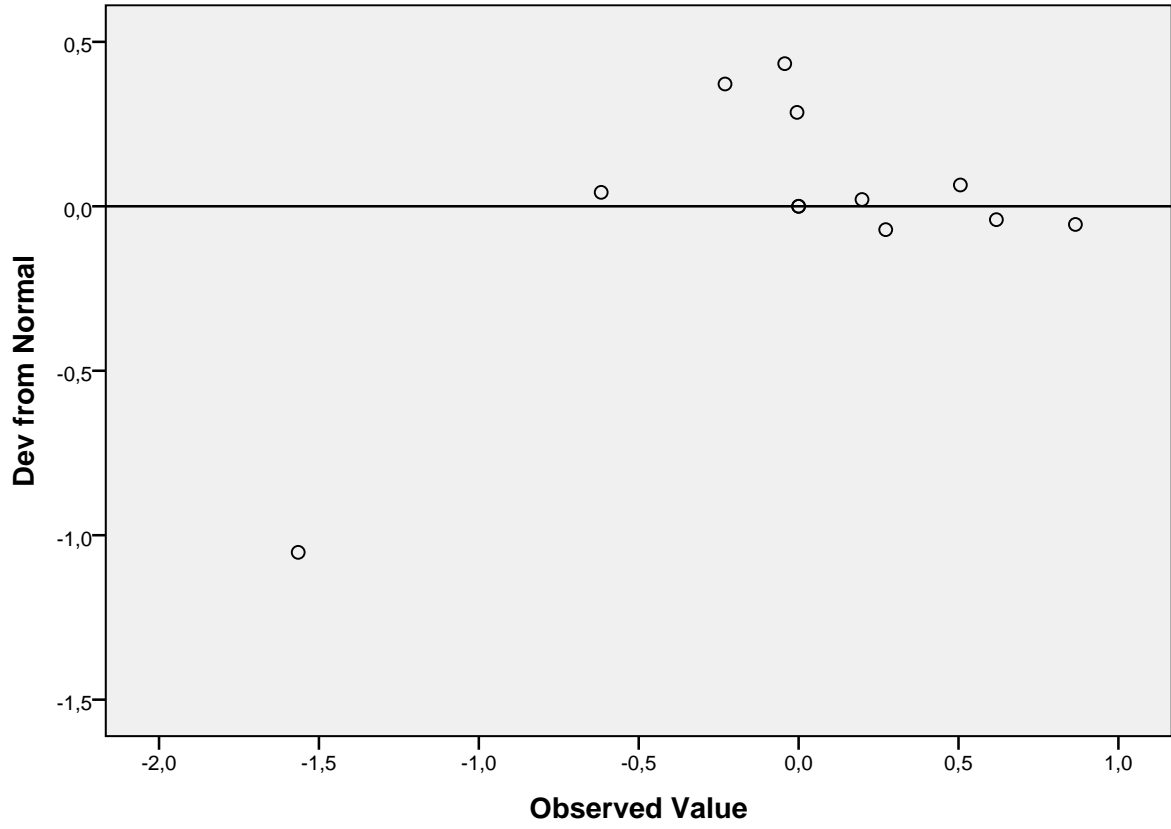

### Detrended Normal Q-Q Plot of Standardized Residual for Sec\_1

Treatment= PLA

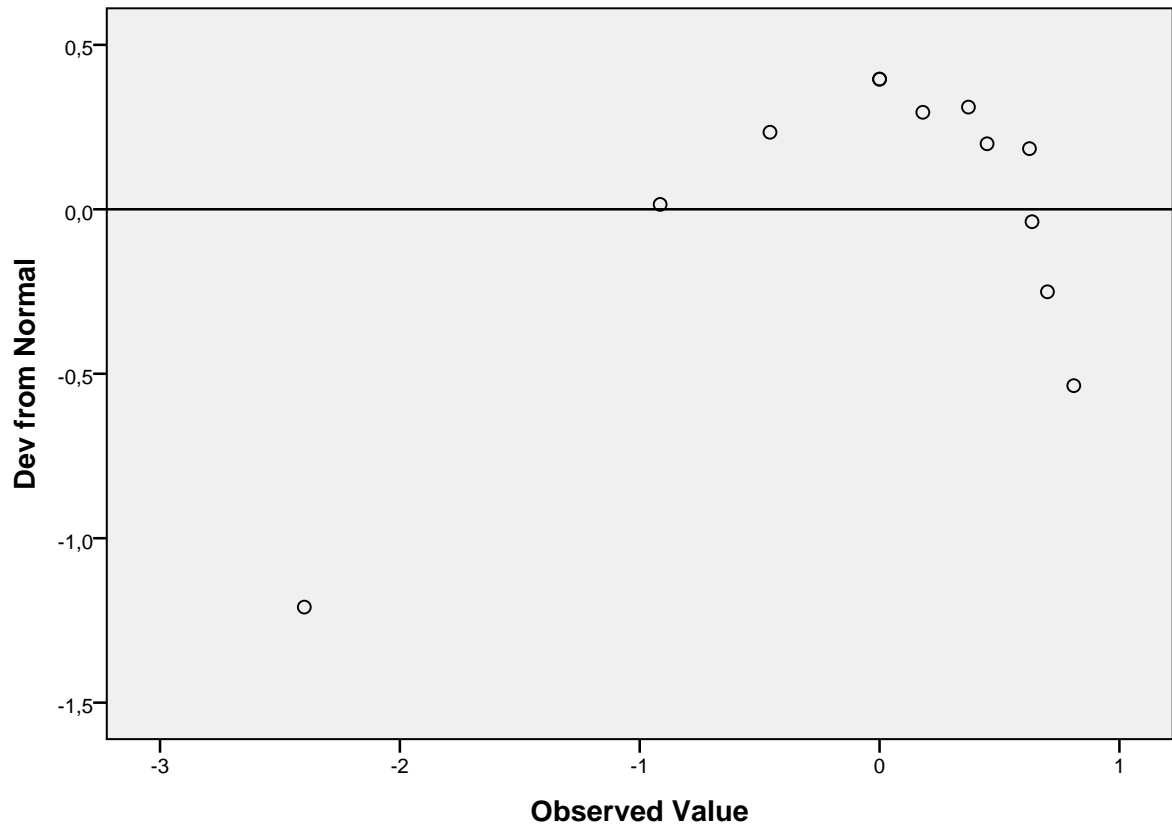



### Detrended Normal Q-Q Plot of Standardized Residual for Sec\_5

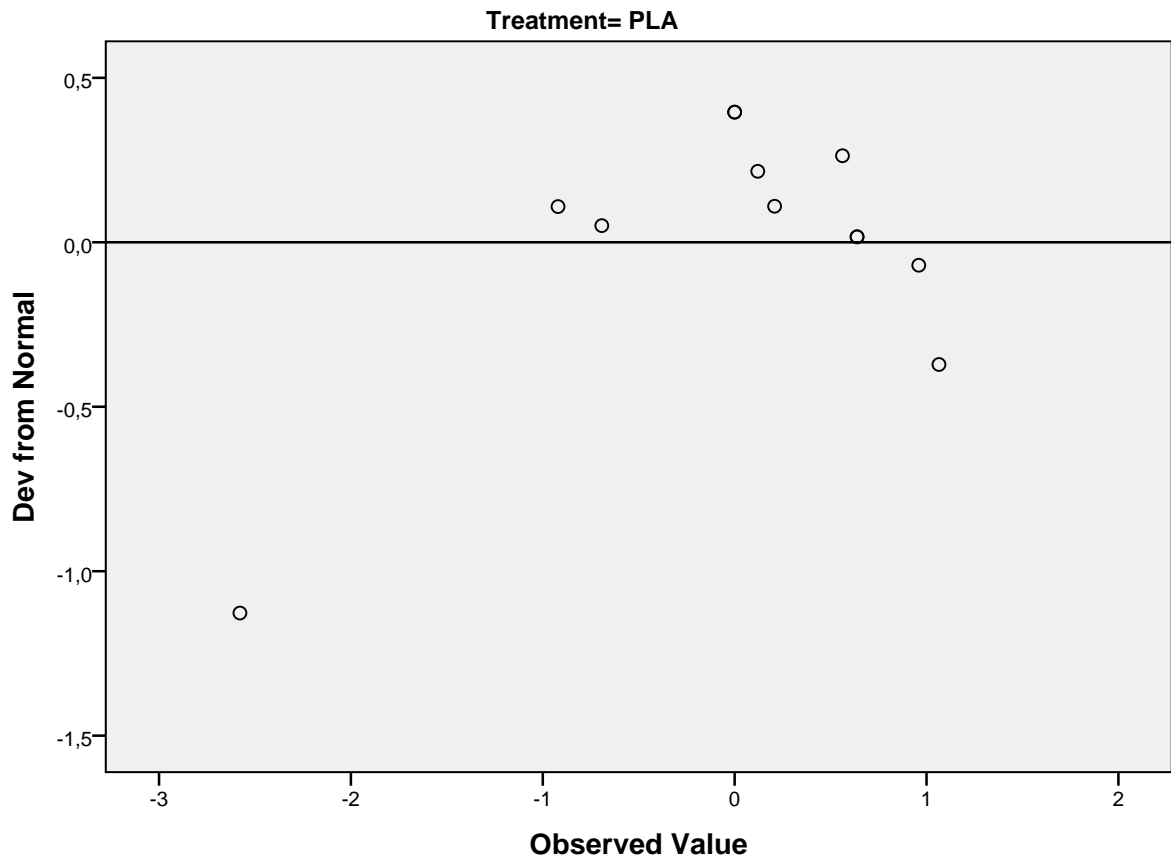

### Detrended Normal Q-Q Plot of Standardized Residual for Sec\_10

Treatment= PLA

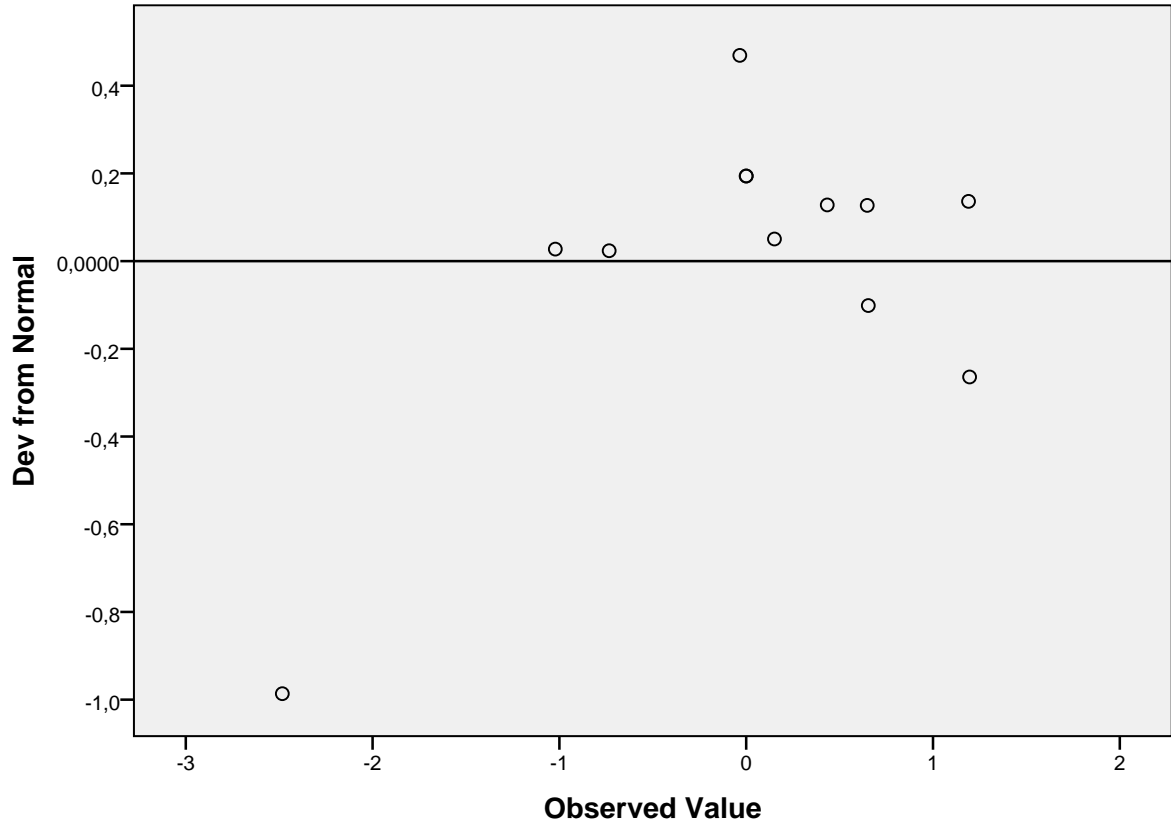

### Detrended Normal Q-Q Plot of Standardized Residual for Sec\_20

Treatment= PLA

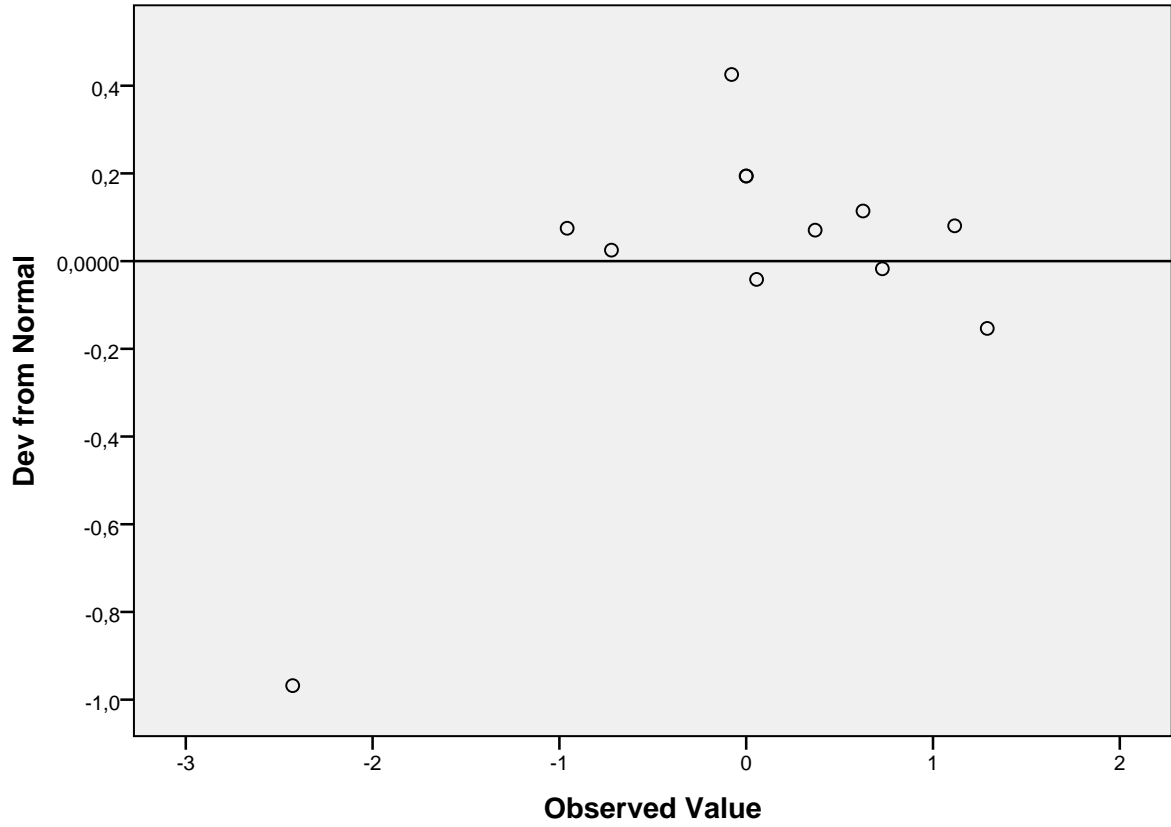

### Detrended Normal Q-Q Plot of Standardized Residual for Sec\_30

Treatment= PLA

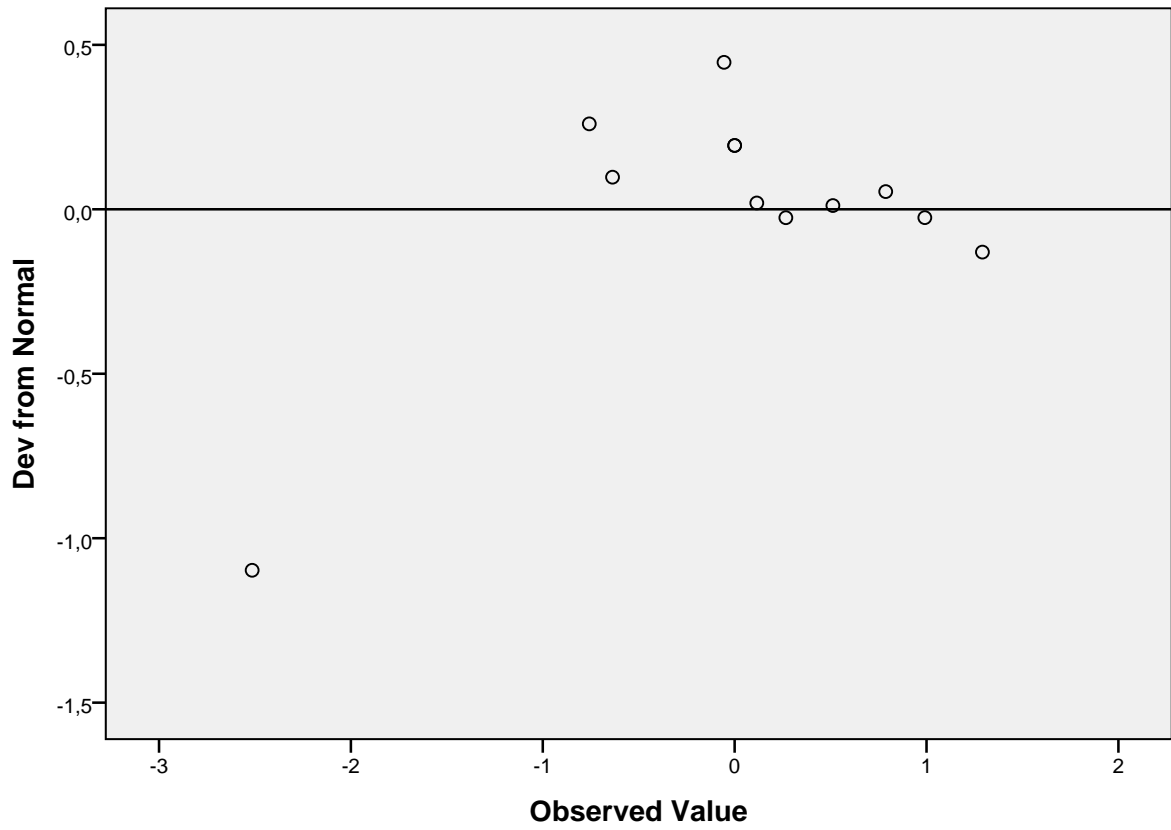

### Detrended Normal Q-Q Plot of Standardized Residual for Sec\_40

Treatment= PLA

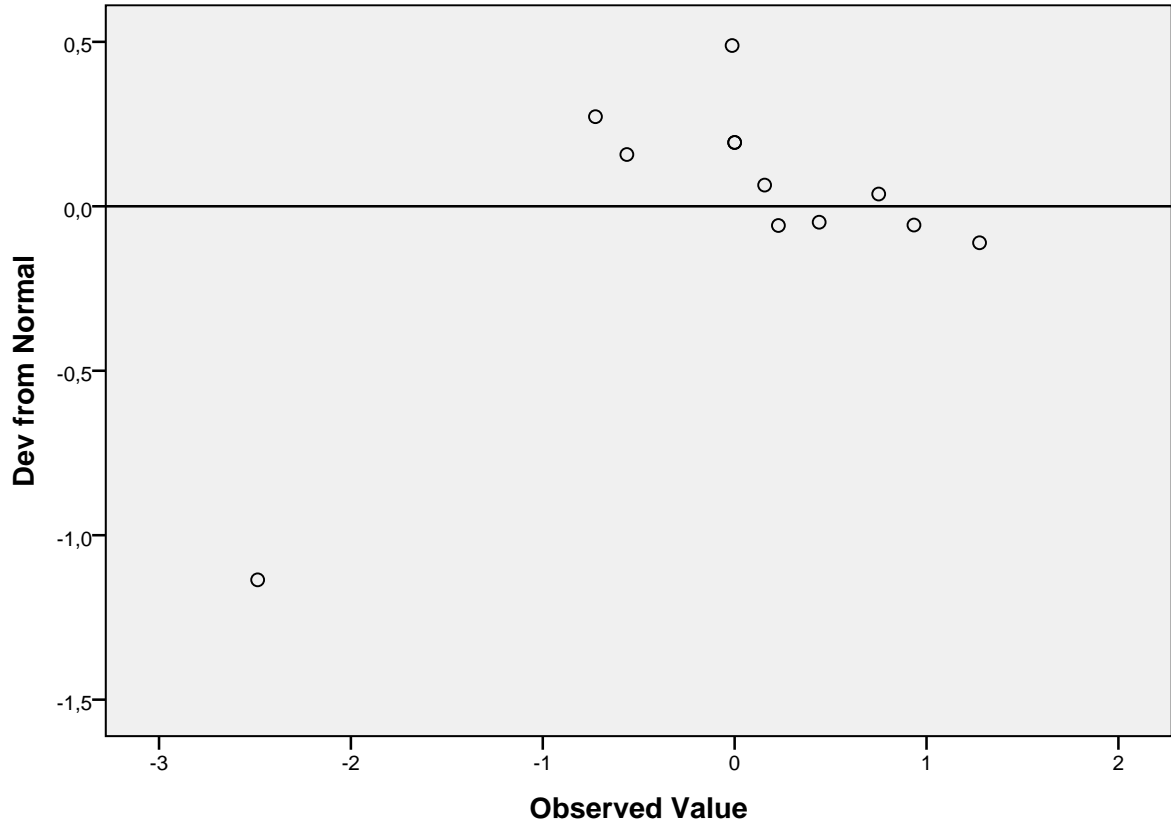

### Detrended Normal Q-Q Plot of Standardized Residual for Sec\_50

Treatment= PLA

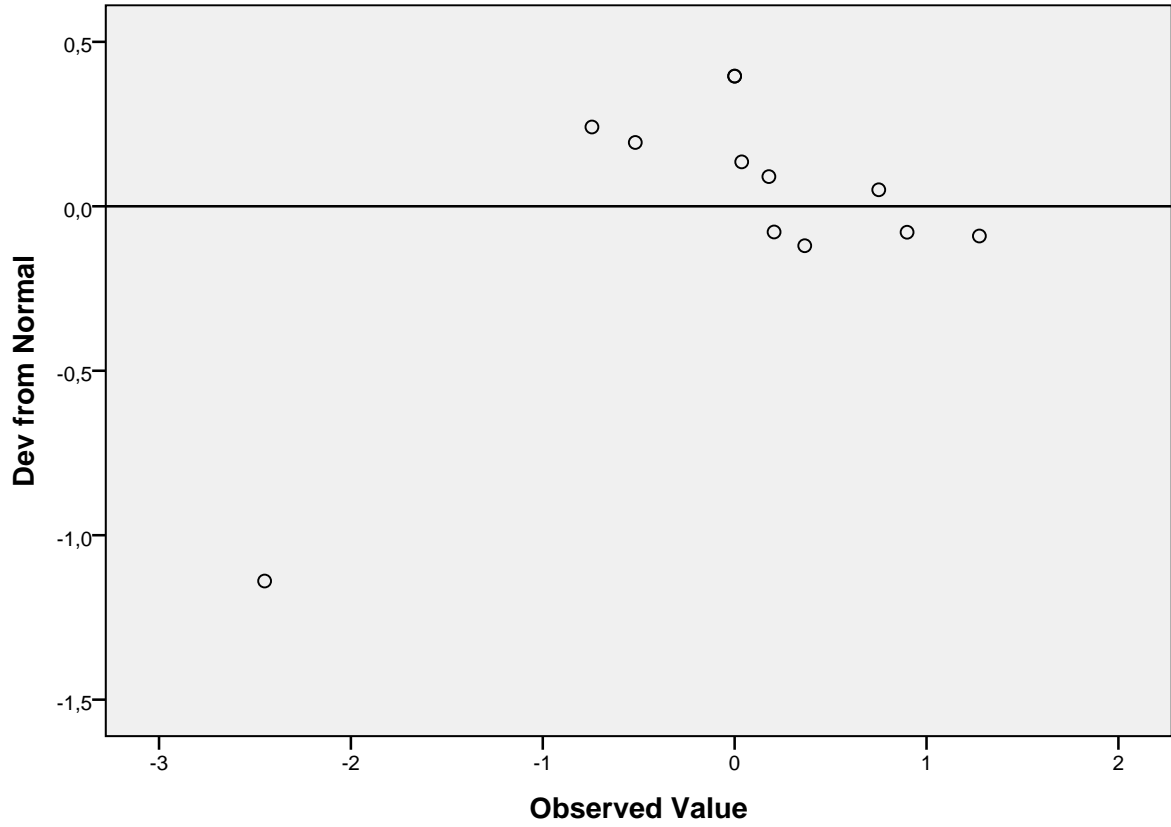

### Detrended Normal Q-Q Plot of Standardized Residual for Sec\_60

Treatment= PLA

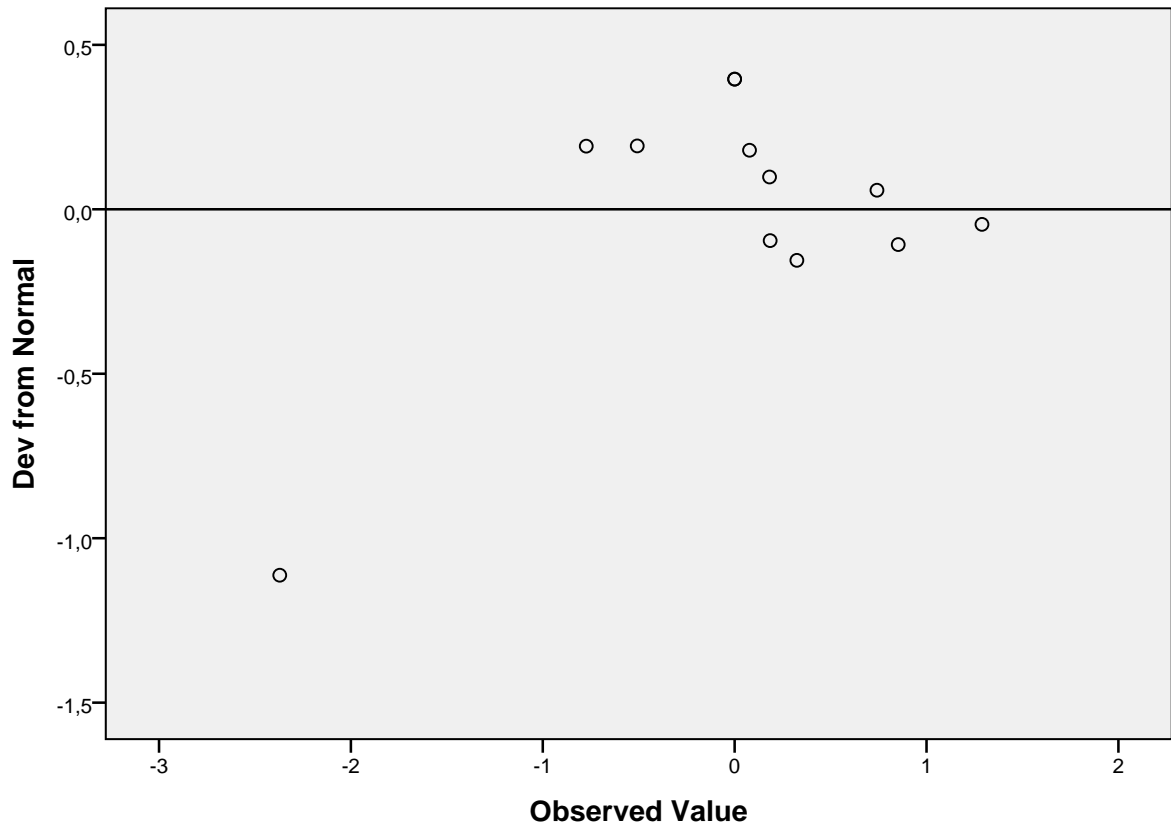

Treatment: PLA

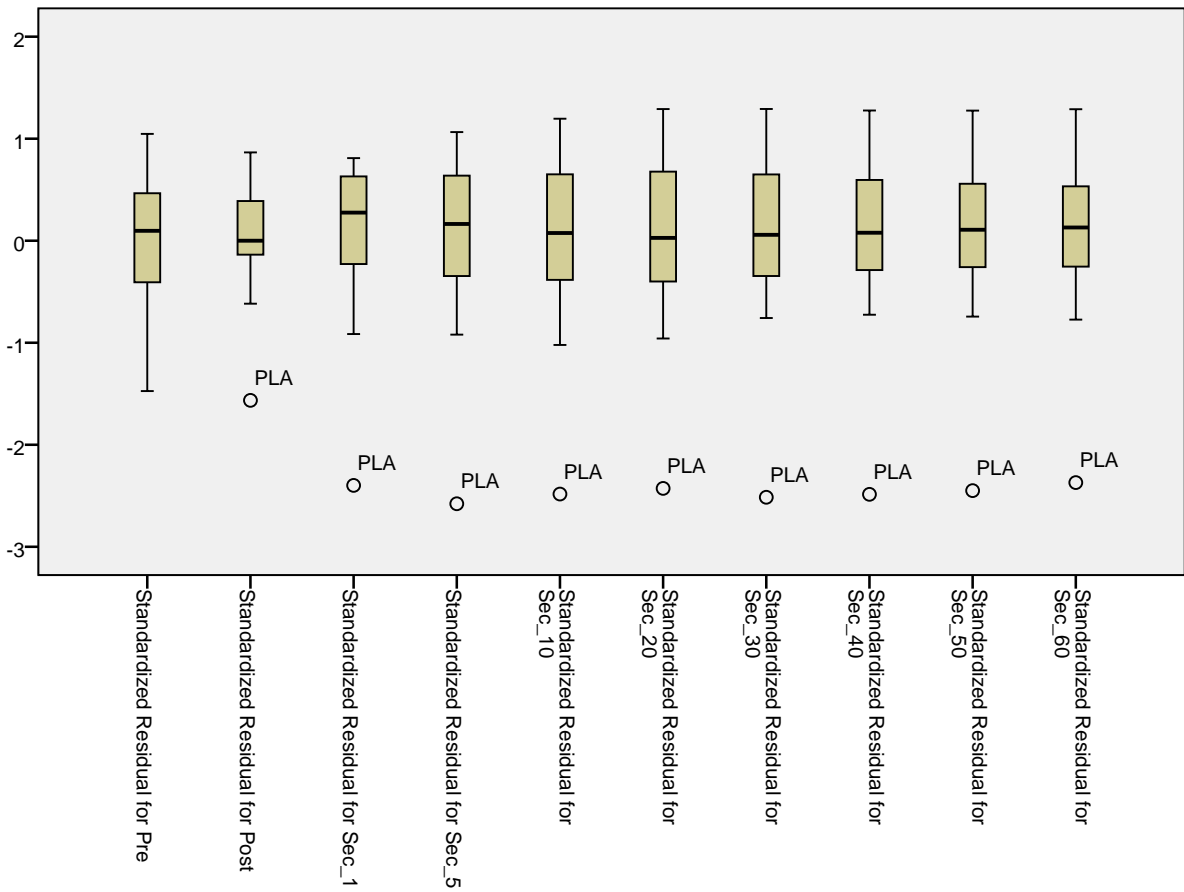



# Normal Q-Q Plots of Standardized Residual for SmO2 During Recovery

## Normal Q-Q Plot of Standardized Residual for Pre

Treatment= BG

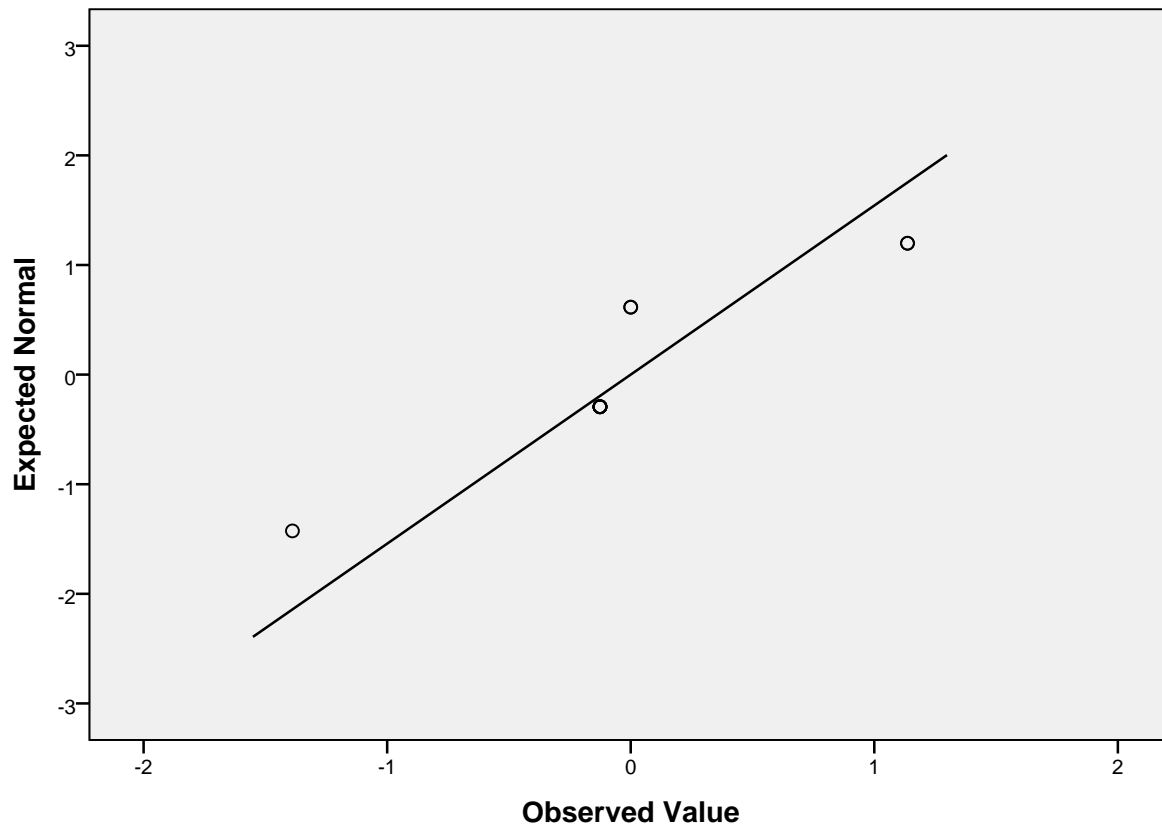

### Normal Q-Q Plot of Standardized Residual for Sec\_1

Treatment= BG

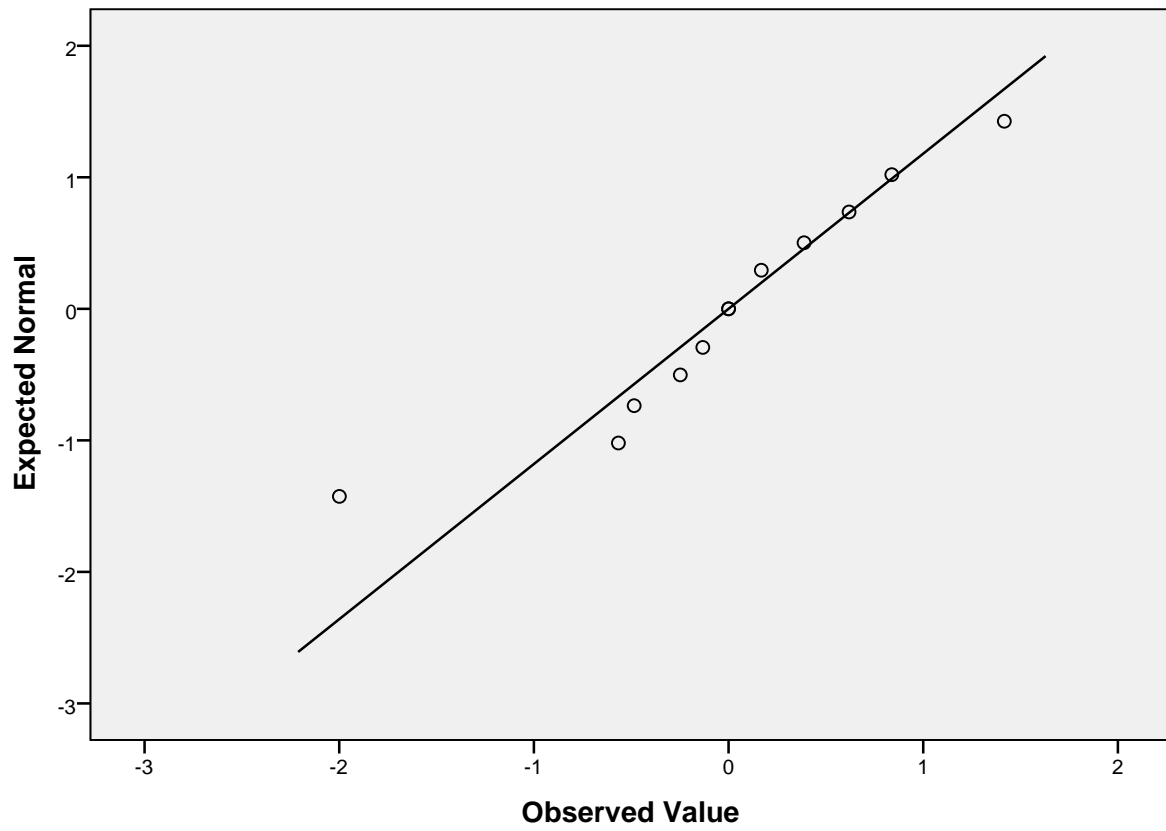

### Normal Q-Q Plot of Standardized Residual for Sec\_5

Treatment= BG

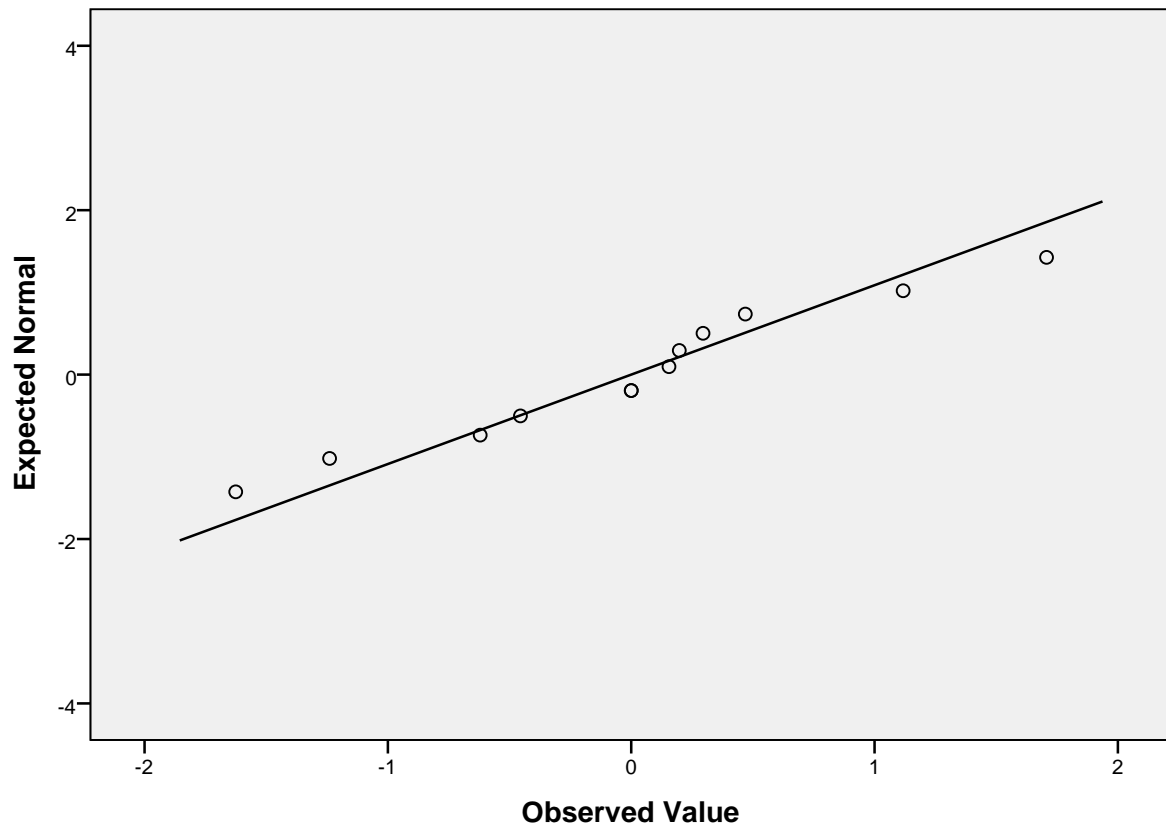

### Normal Q-Q Plot of Standardized Residual for Sec\_10

Treatment= BG

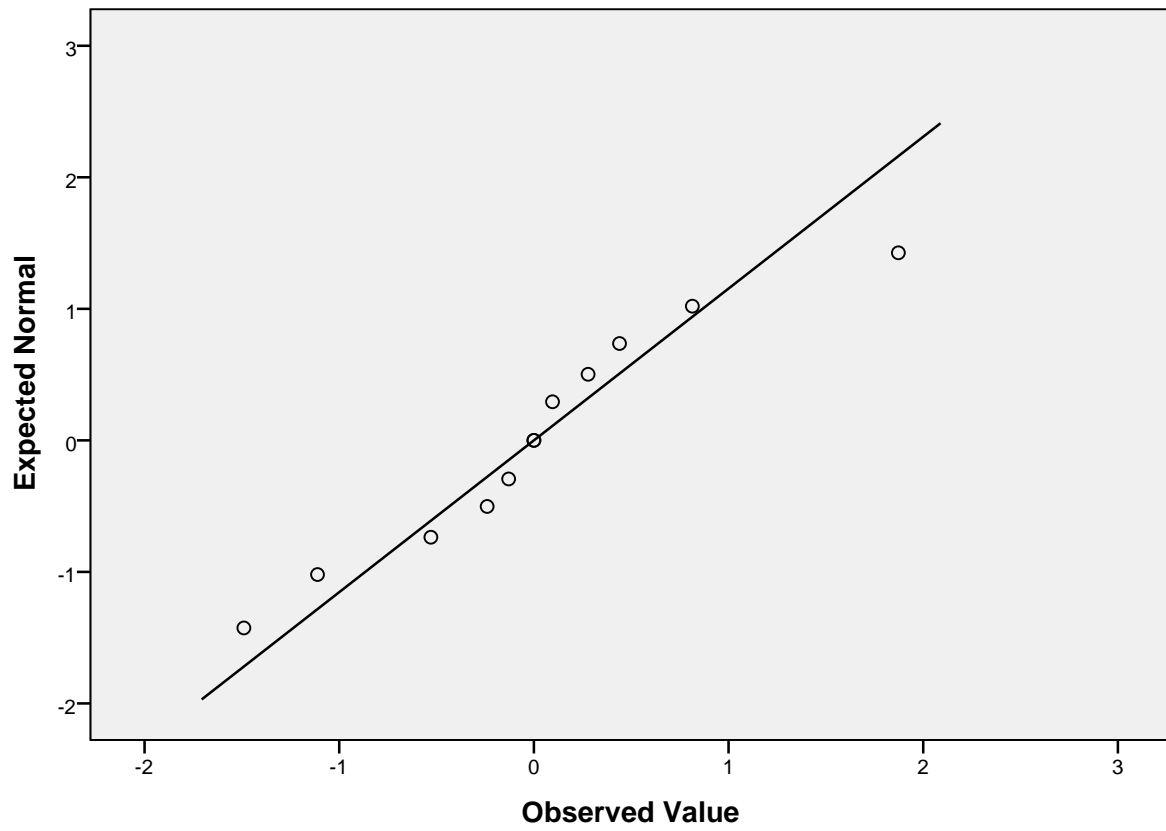

### Normal Q-Q Plot of Standardized Residual for Sec\_20

Treatment= BG

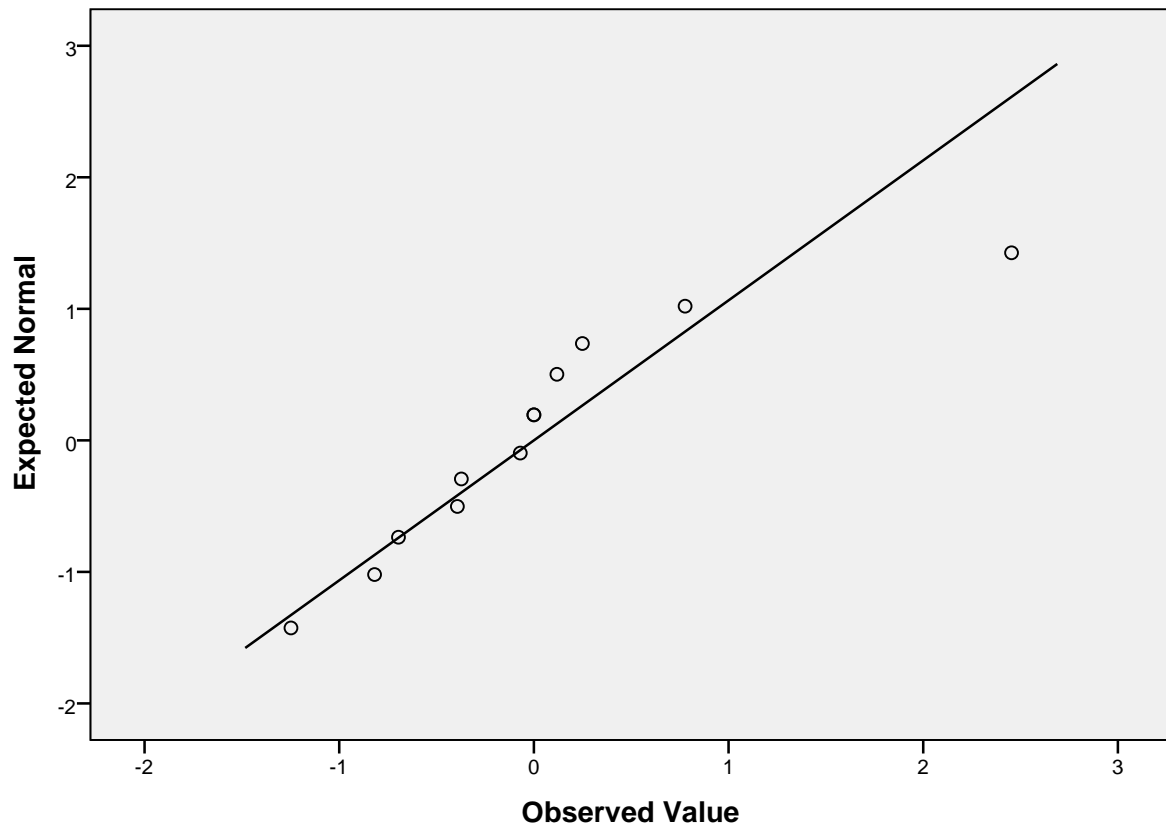

### Normal Q-Q Plot of Standardized Residual for Sec\_30

Treatment= BG

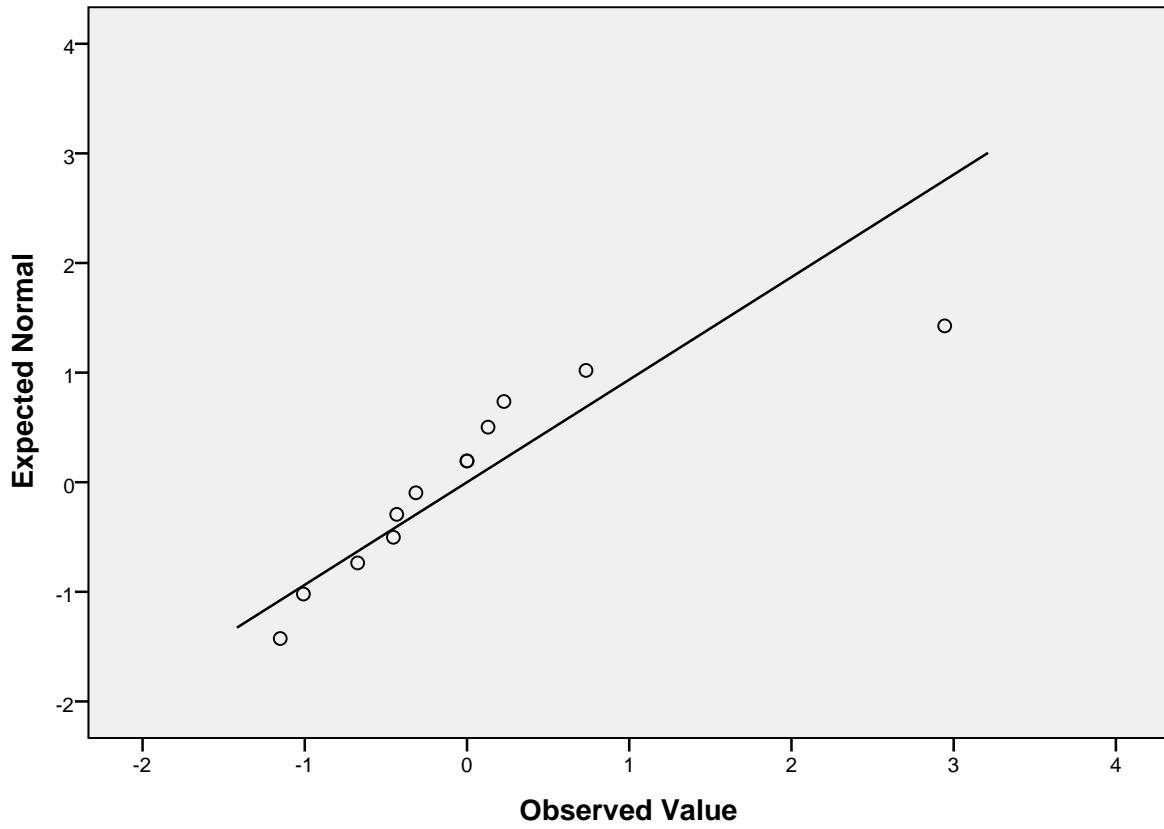

### Normal Q-Q Plot of Standardized Residual for Sec\_40

Treatment= BG

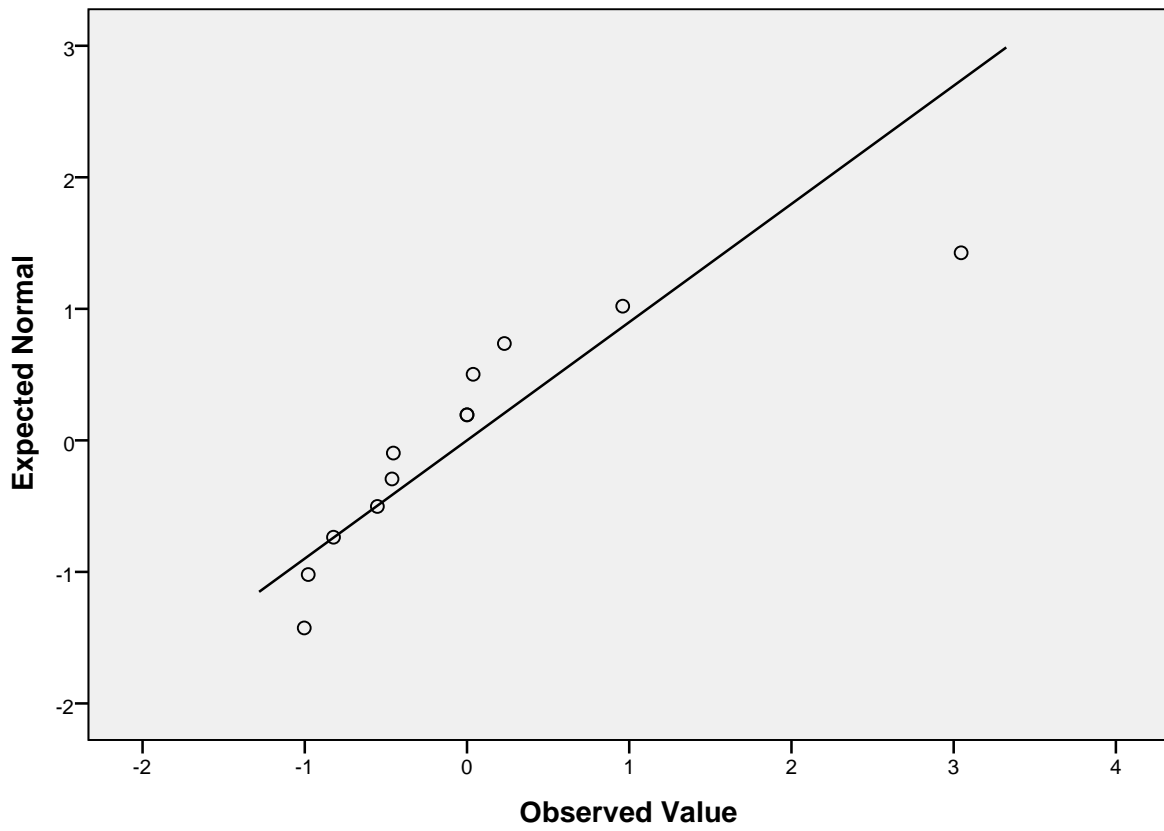

### Normal Q-Q Plot of Standardized Residual for Sec\_50

Treatment= BG

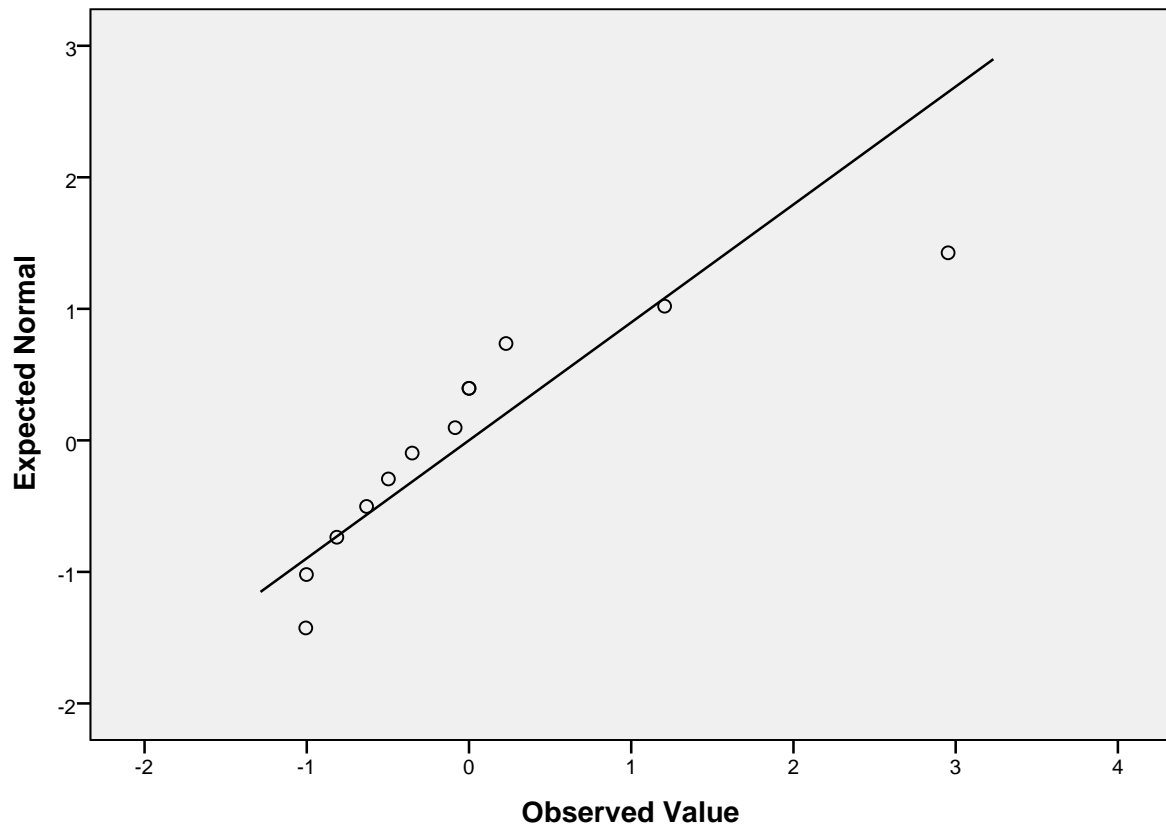



### Normal Q-Q Plot of Standardized Residual for Sec\_60

Treatment= BG

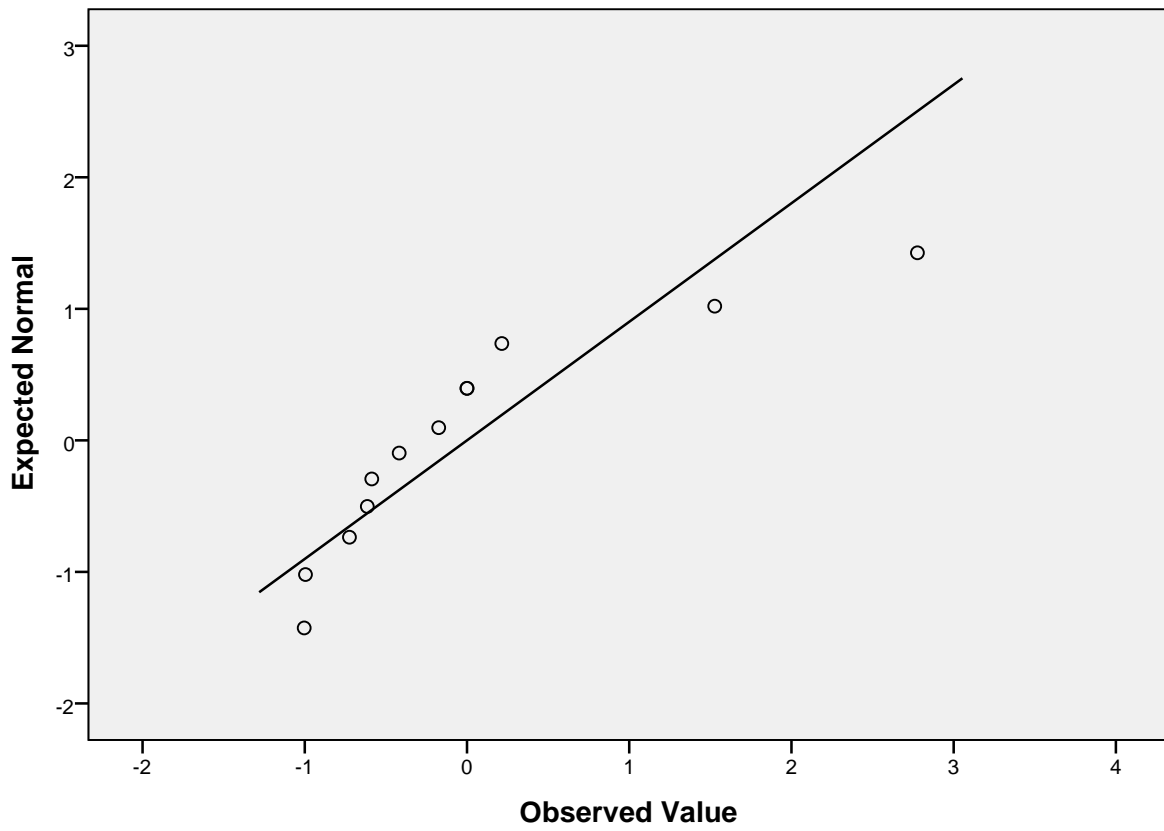

### Detrended Normal Q-Q Plots of Standardized residual for tHb During Exercise

### Detrended Normal Q-Q Plot of Standardized Residual for Pre

Treatment= BG

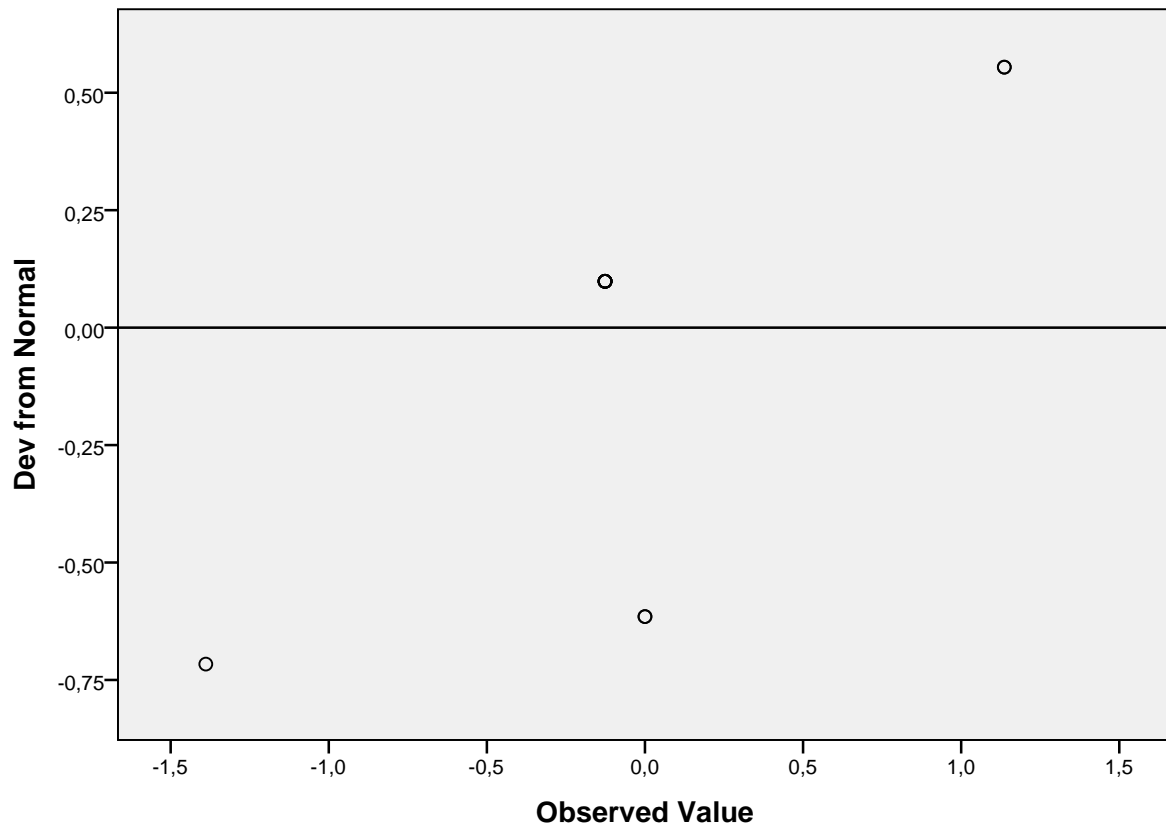

### Detrended Normal Q-Q Plot of Standardized Residual for Sec\_1

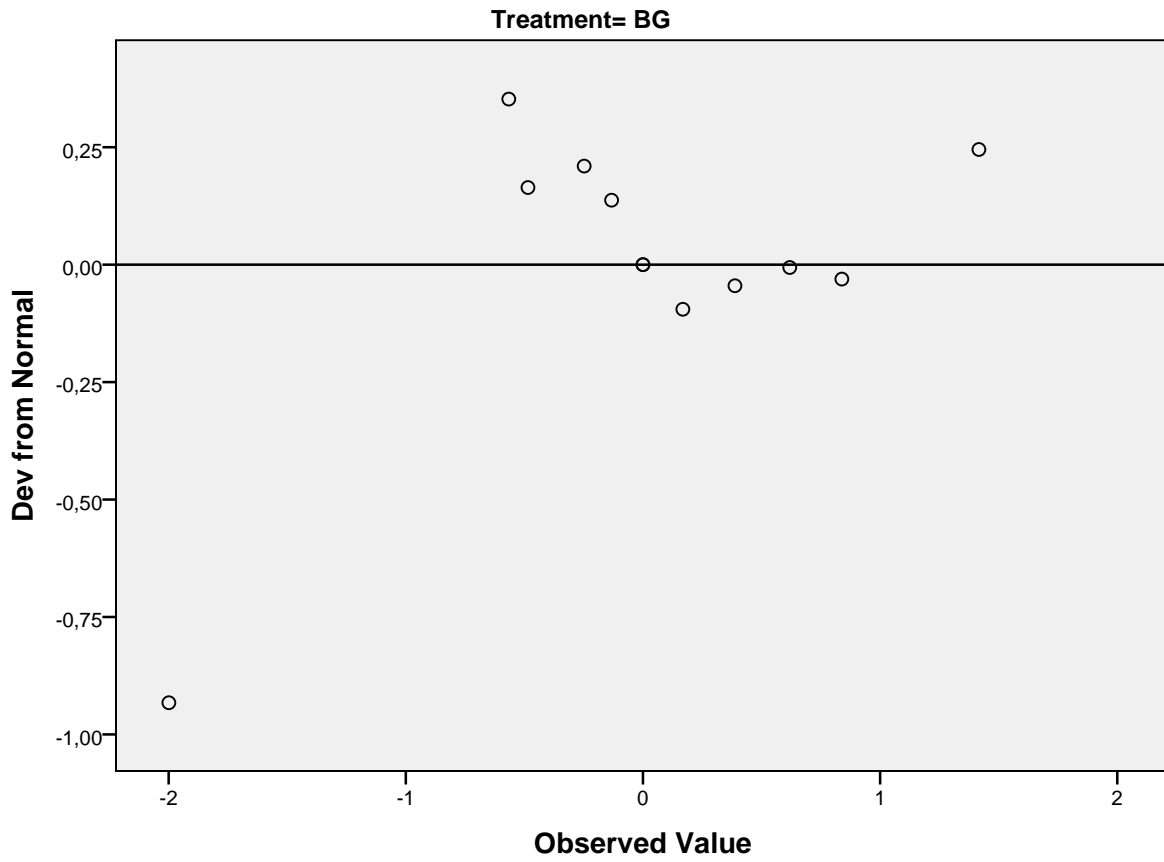

### Detrended Normal Q-Q Plot of Standardized Residual for Sec\_5

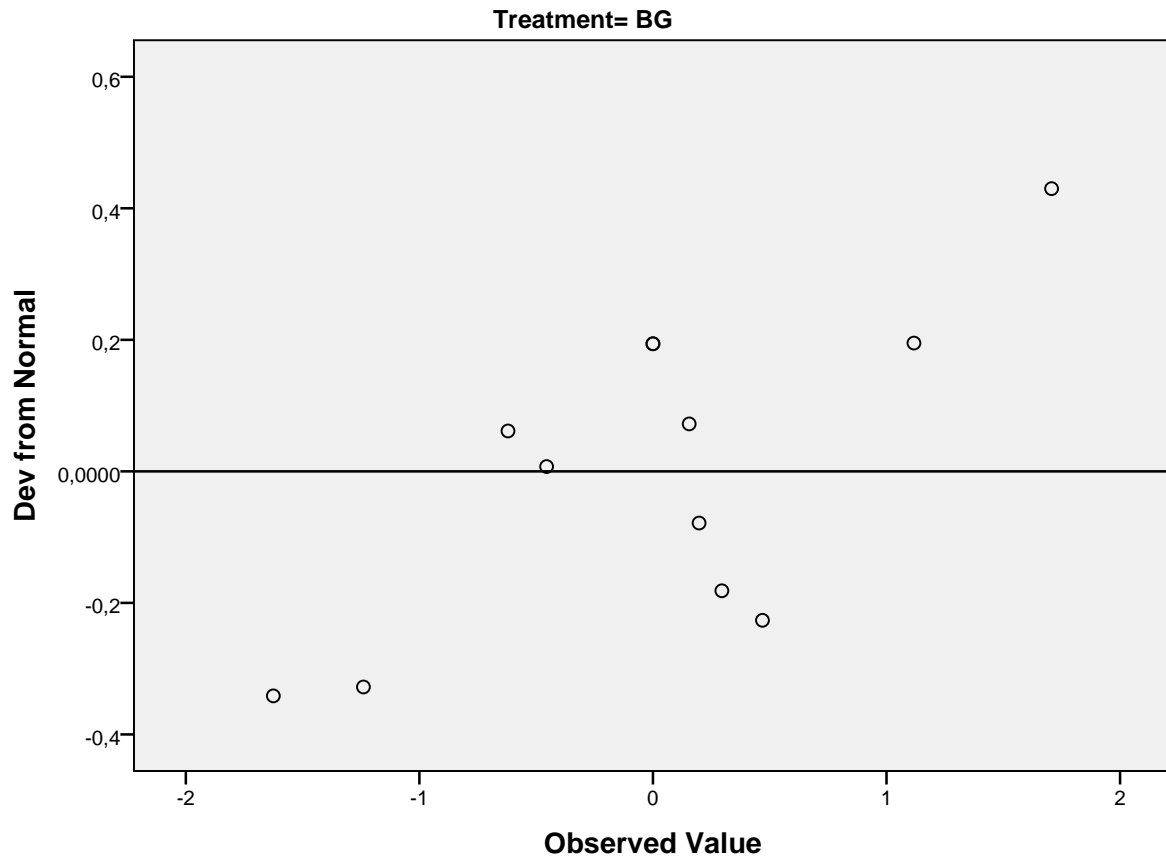

### Detrended Normal Q-Q Plot of Standardized Residual for Sec\_10

Treatment= BG

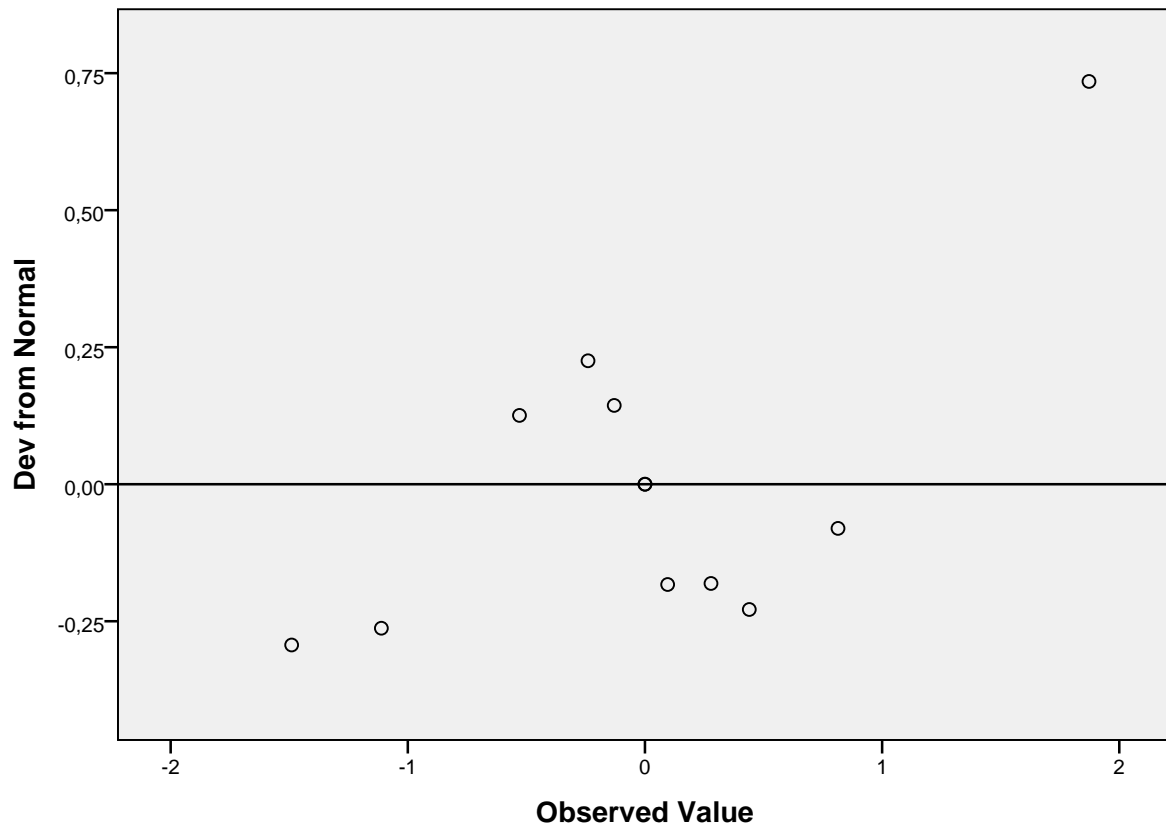

### Detrended Normal Q-Q Plot of Standardized Residual for Sec\_20

Treatment= BG

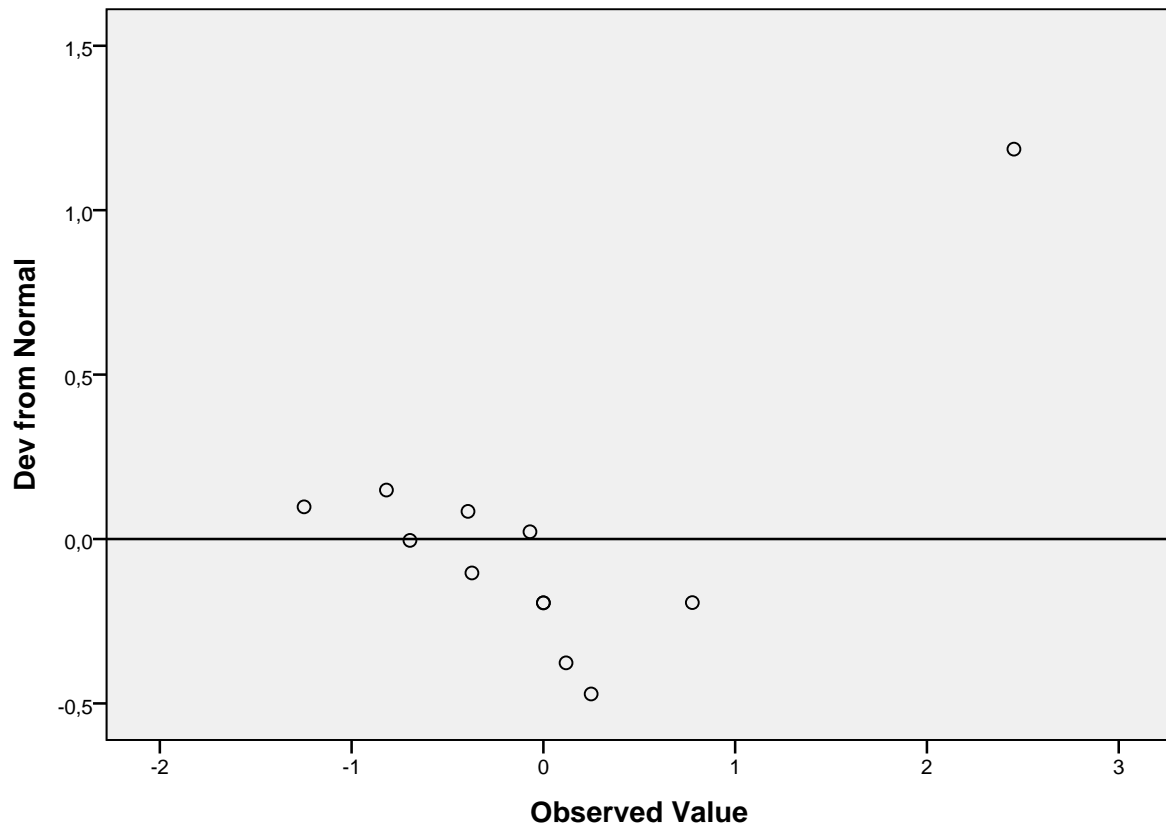

### Detrended Normal Q-Q Plot of Standardized Residual for Sec\_30

Treatment= BG

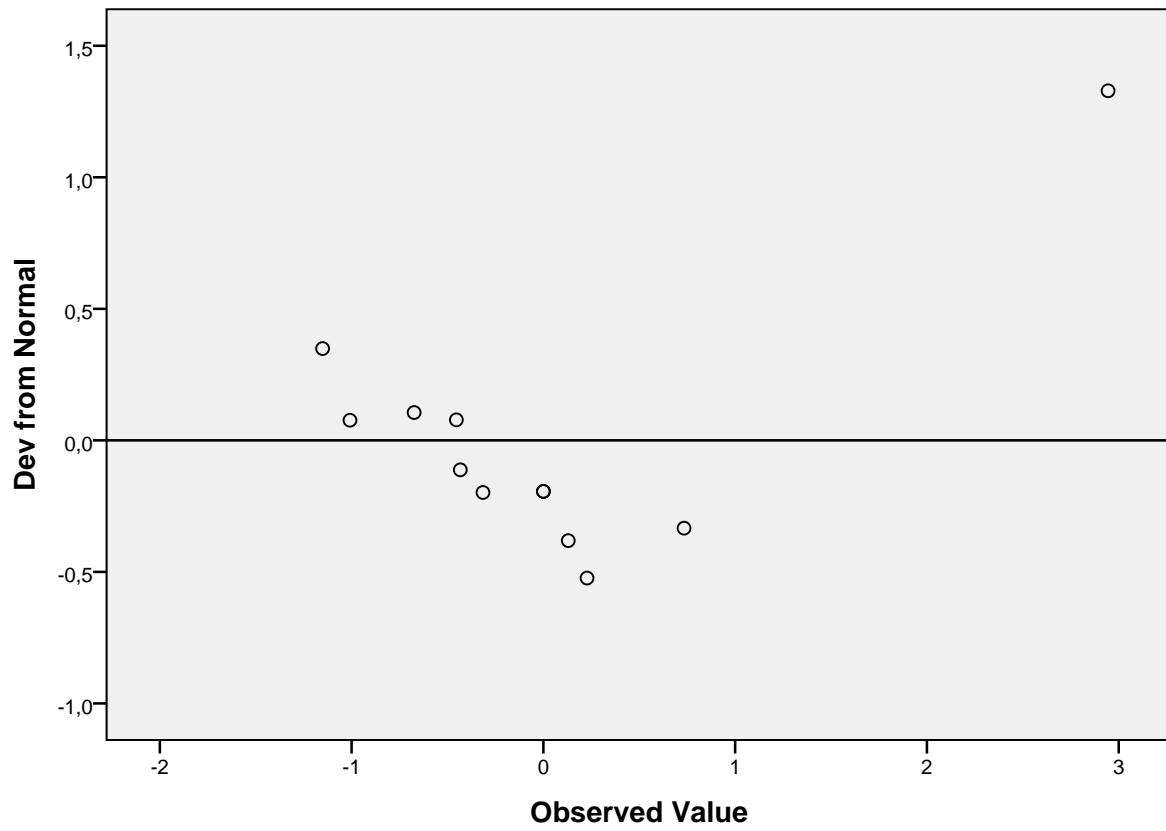

### Detrended Normal Q-Q Plot of Standardized Residual for Sec\_40

Treatment= BG

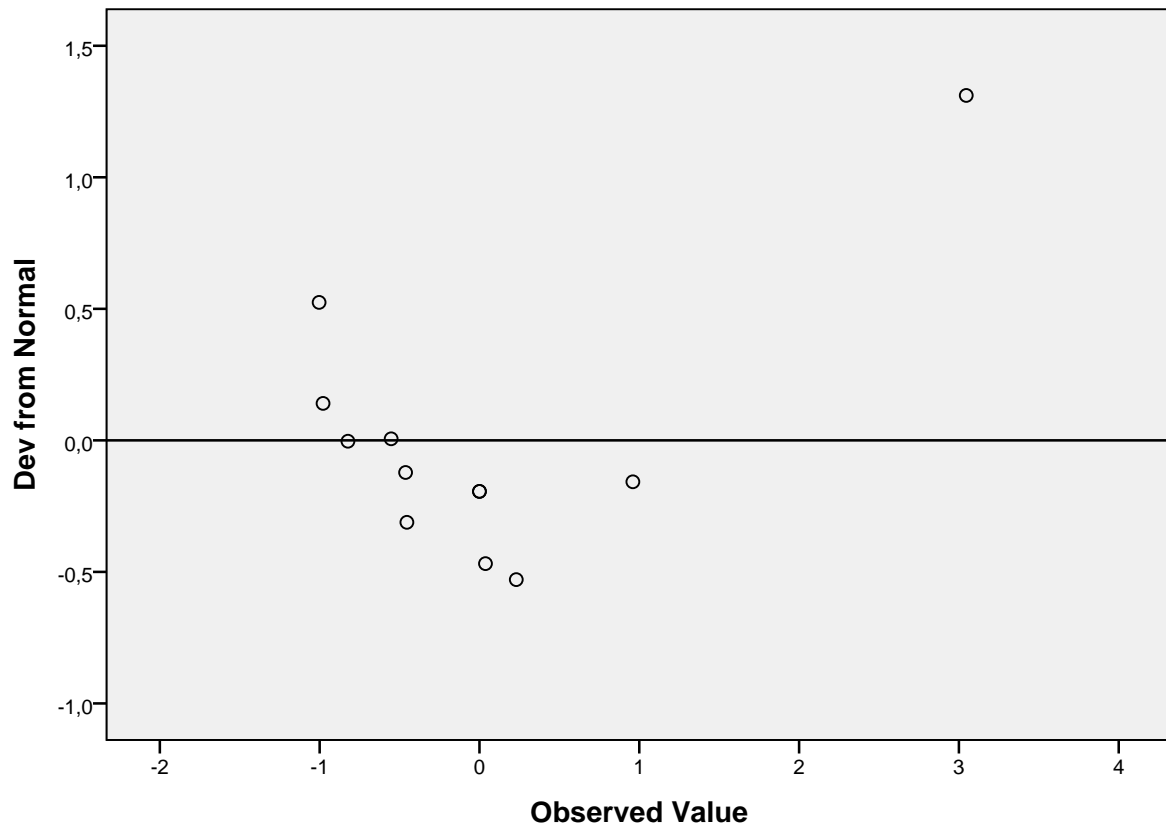



### Detrended Normal Q-Q Plot of Standardized Residual for Sec\_50

Treatment= BG

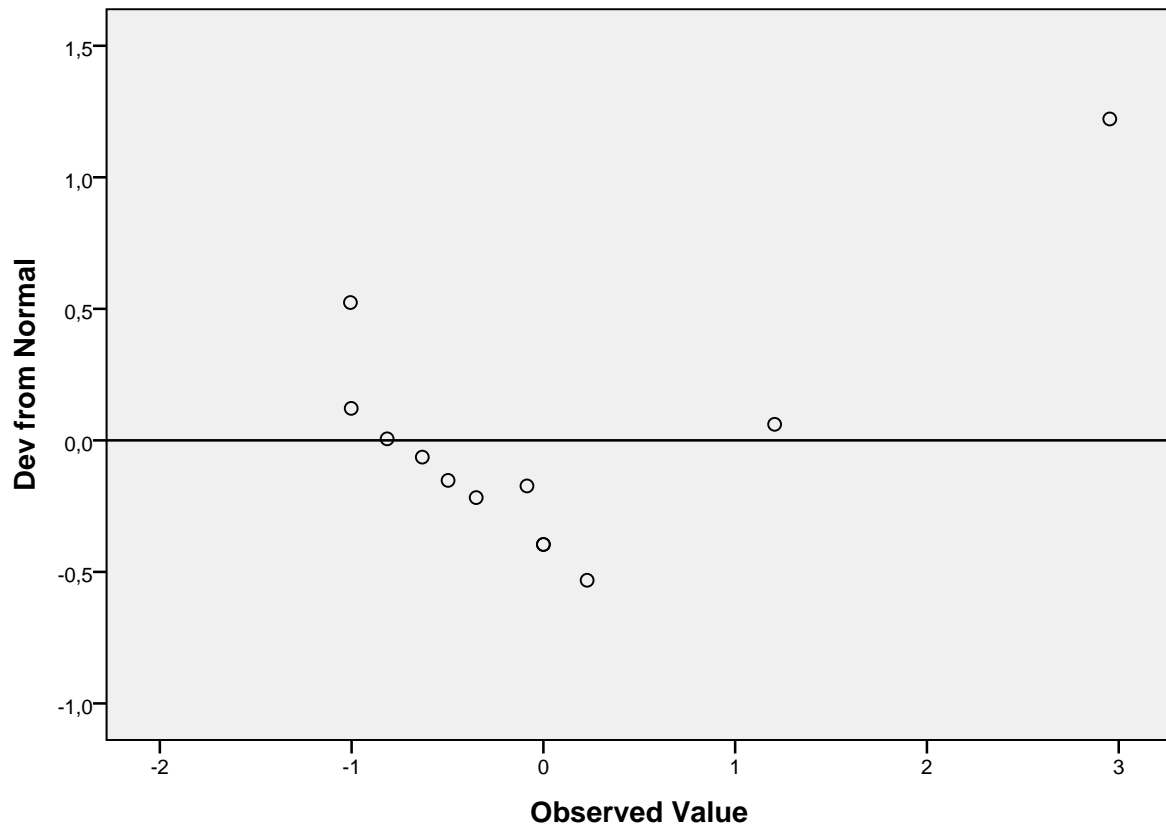

### Detrended Normal Q-Q Plot of Standardized Residual for Sec\_60

Treatment= BG

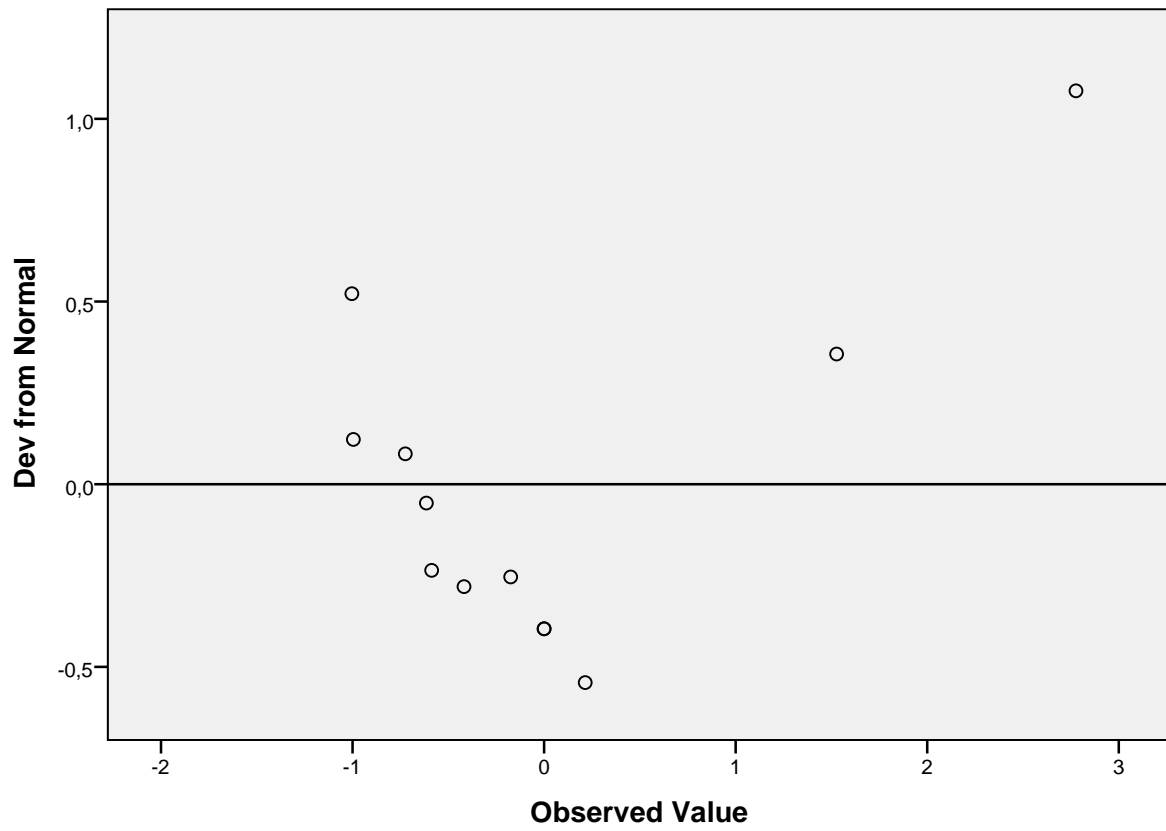

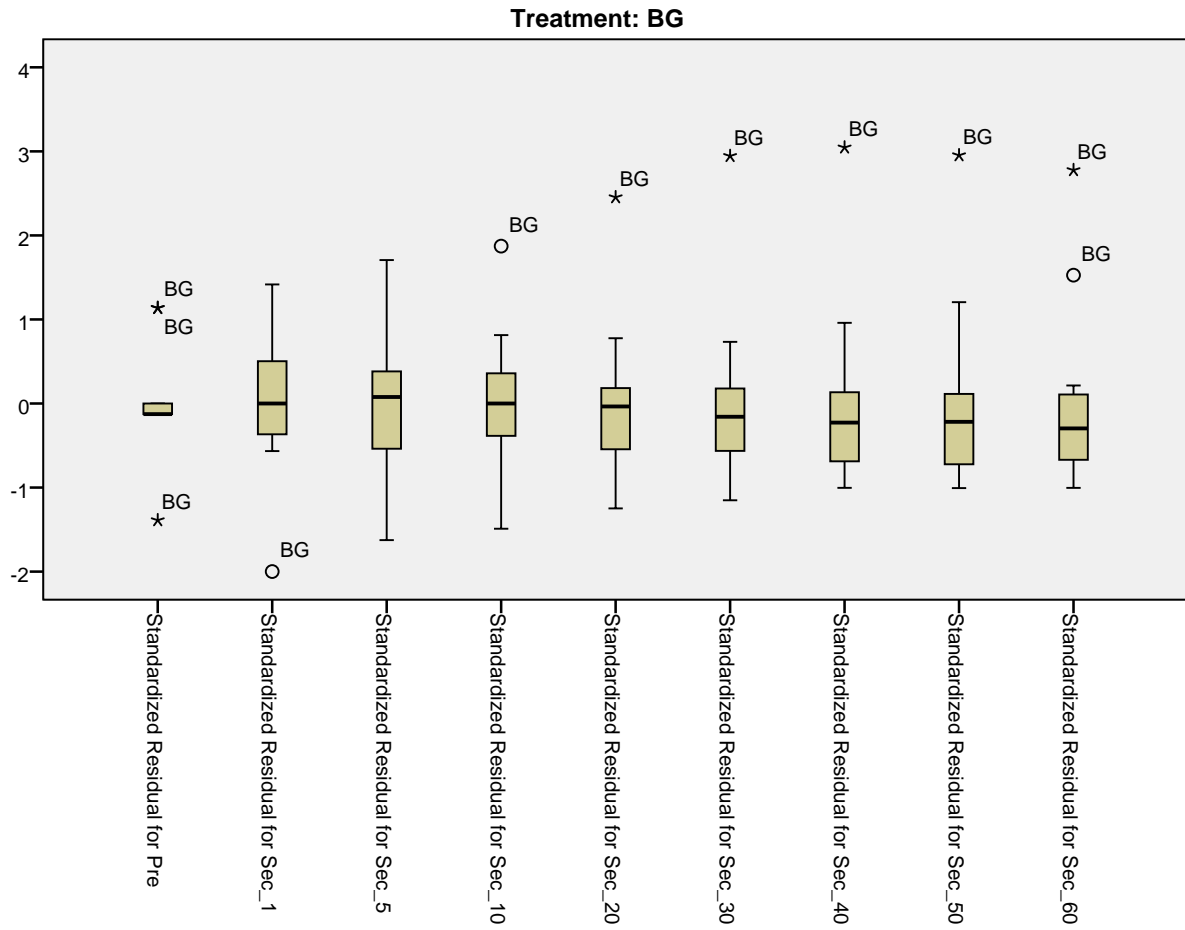

**Normal Q-Q Plots of Standardized residual for tHb During Exercise**

# Normal Q-Q Plots of Standardized Residual for SmO2 During Recovery

## Normal Q-Q Plot of Standardized Residual for Pre

Treatment= PLA

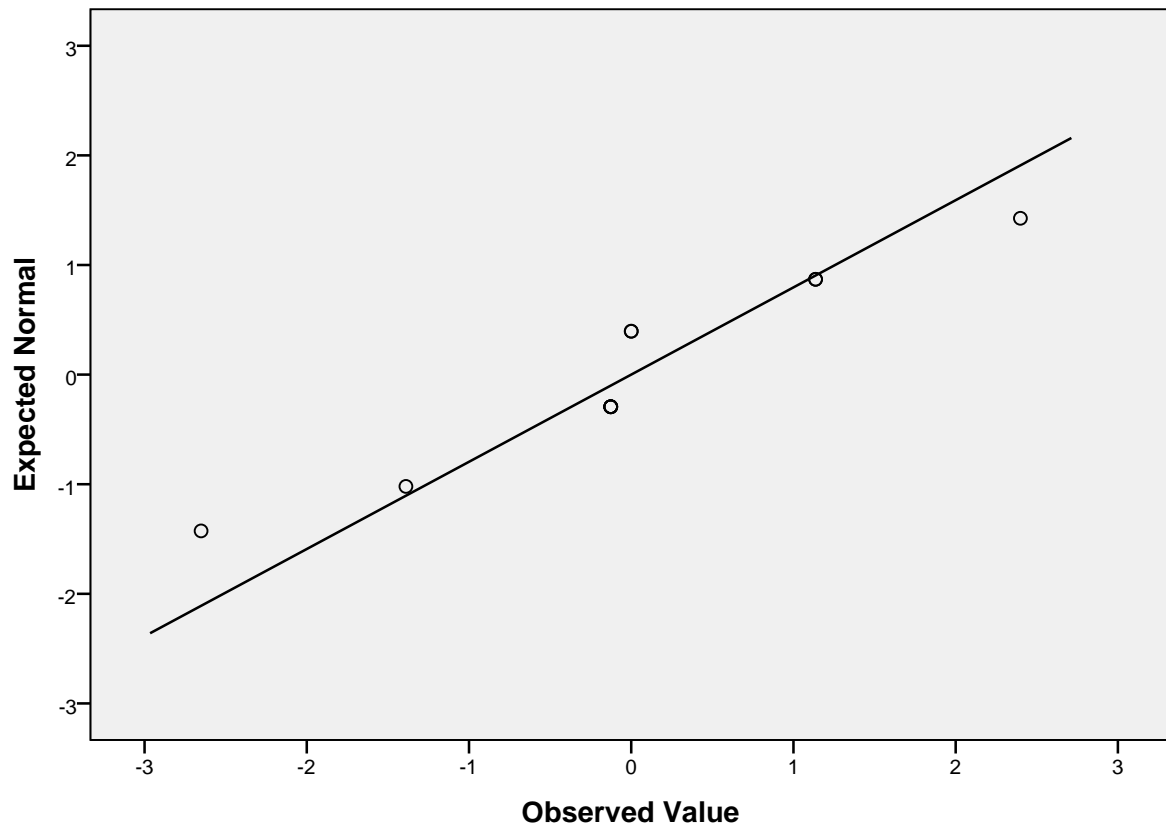

### Normal Q-Q Plot of Standardized Residual for Sec\_1

Treatment= PLA

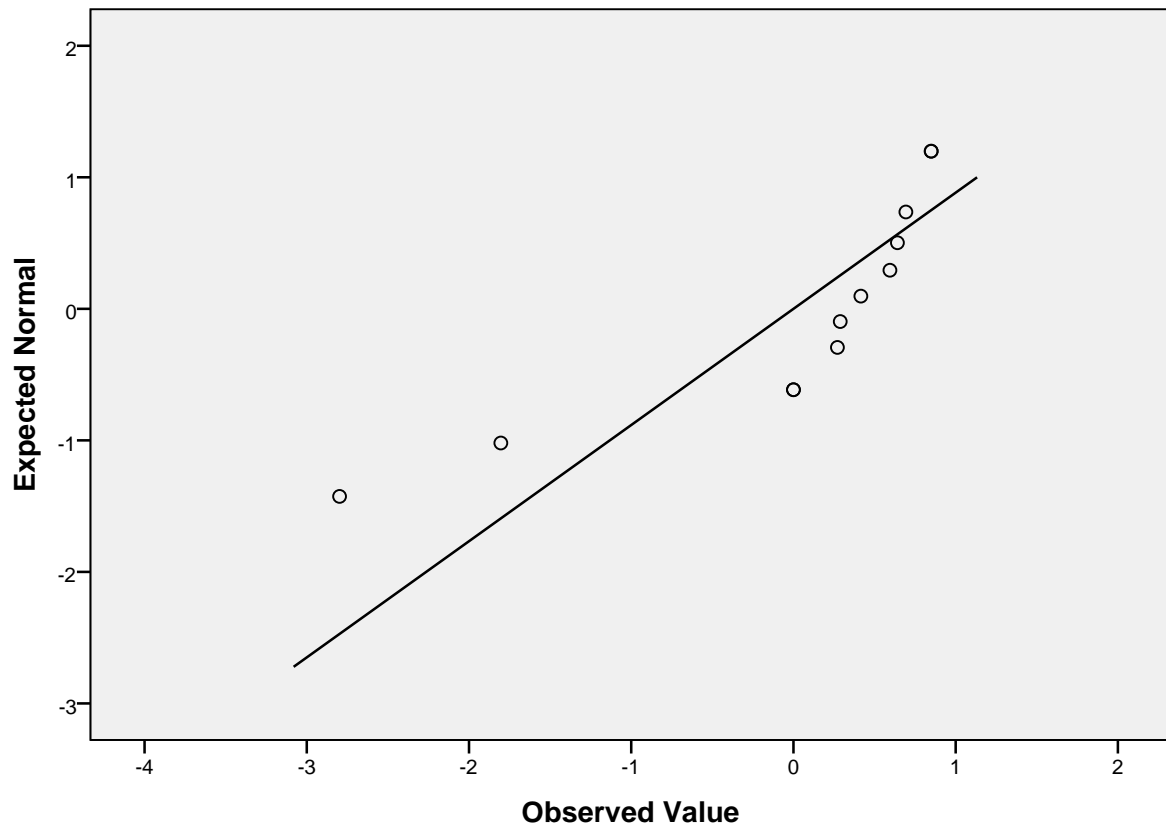

### Normal Q-Q Plot of Standardized Residual for Sec\_5

Treatment= PLA

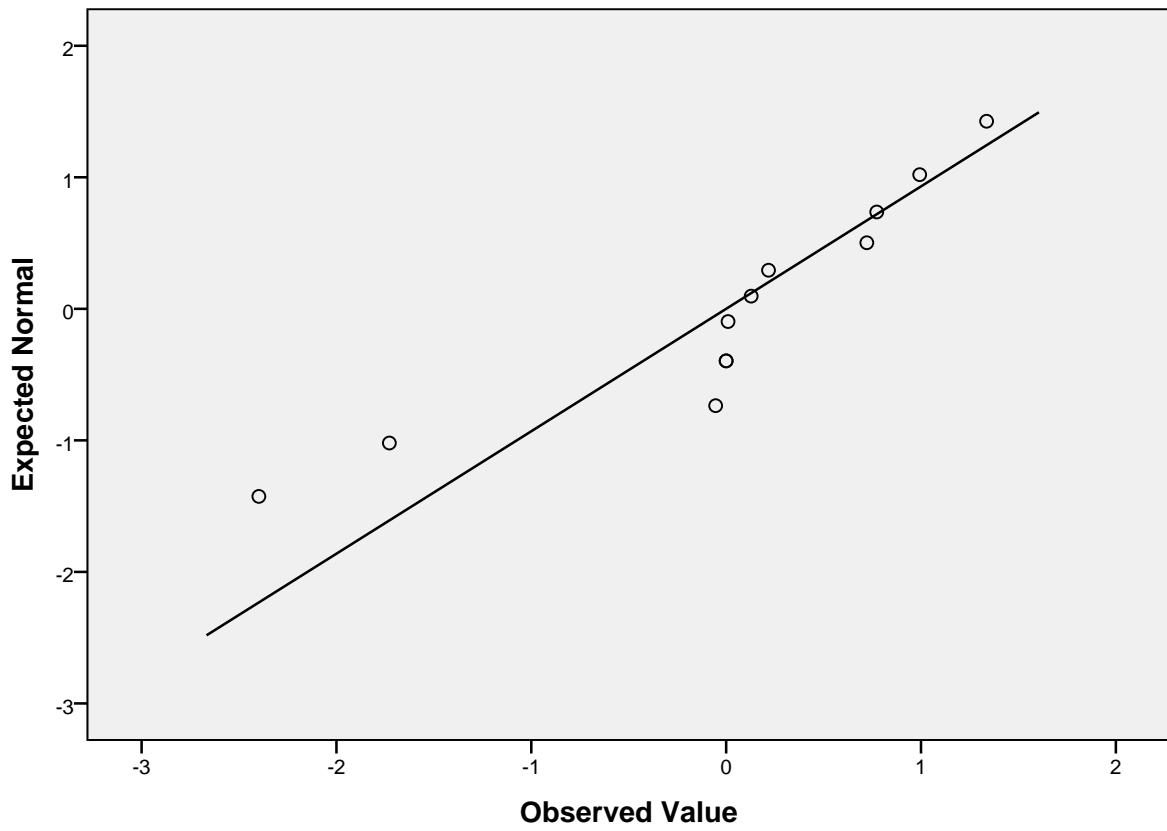

### Normal Q-Q Plot of Standardized Residual for Sec\_10

Treatment= PLA

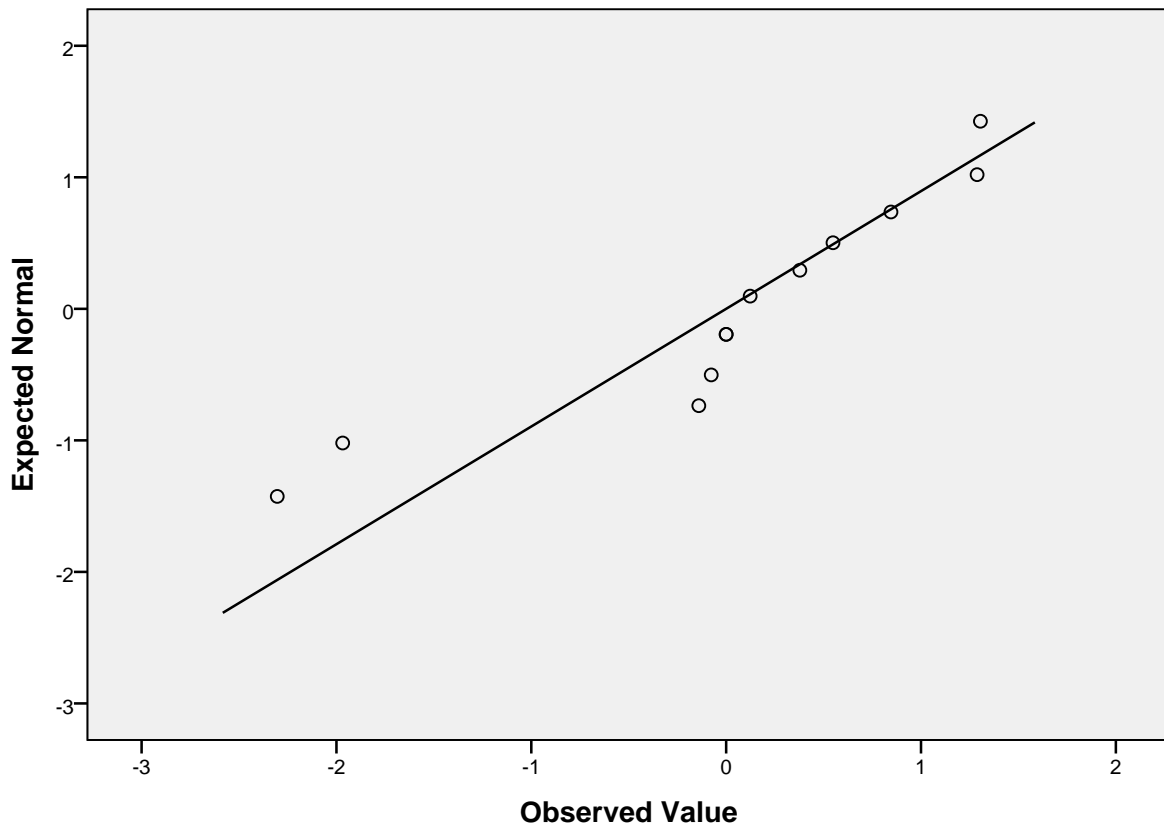

### Normal Q-Q Plot of Standardized Residual for Sec\_20

Treatment= PLA

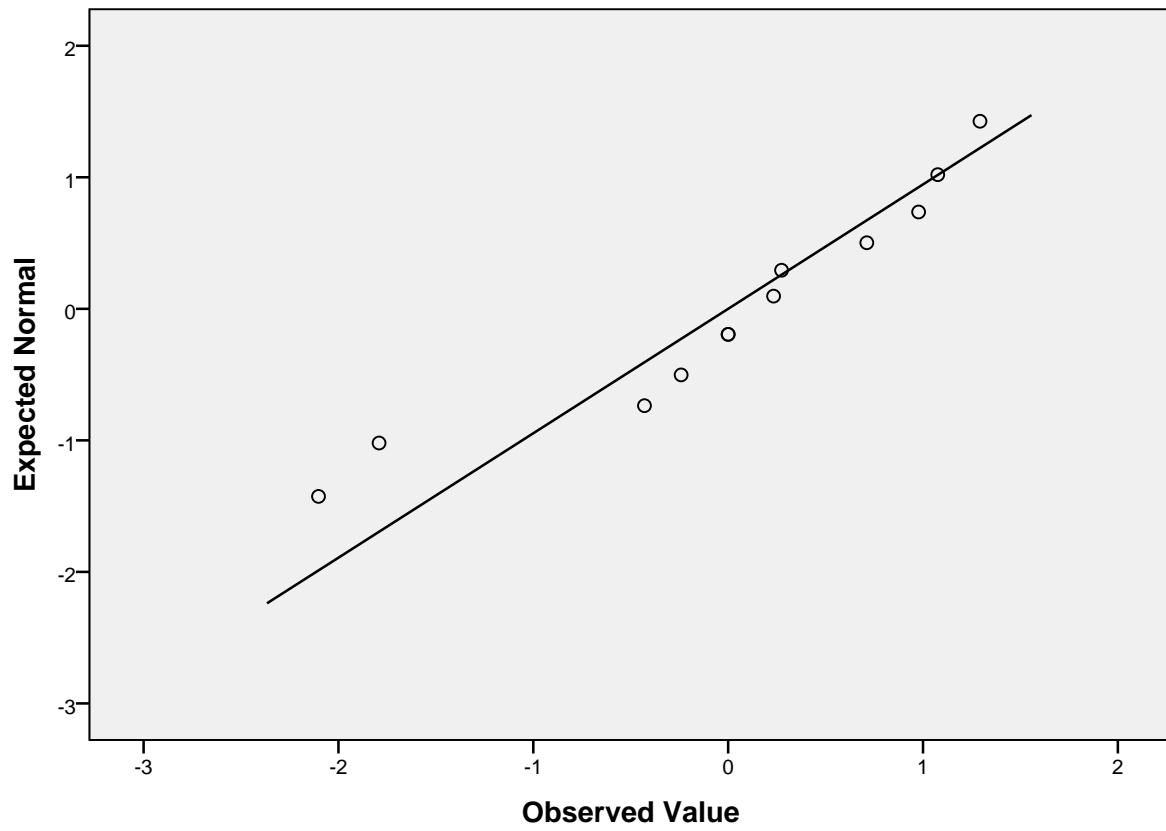



### Normal Q-Q Plot of Standardized Residual for Sec\_30

Treatment= PLA

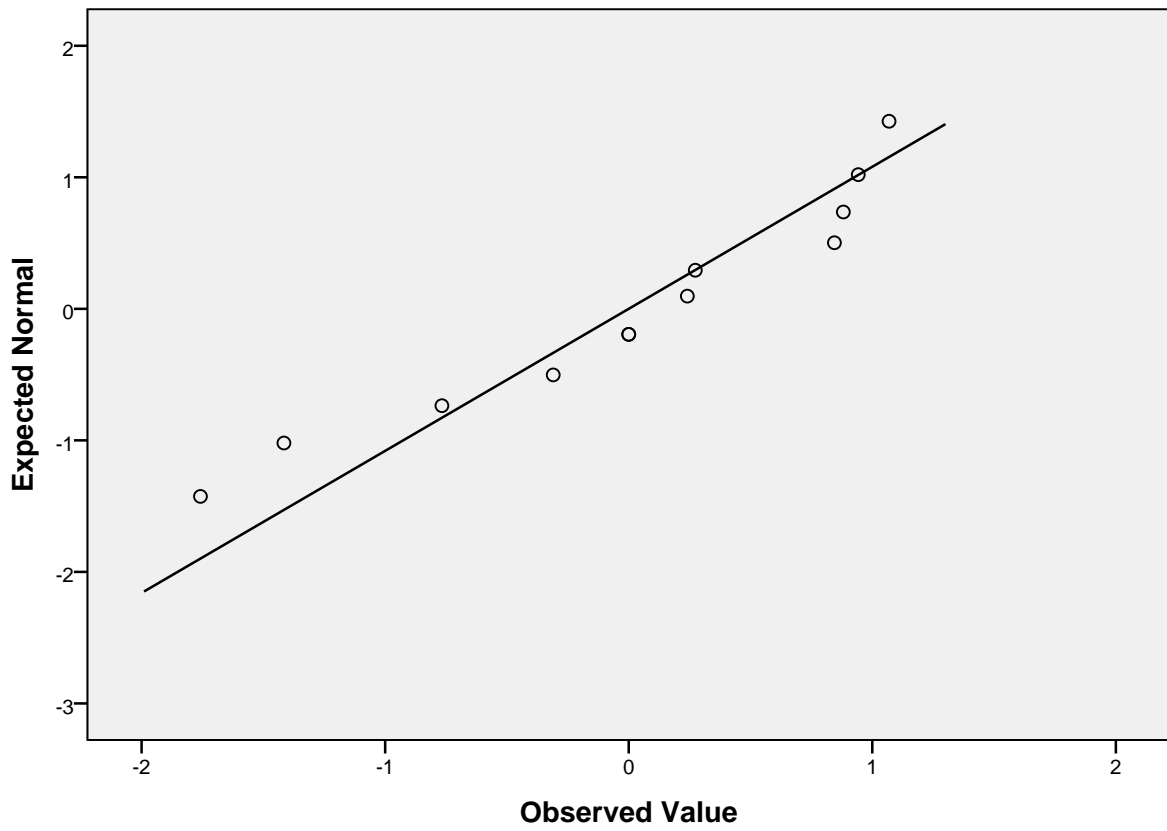

# Normal Q-Q Plot of Standardized Residual for Sec\_40

Treatment= PLA

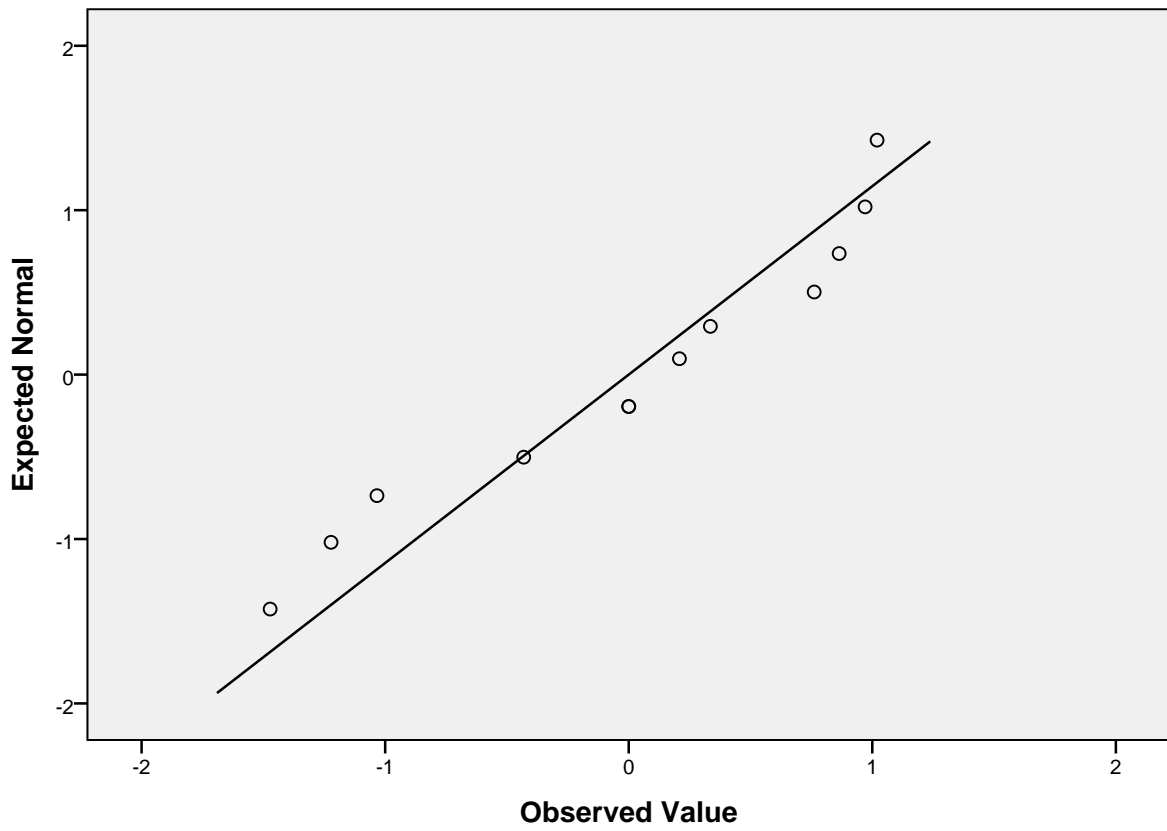

### Normal Q-Q Plot of Standardized Residual for Sec\_50

Treatment= PLA

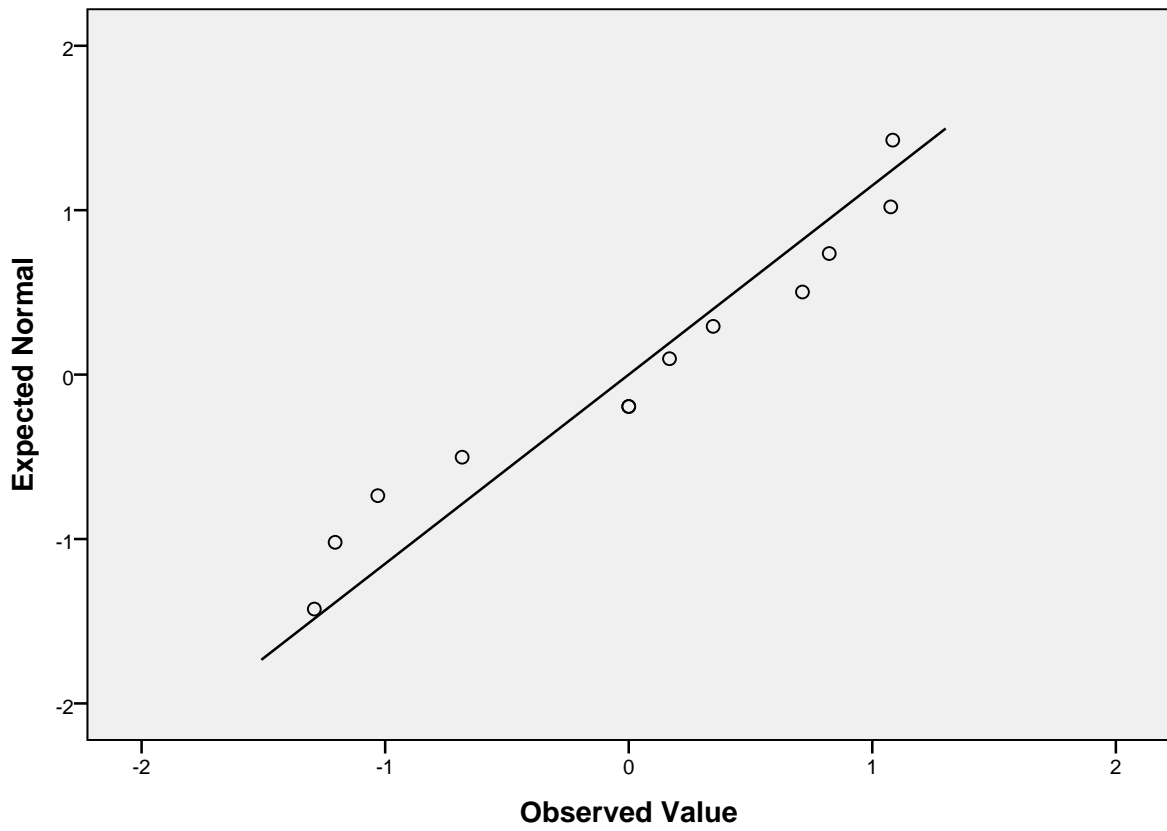

### Normal Q-Q Plot of Standardized Residual for Sec\_60

Treatment= PLA

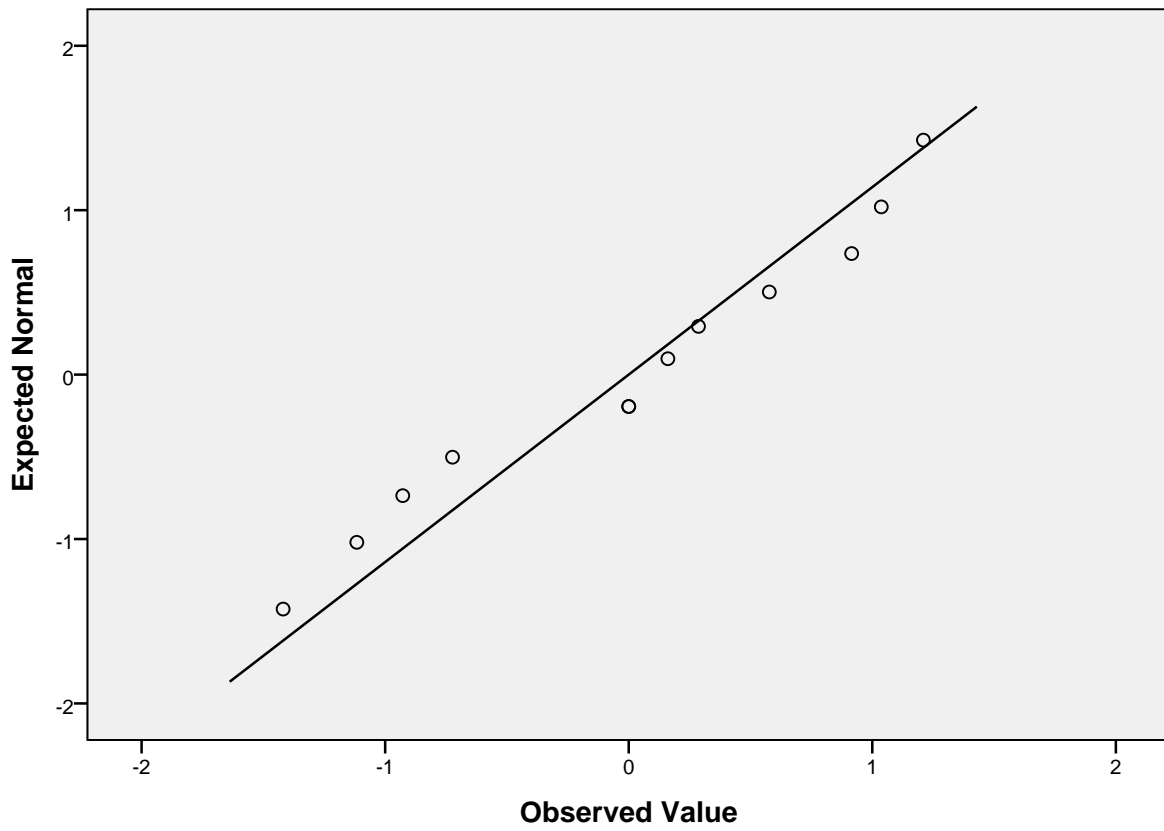

### Detrended Normal Q-Q Plots of Standardized residual for tHb During Exercise

**Detrended Normal Q-Q Plot of Standardized Residual for Pre**

Treatment= PLA

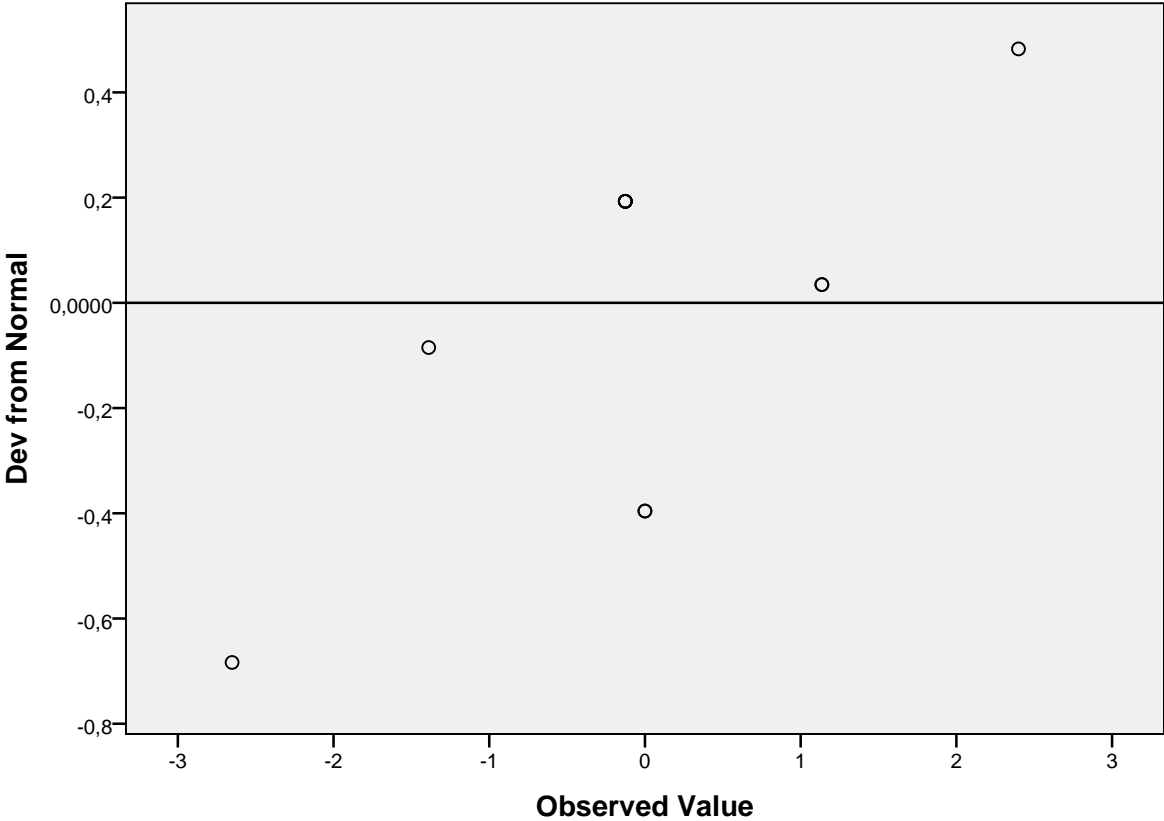

### Detrended Normal Q-Q Plot of Standardized Residual for Sec\_1

Treatment= PLA

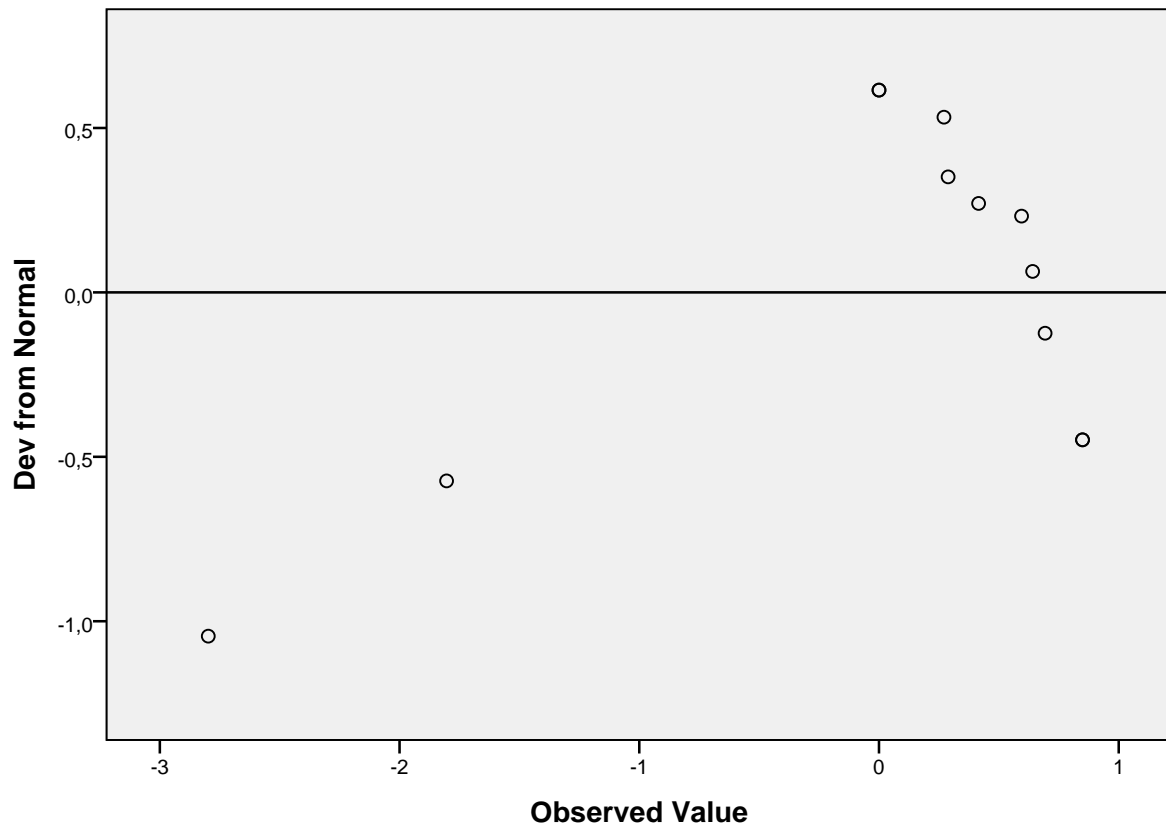

### Detrended Normal Q-Q Plot of Standardized Residual for Sec\_5

Treatment= PLA

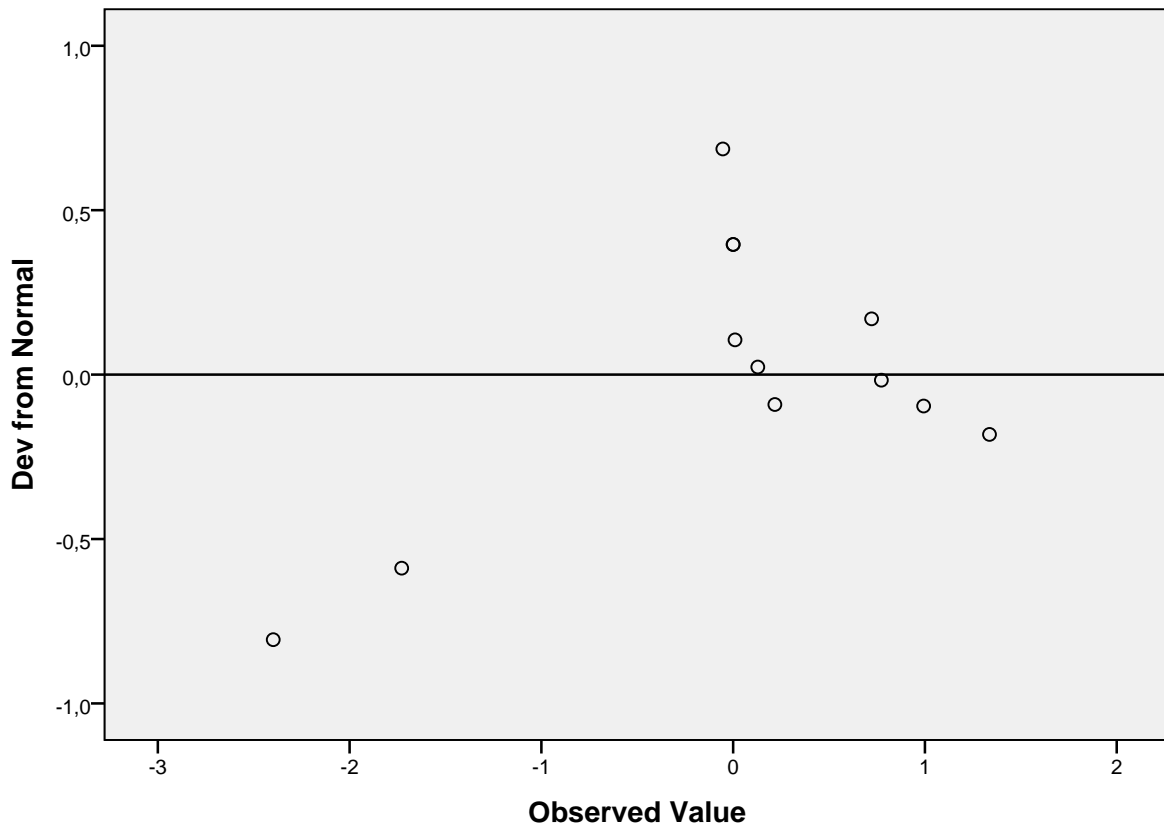

### Detrended Normal Q-Q Plot of Standardized Residual for Sec\_10

Treatment= PLA

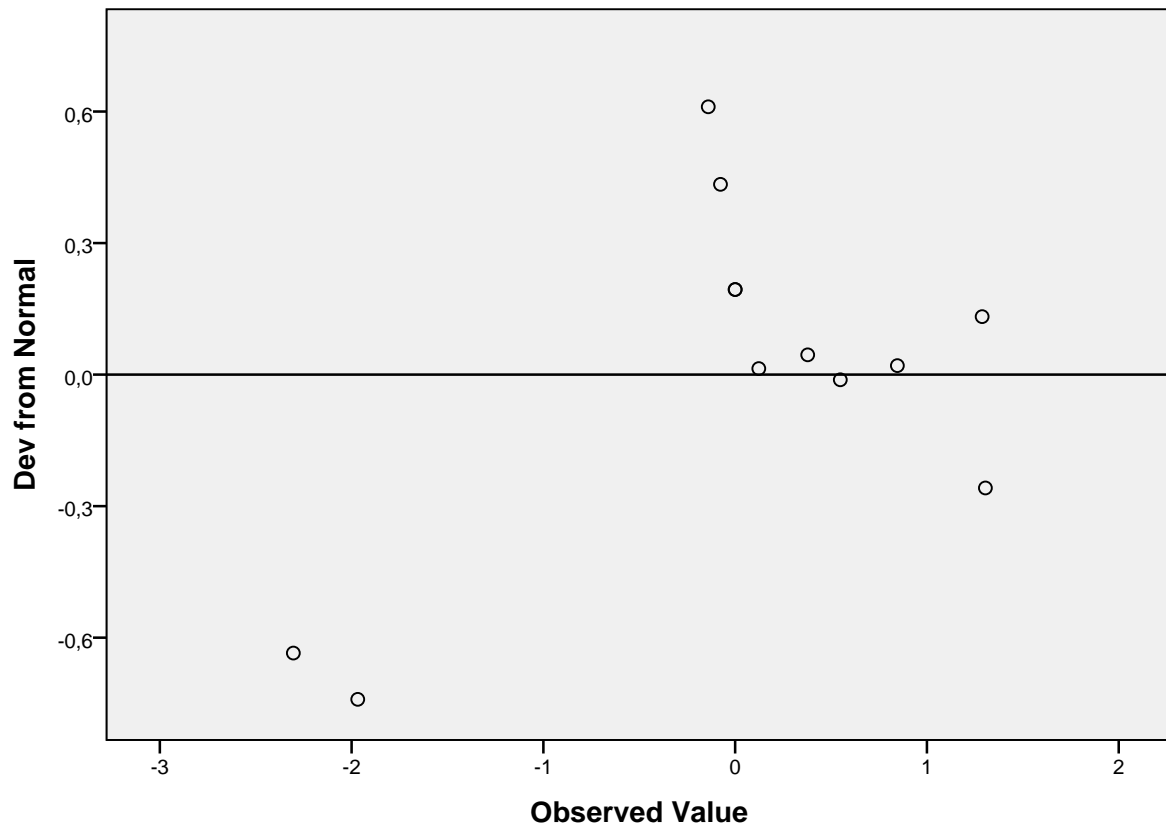



### Detrended Normal Q-Q Plot of Standardized Residual for Sec\_20

Treatment= PLA

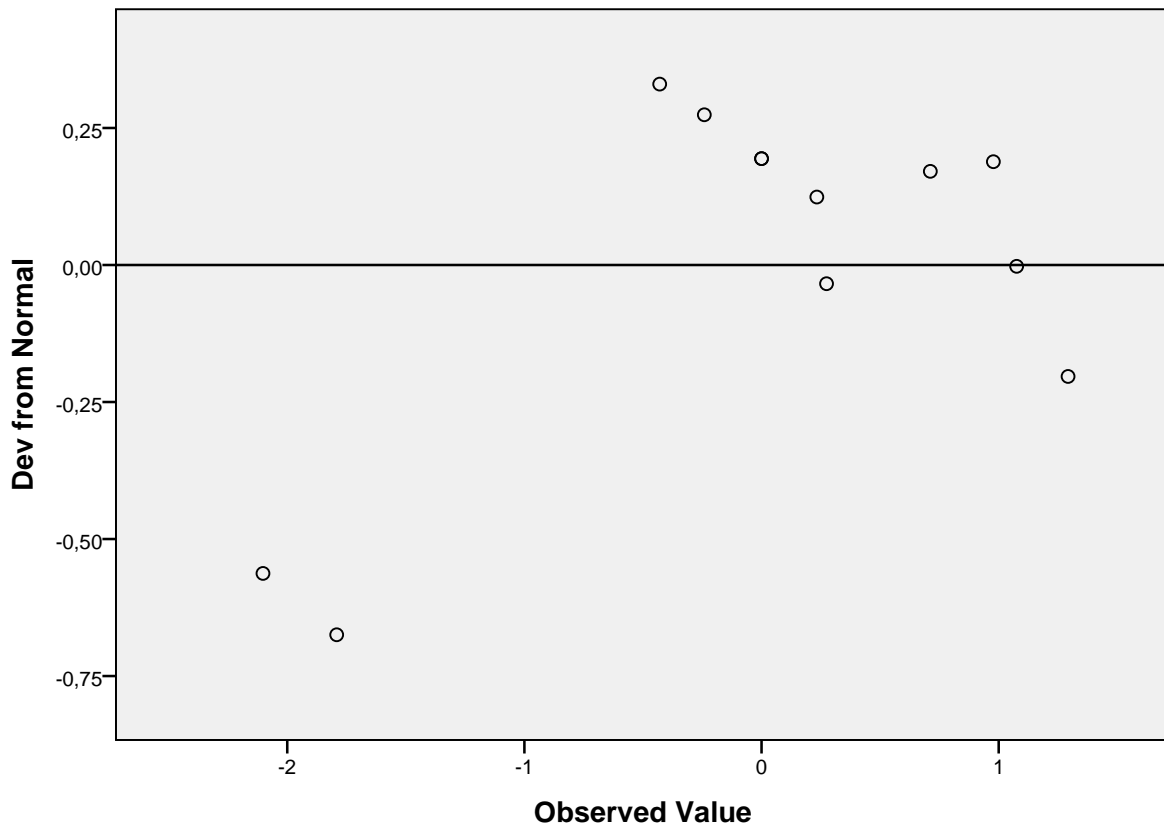

### Detrended Normal Q-Q Plot of Standardized Residual for Sec\_30

Treatment= PLA

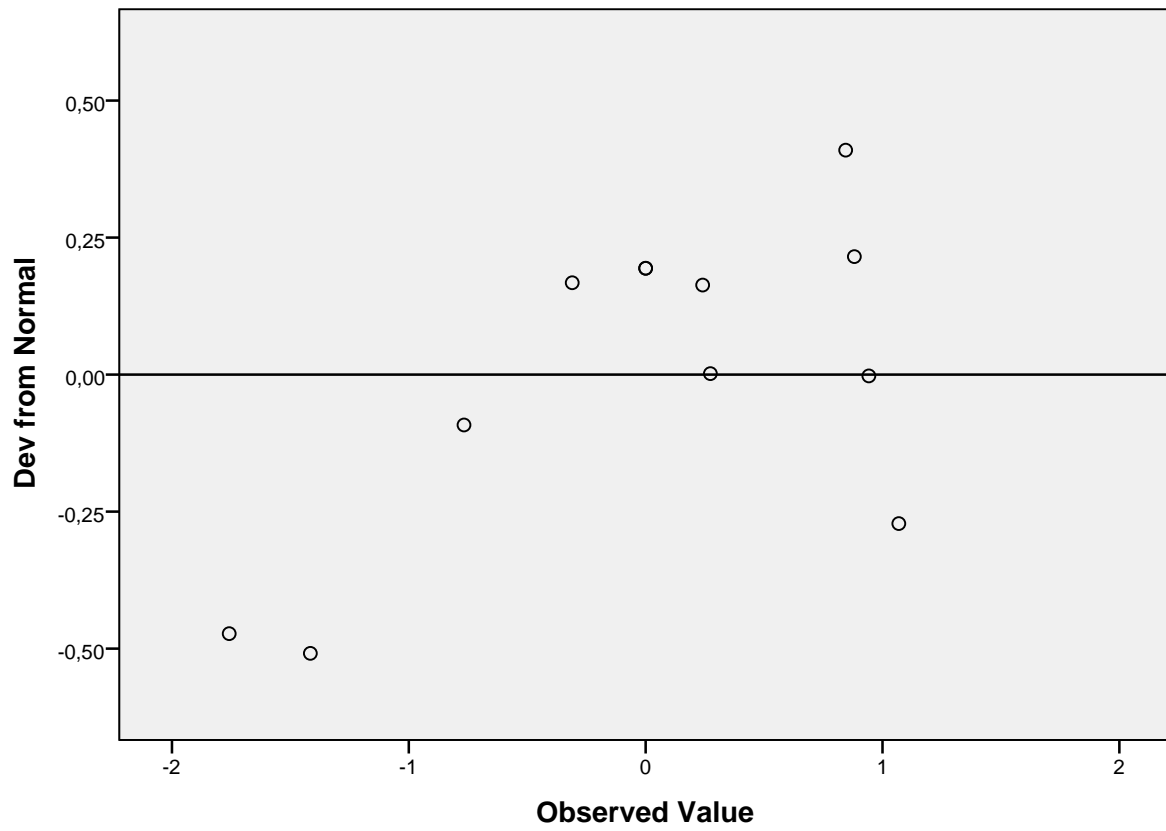

### Detrended Normal Q-Q Plot of Standardized Residual for Sec\_40

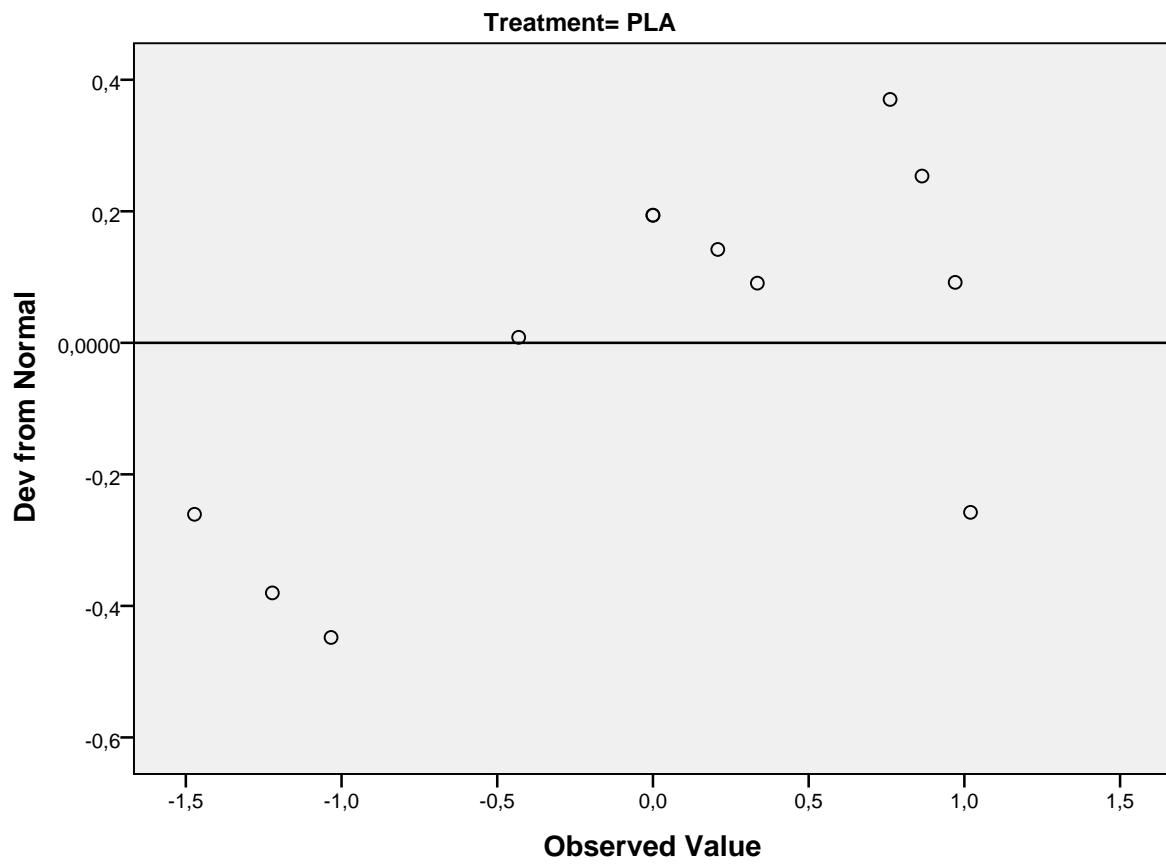

### Detrended Normal Q-Q Plot of Standardized Residual for Sec\_50

Treatment= PLA

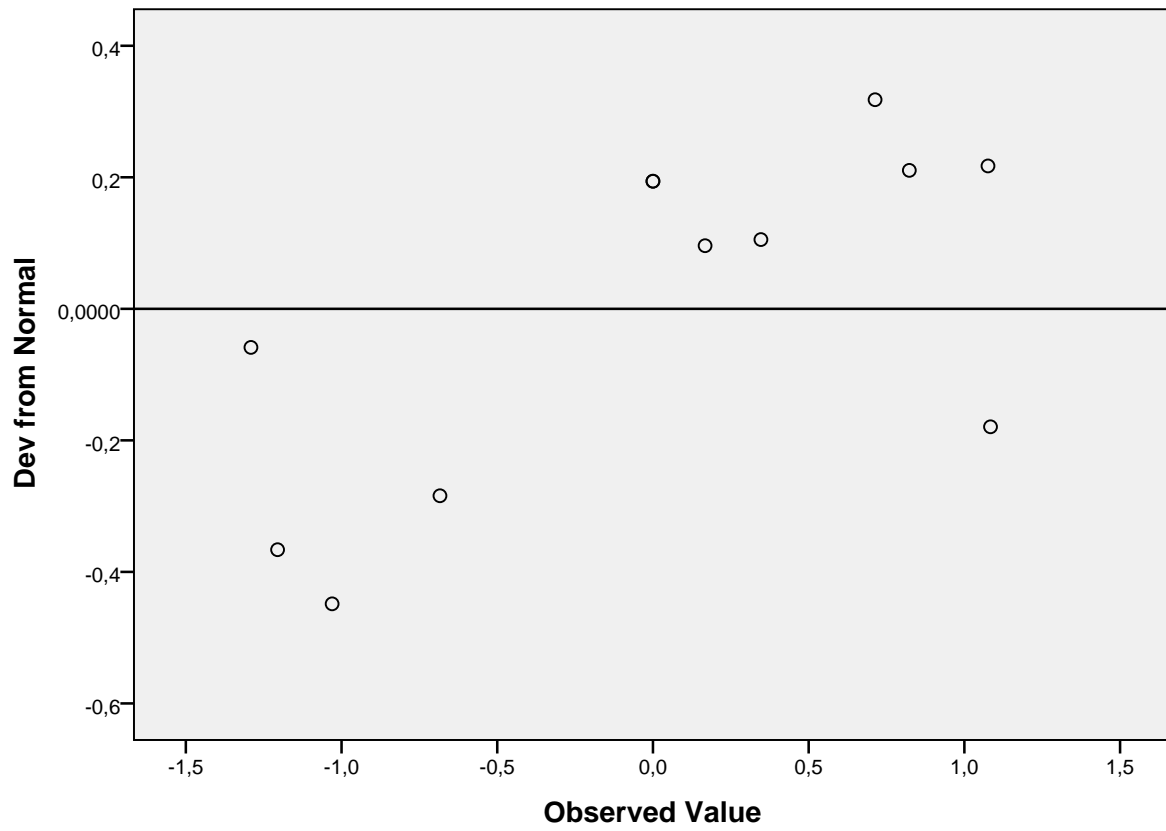

### Detrended Normal Q-Q Plot of Standardized Residual for Sec\_60

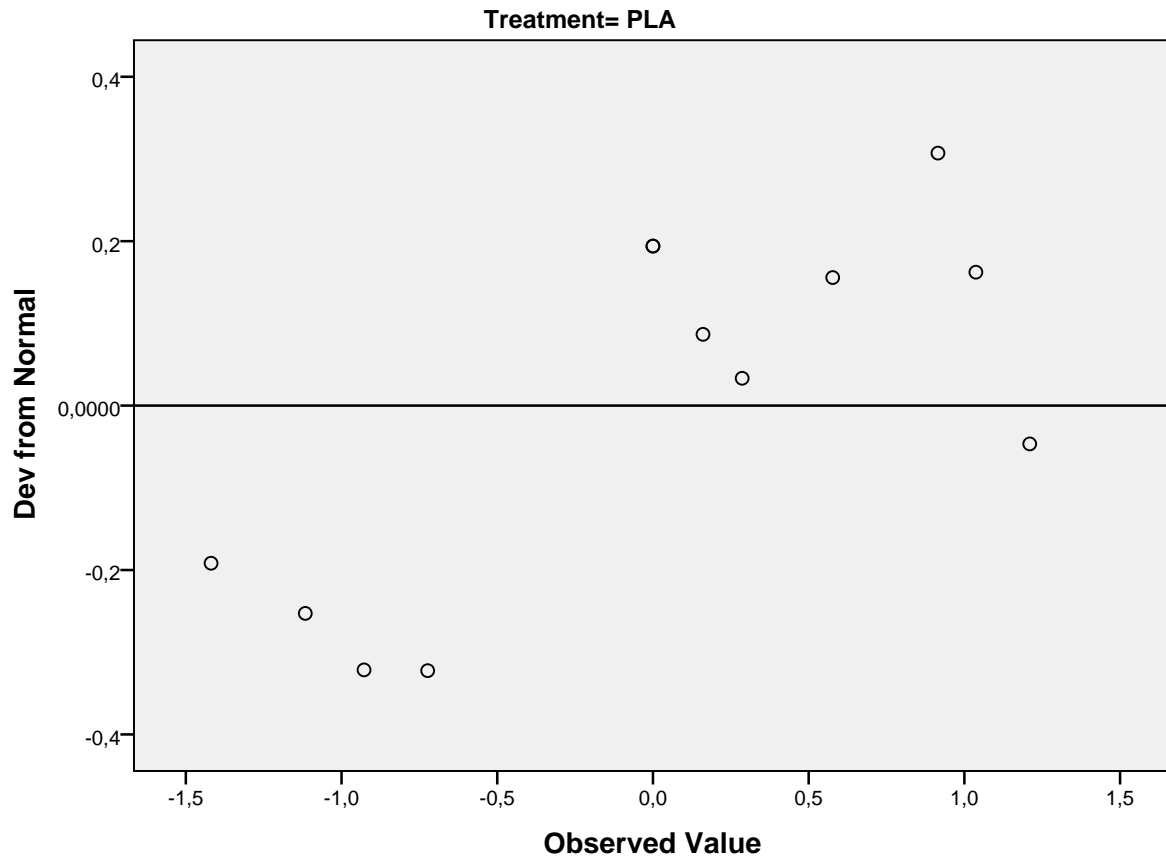

Treatment: PLA

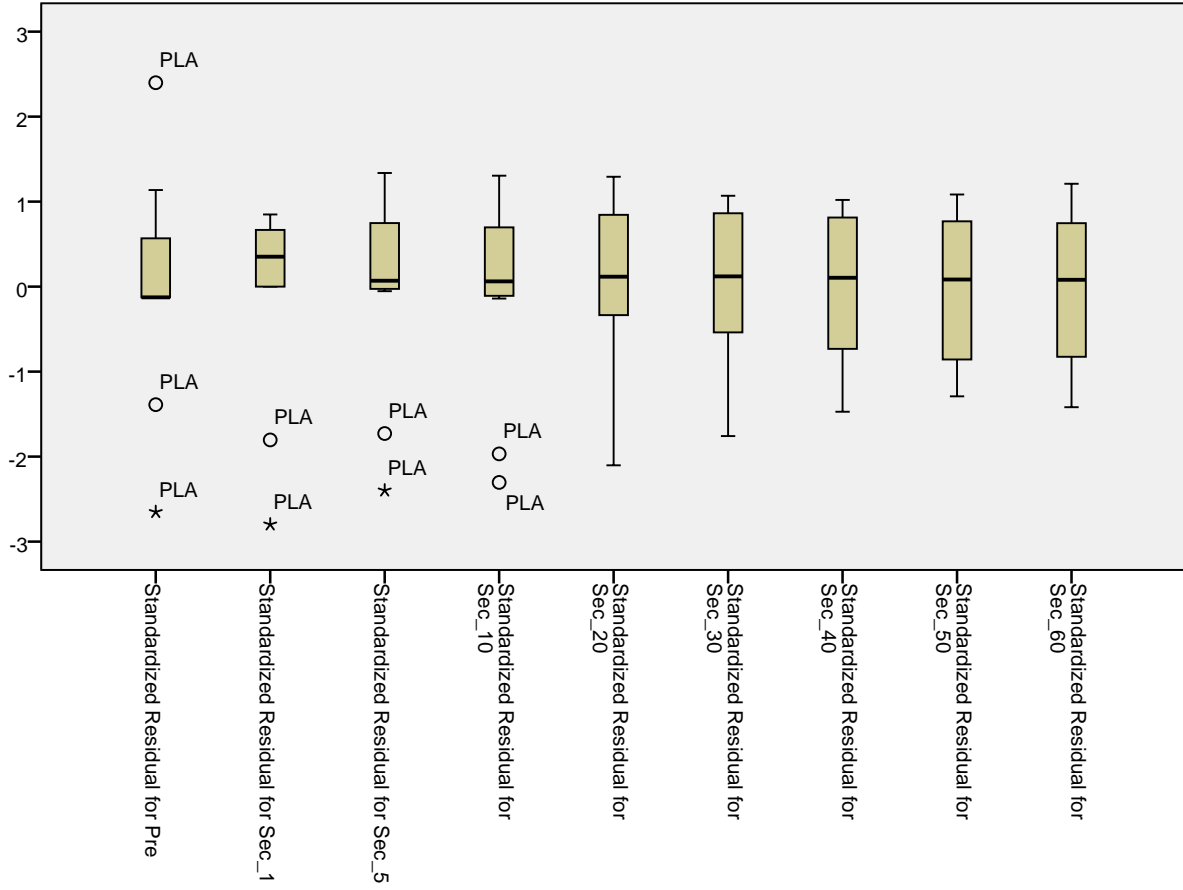

**Normal Q-Q Plots of Standardized Residual for tHb During Recovery**

**Normal Q-Q Plot of Standardized Residual for Pre**

Treatment= BG

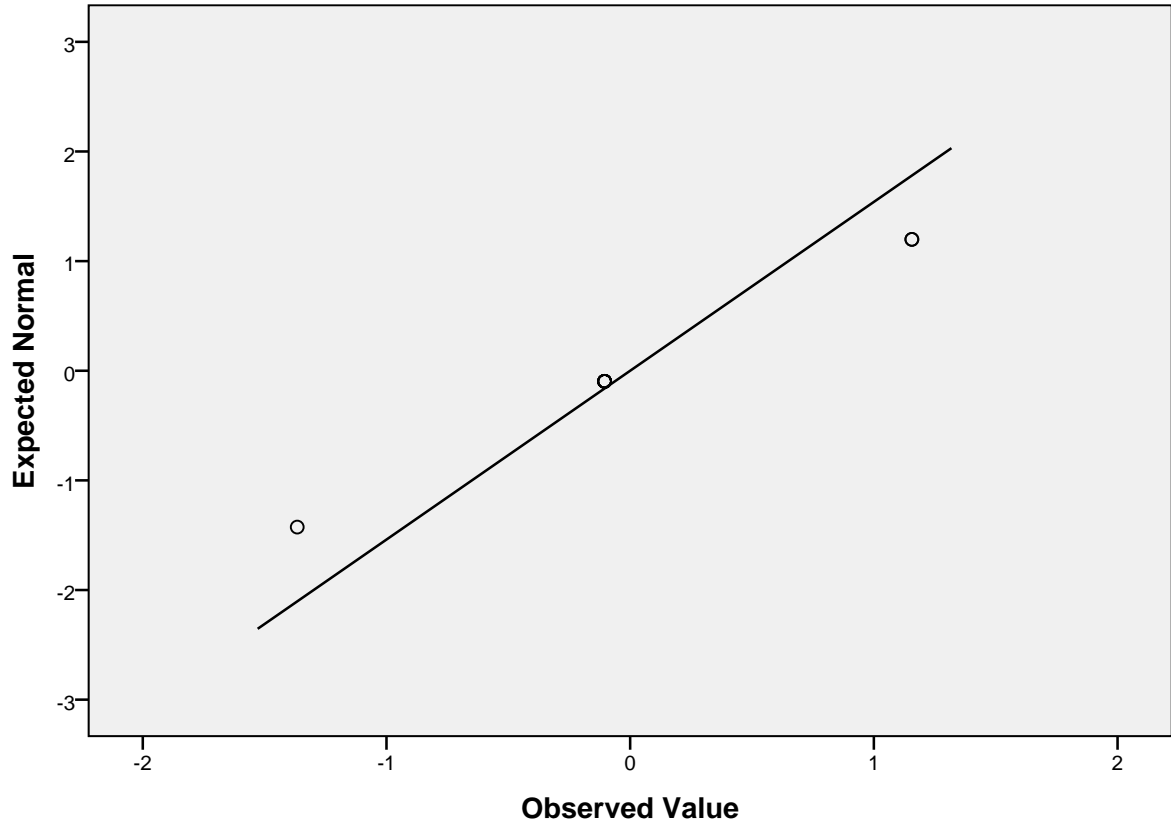

### Normal Q-Q Plot of Standardized Residual for Post

Treatment= BG

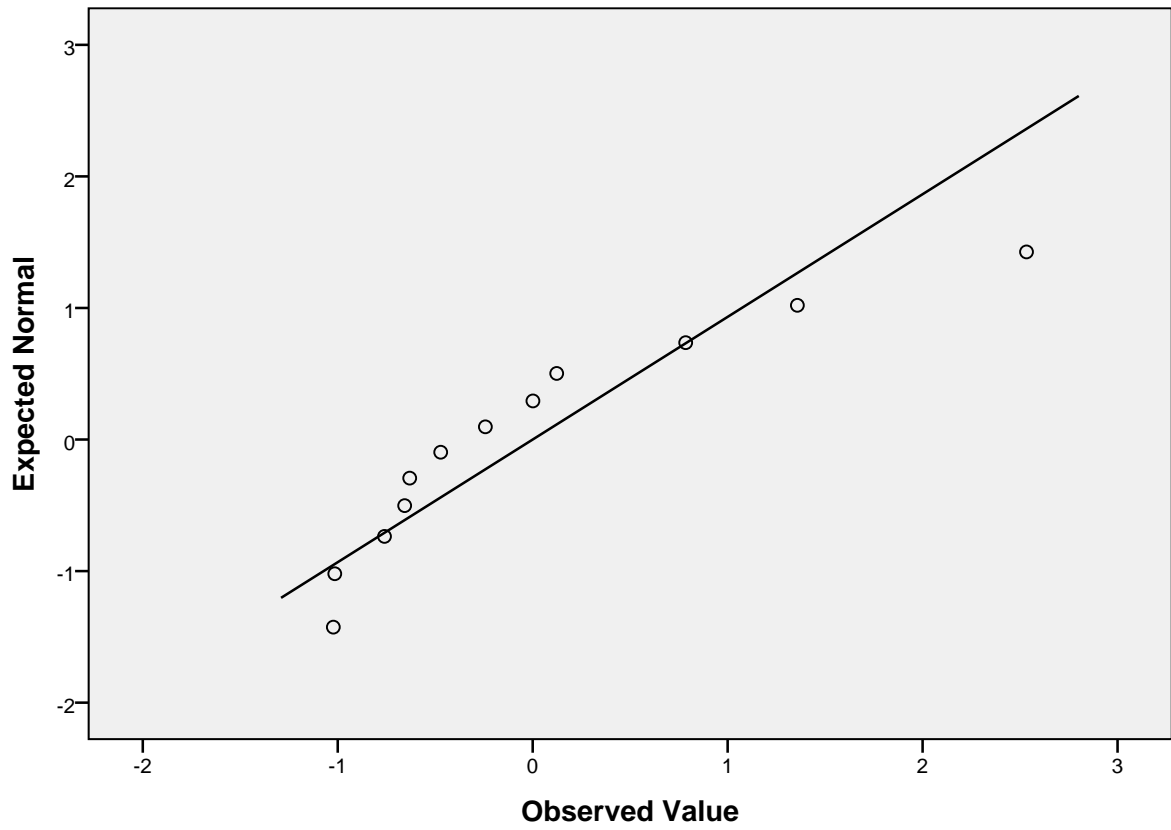



### Normal Q-Q Plot of Standardized Residual for Sec\_1

Treatment= BG

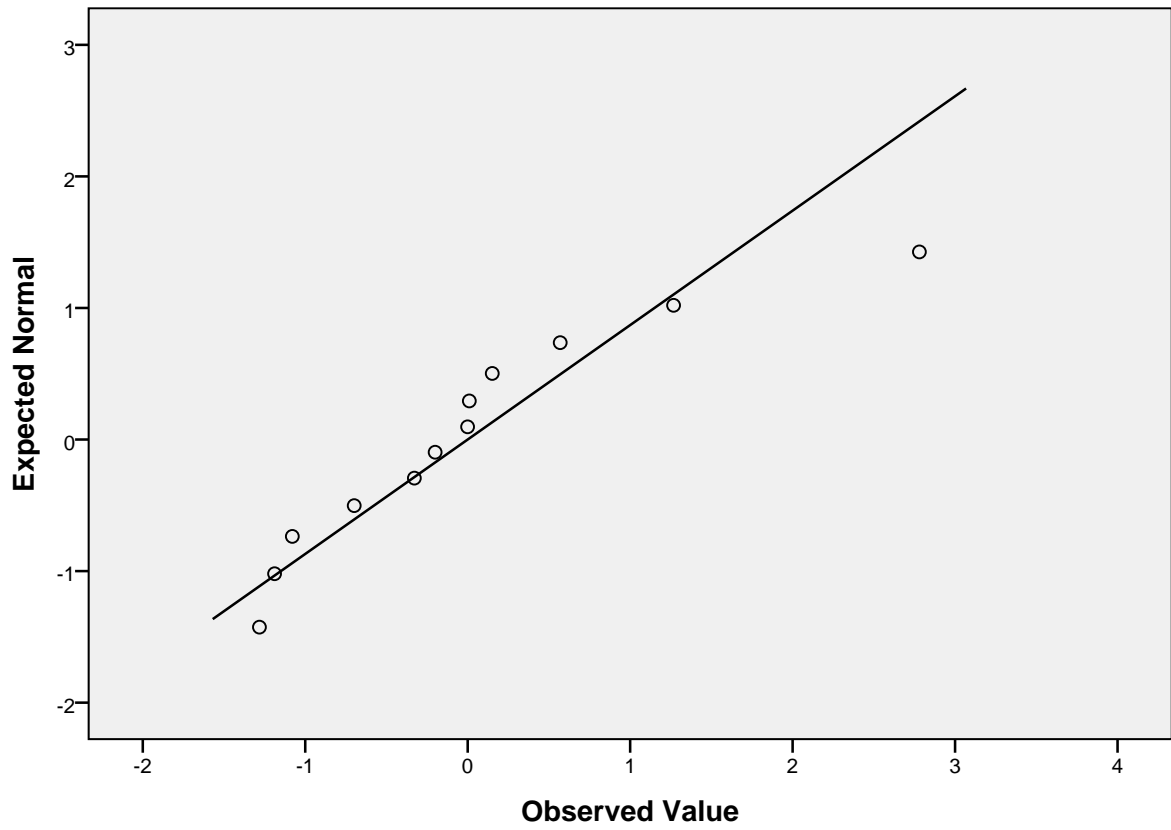

### Normal Q-Q Plot of Standardized Residual for Sec\_5

Treatment= BG

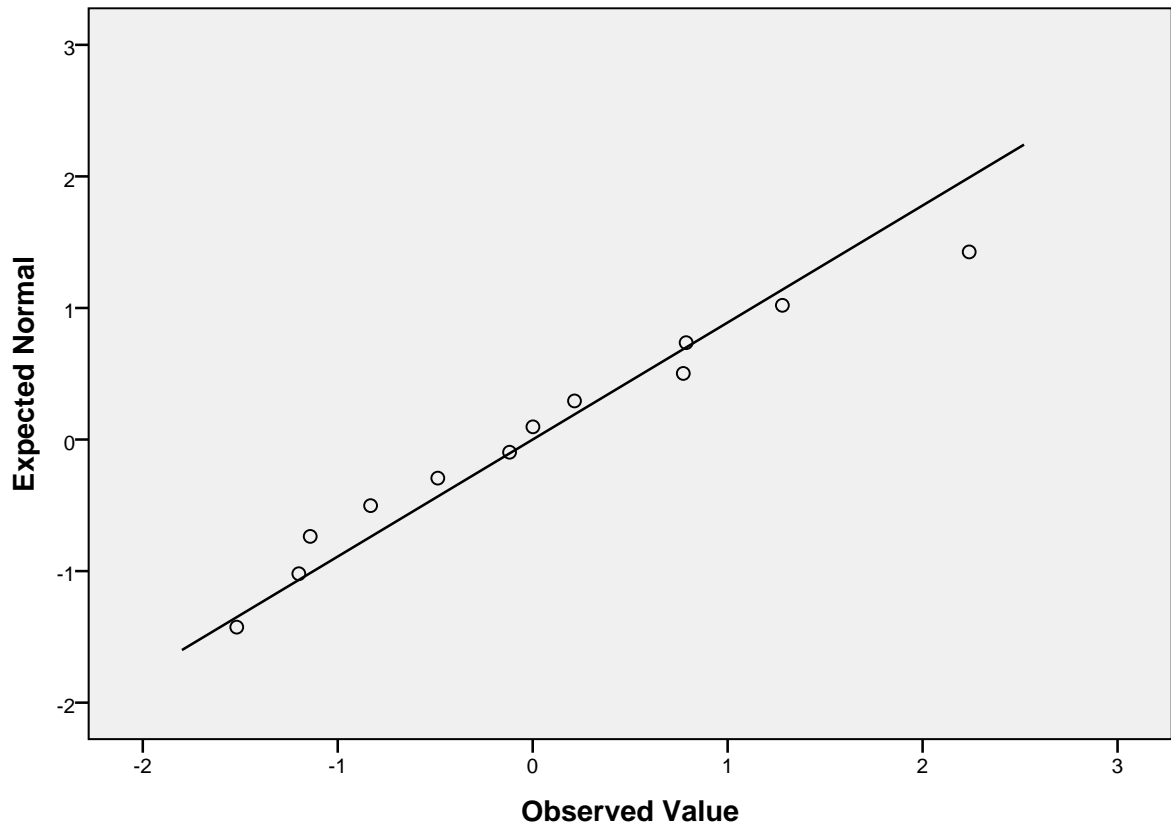

### Normal Q-Q Plot of Standardized Residual for Sec\_10

Treatment= BG

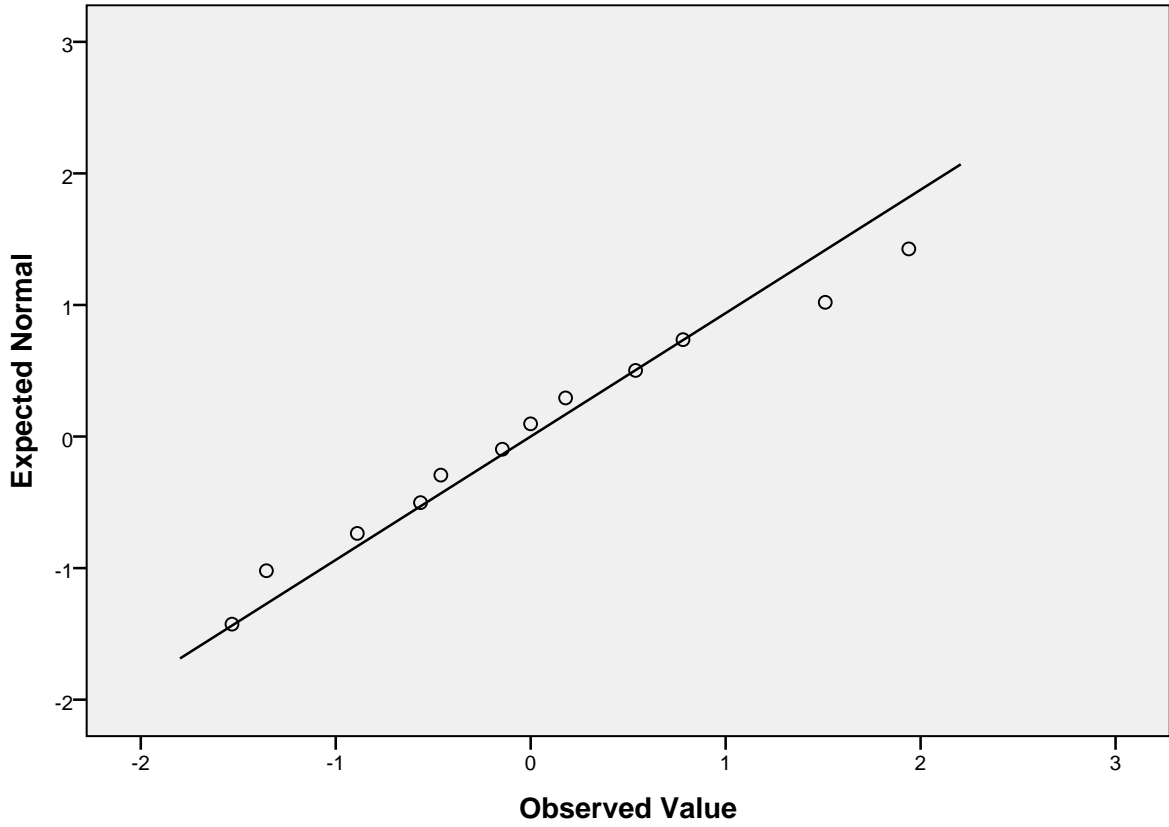

### Normal Q-Q Plot of Standardized Residual for Sec\_20

Treatment= BG

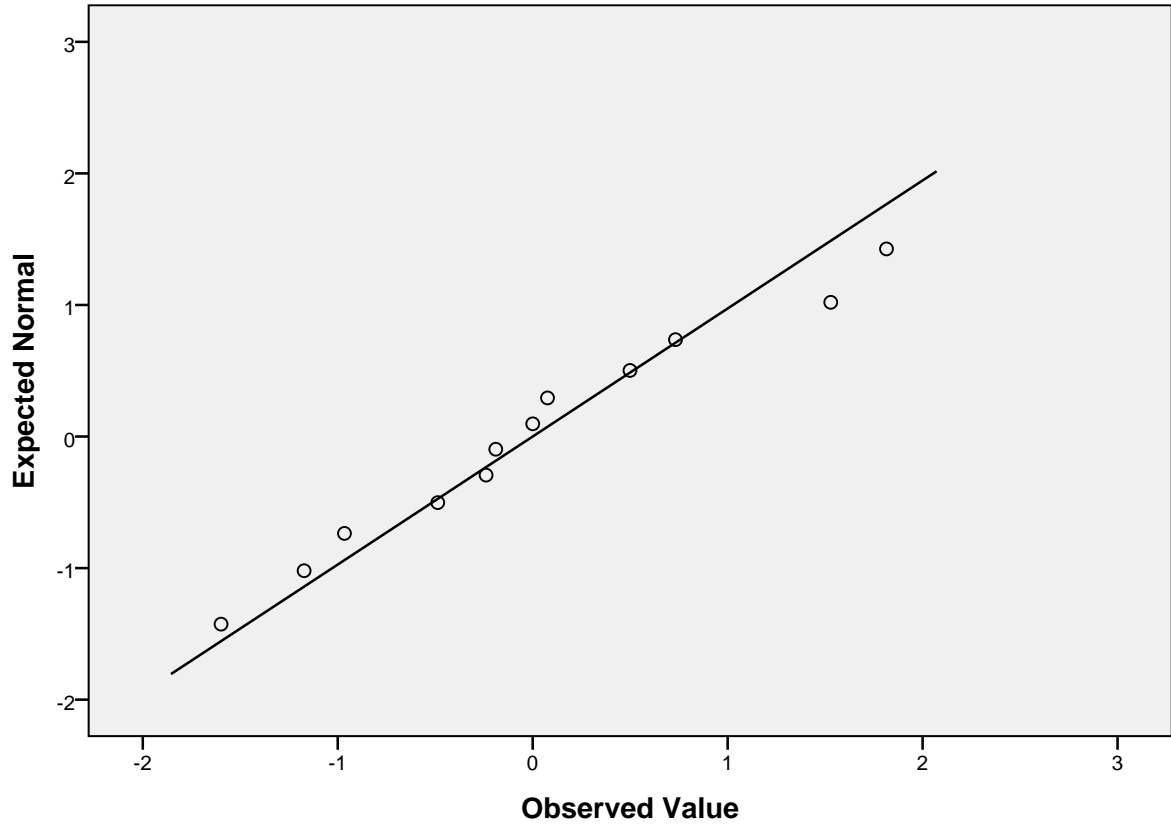

### Normal Q-Q Plot of Standardized Residual for Sec\_30

Treatment= BG

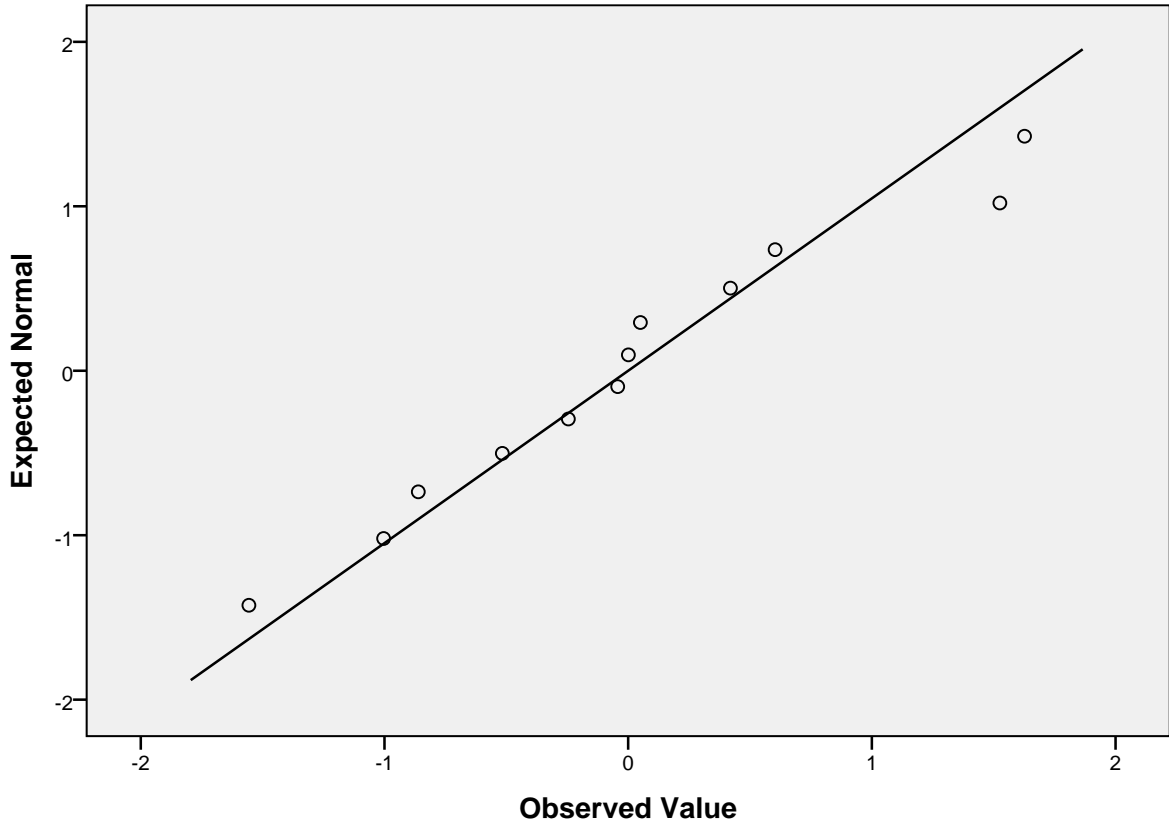

### Normal Q-Q Plot of Standardized Residual for Sec\_40

Treatment= BG

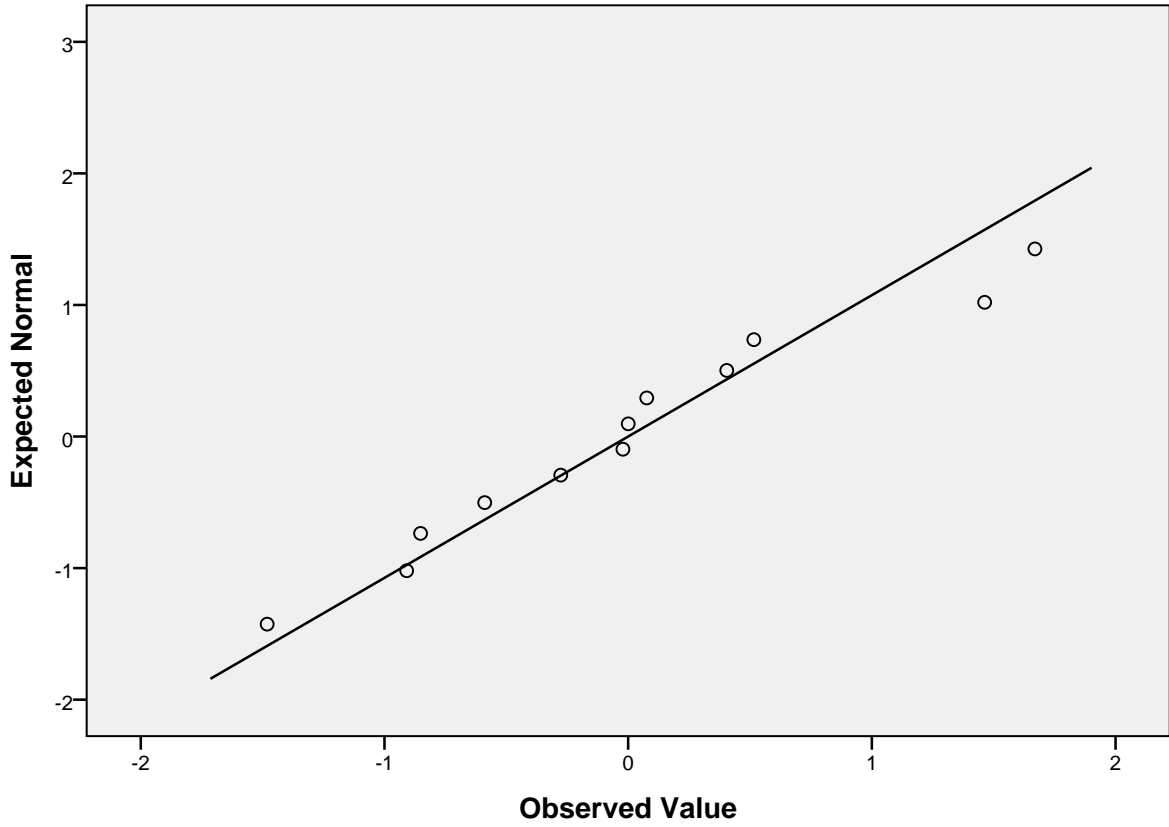

### Normal Q-Q Plot of Standardized Residual for Sec\_50

Treatment= BG

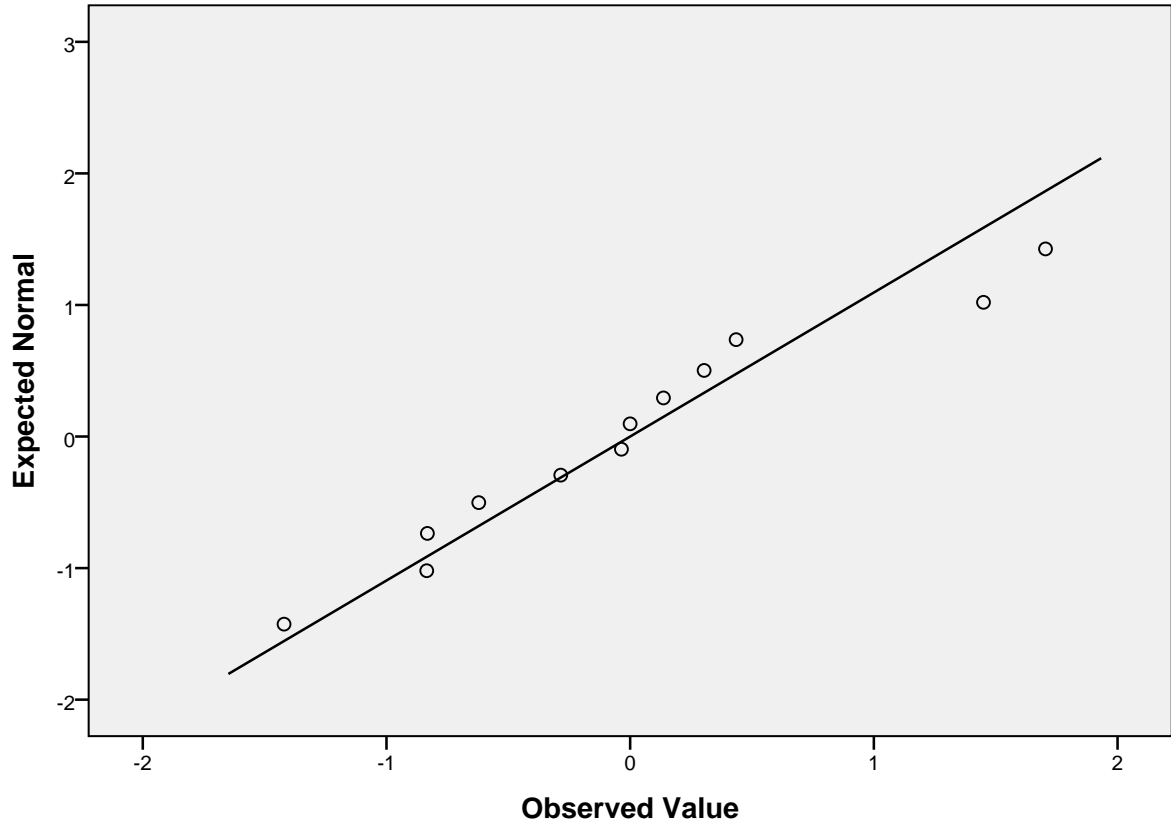

### Normal Q-Q Plot of Standardized Residual for Sec\_60

Treatment= BG

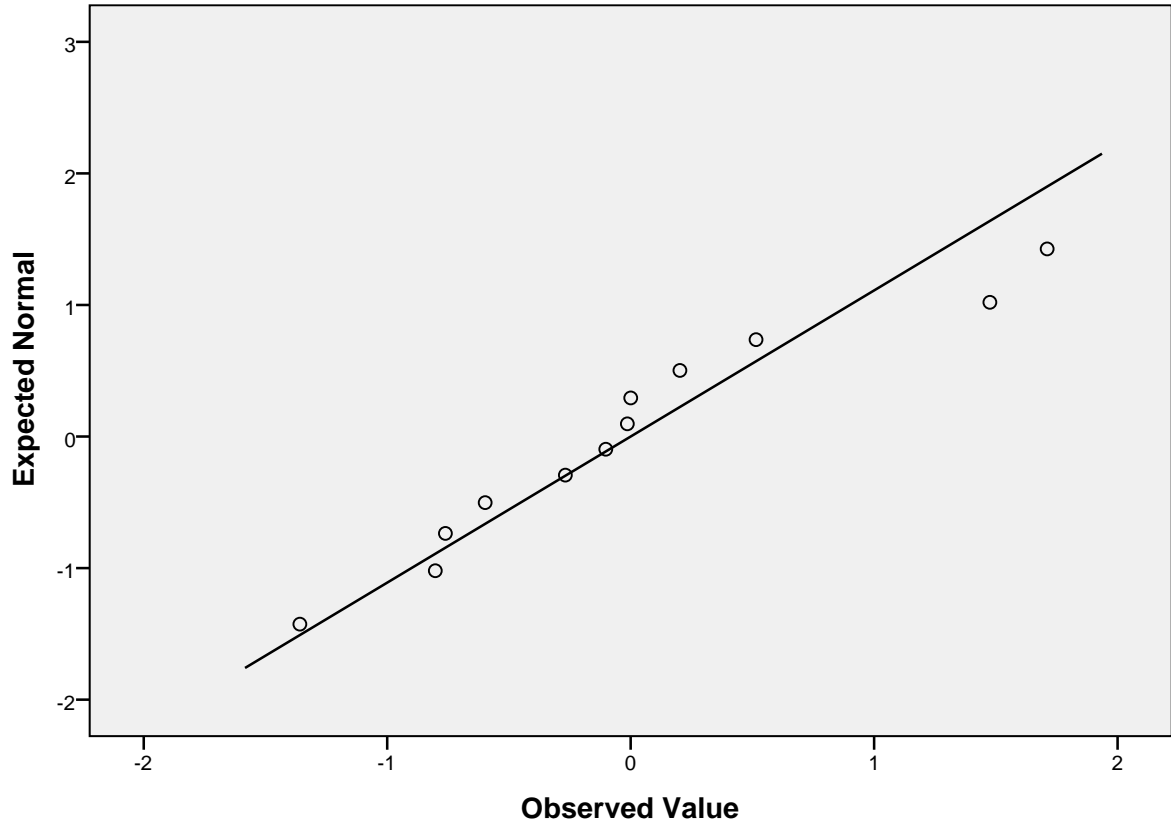

### Detrended Normal Q-Q Plots of Standardized Residual for tHb During Recovery



### Detrended Normal Q-Q Plot of Standardized Residual for Pre

Treatment= BG

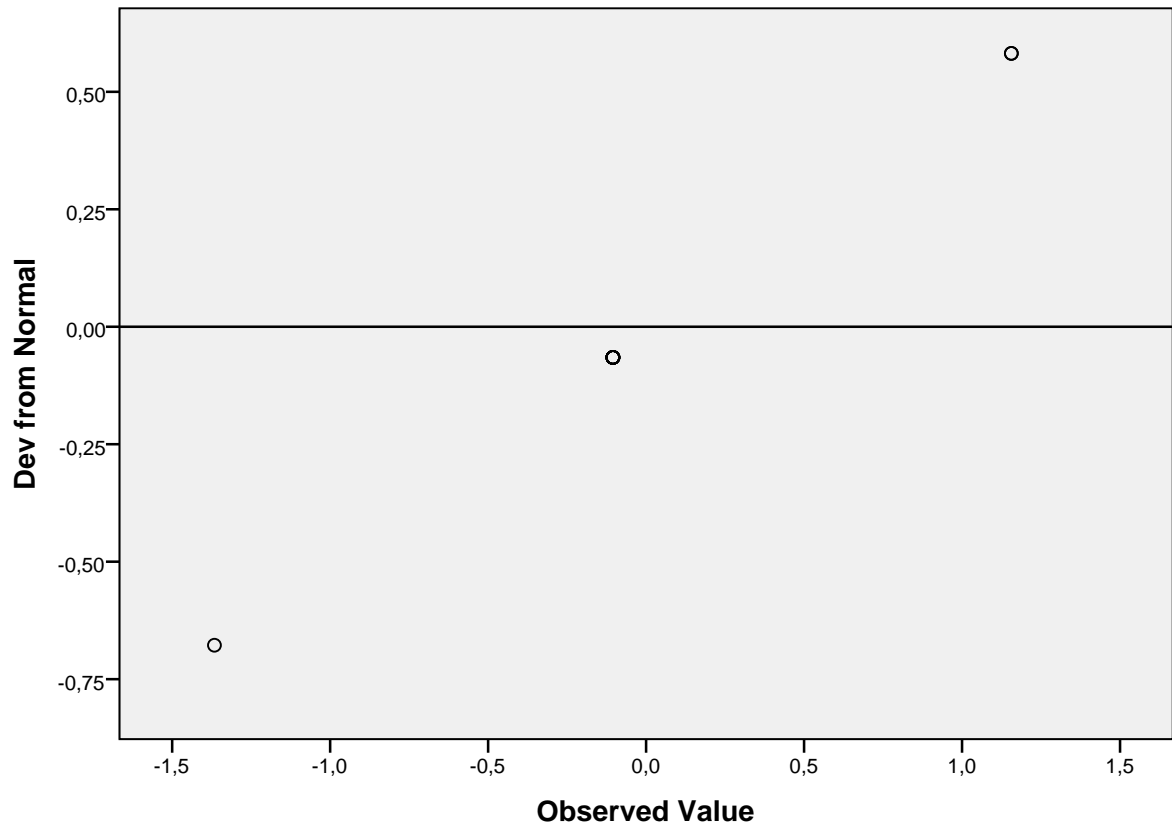

### Detrended Normal Q-Q Plot of Standardized Residual for Post

Treatment= BG

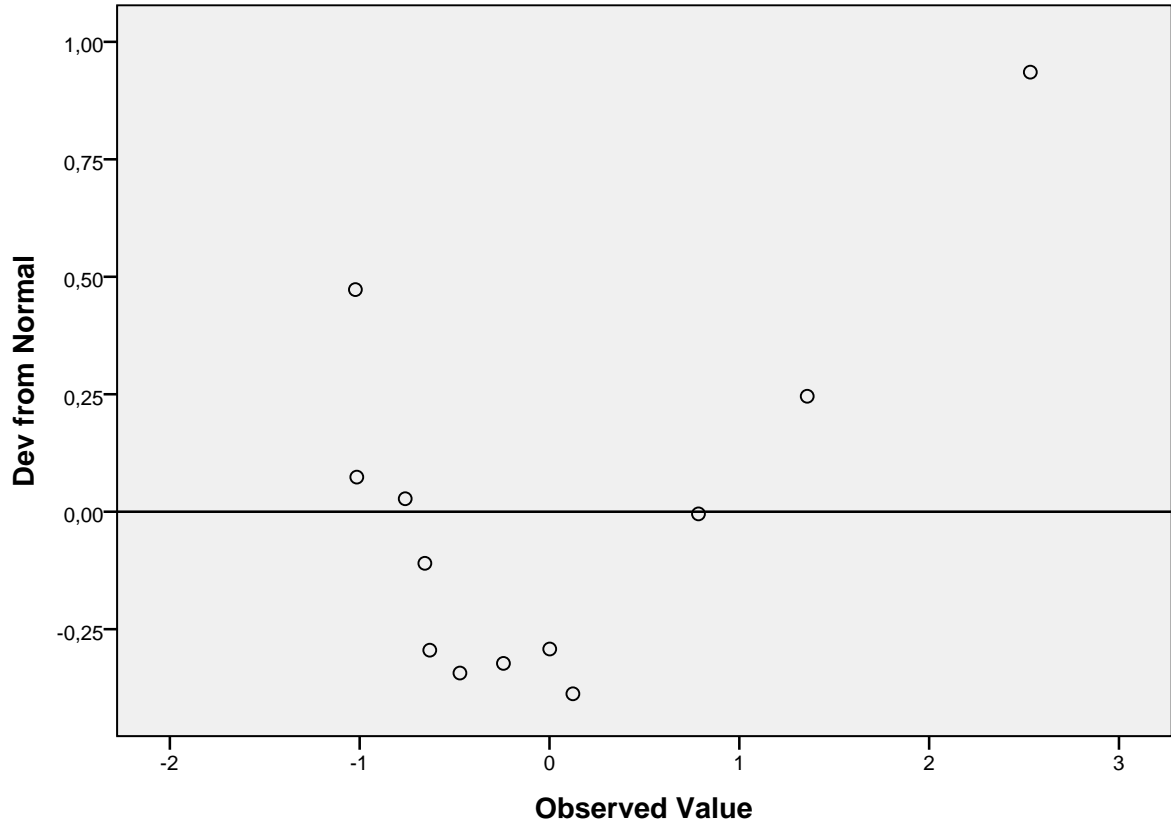

### Detrended Normal Q-Q Plot of Standardized Residual for Sec\_1

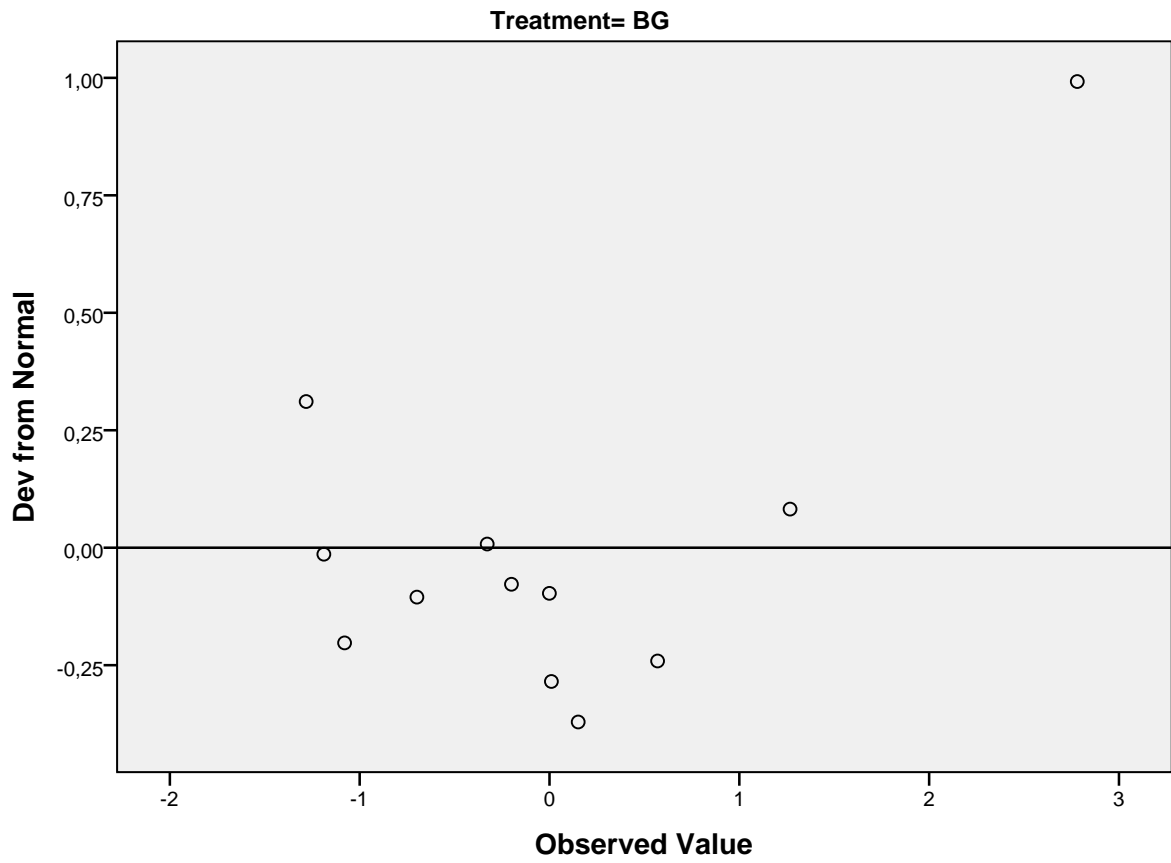

### Detrended Normal Q-Q Plot of Standardized Residual for Sec\_5

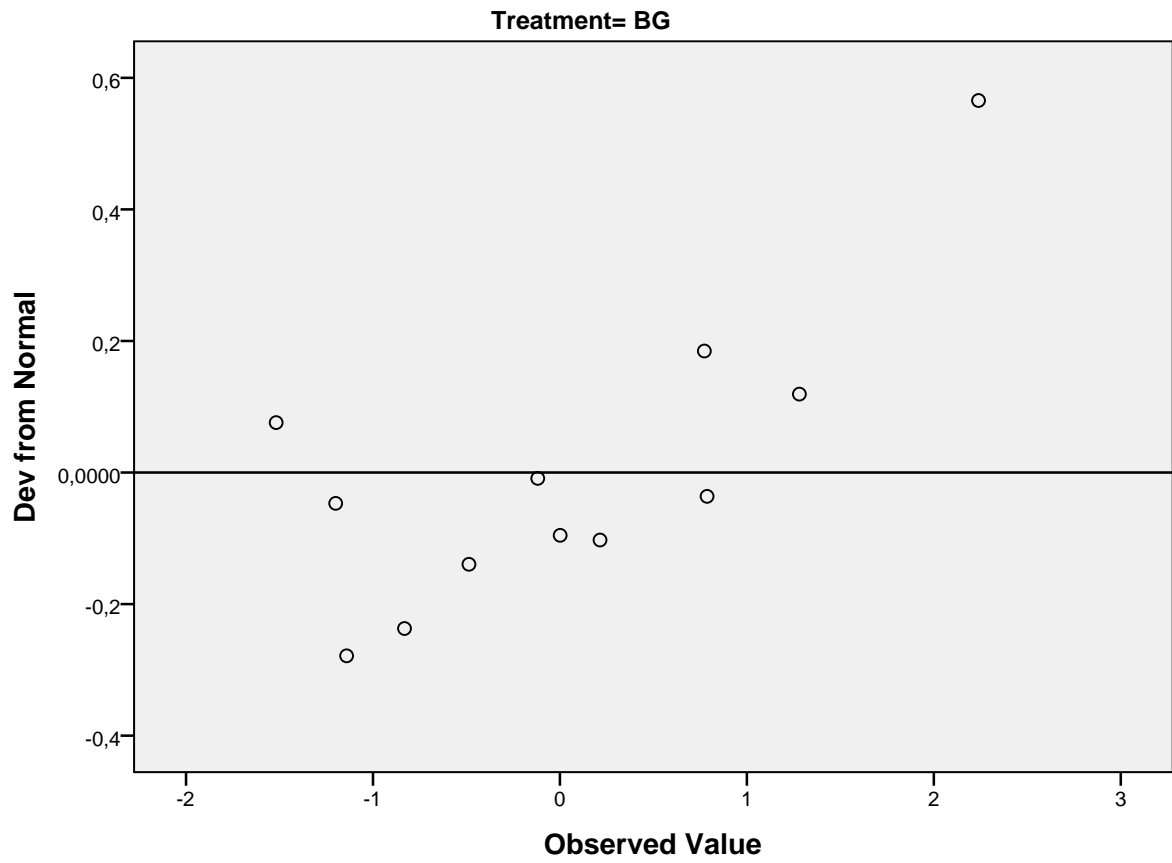

### Detrended Normal Q-Q Plot of Standardized Residual for Sec\_10

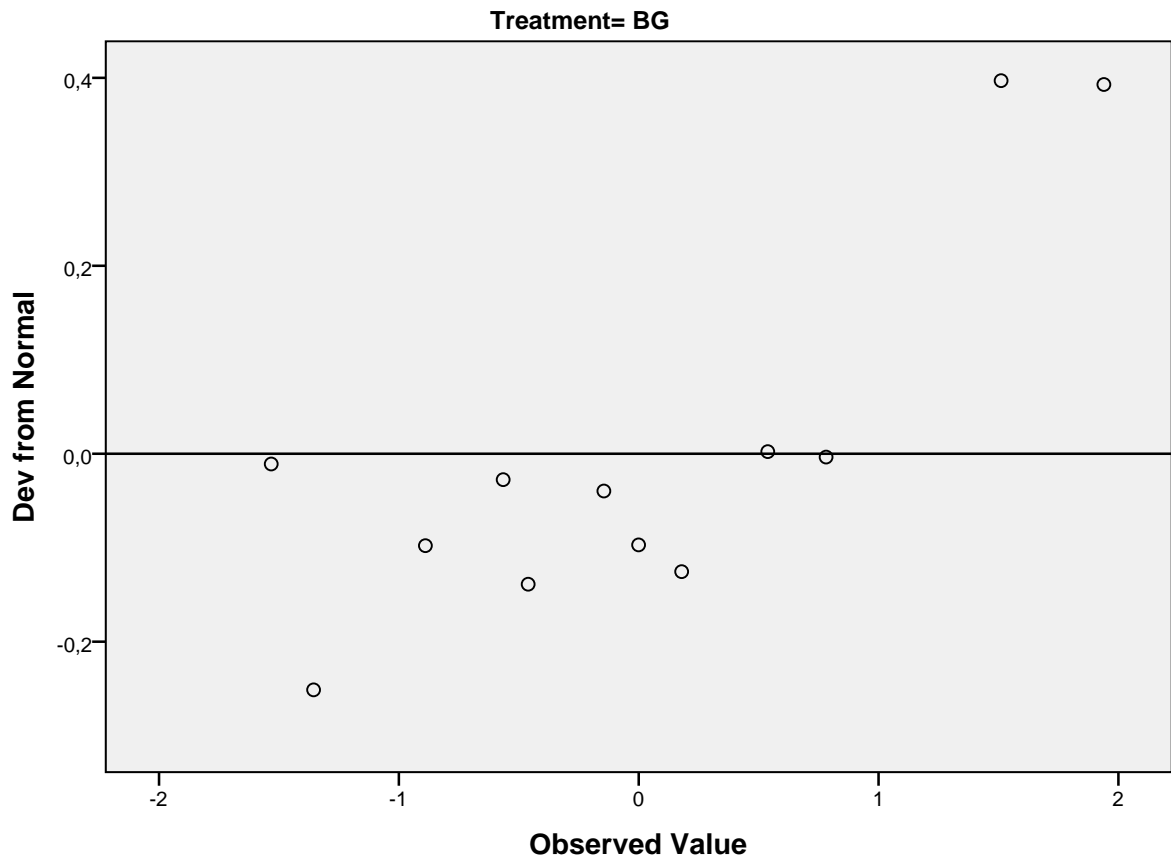

### Detrended Normal Q-Q Plot of Standardized Residual for Sec\_20

Treatment= BG

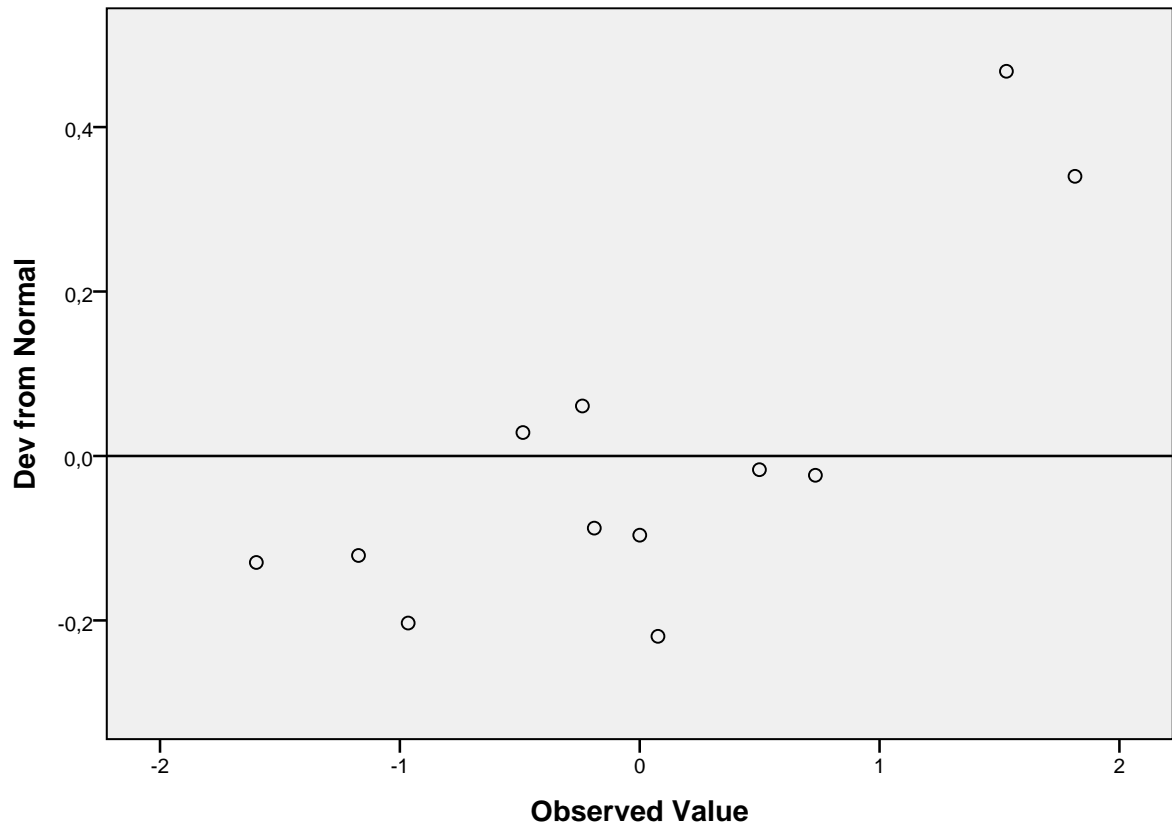

### Detrended Normal Q-Q Plot of Standardized Residual for Sec\_30

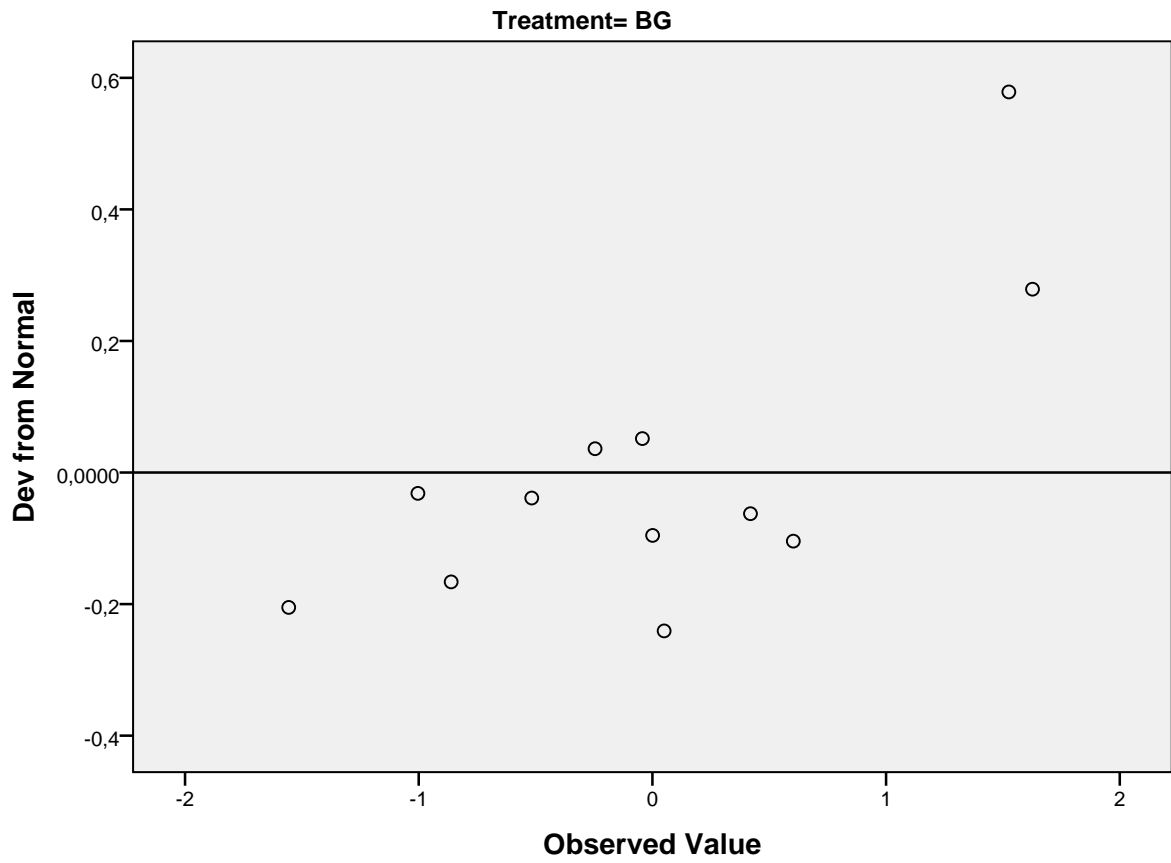

### Detrended Normal Q-Q Plot of Standardized Residual for Sec\_40

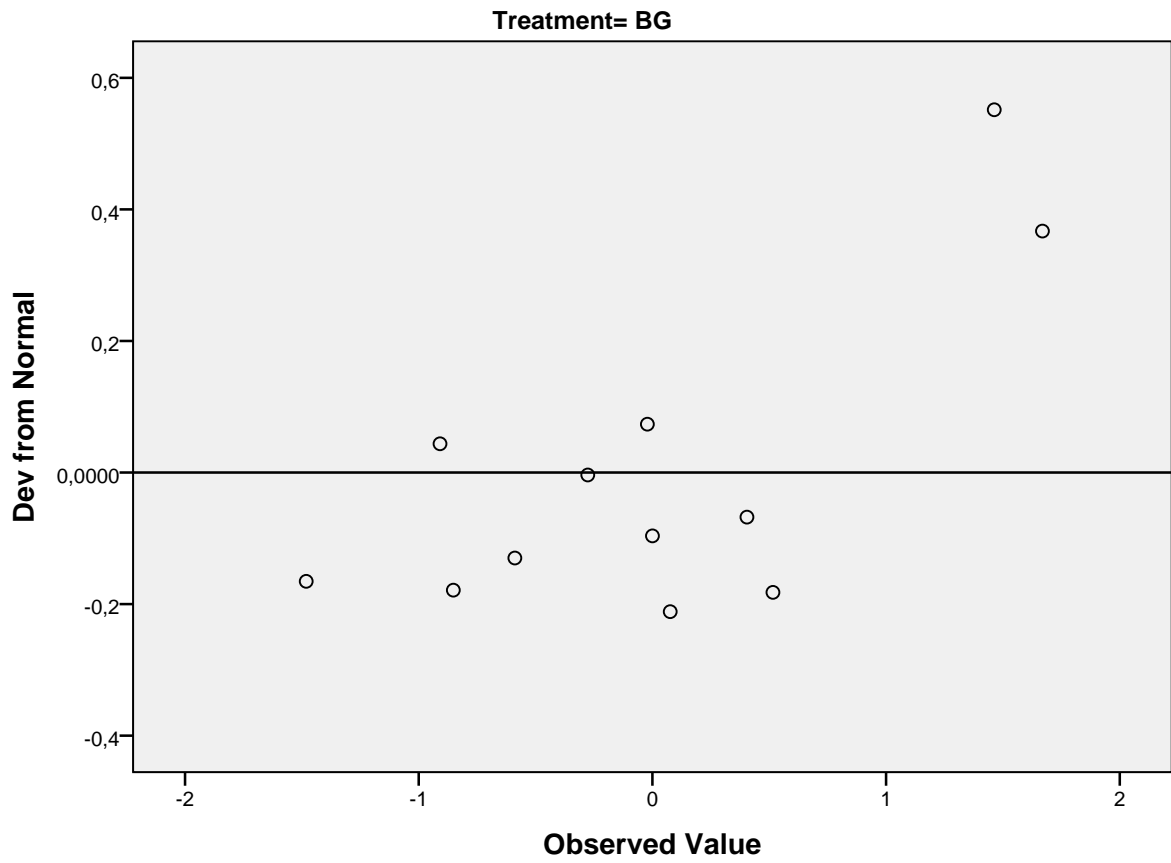



### Detrended Normal Q-Q Plot of Standardized Residual for Sec\_50

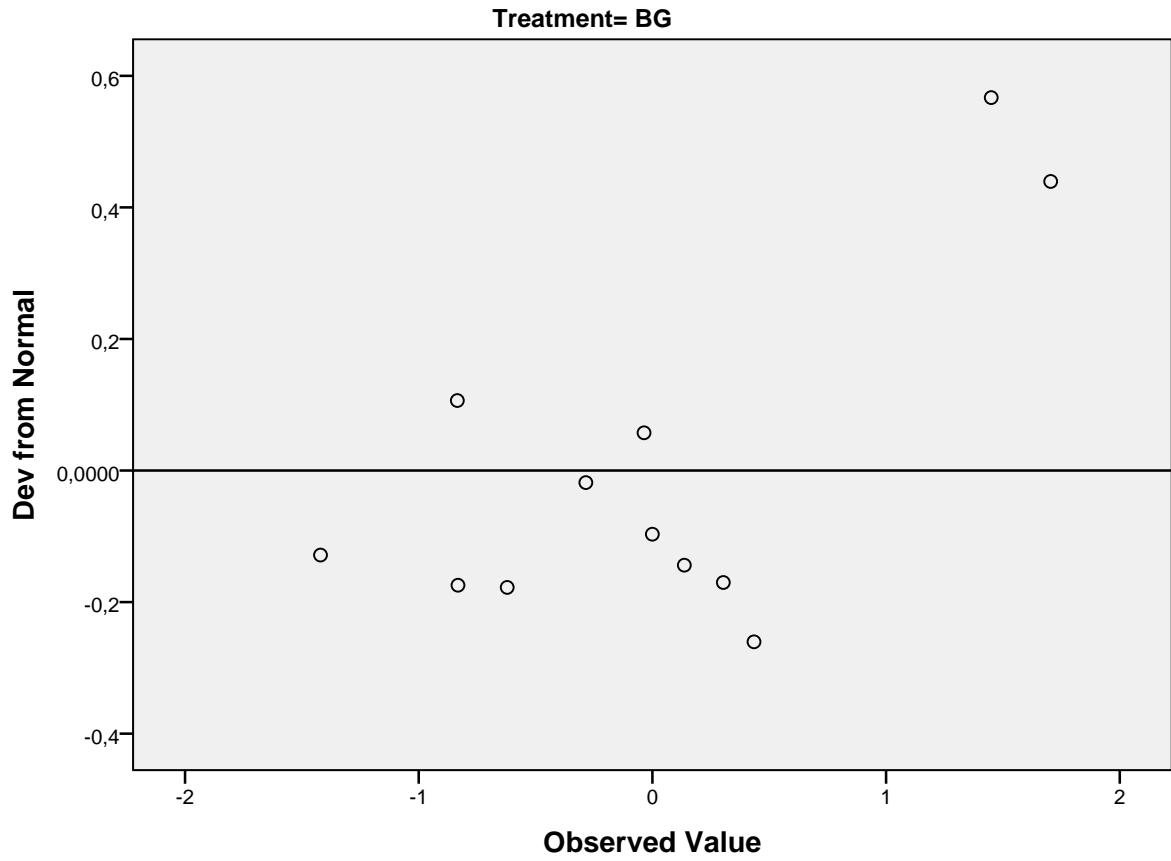

### Detrended Normal Q-Q Plot of Standardized Residual for Sec\_60

Treatment= BG

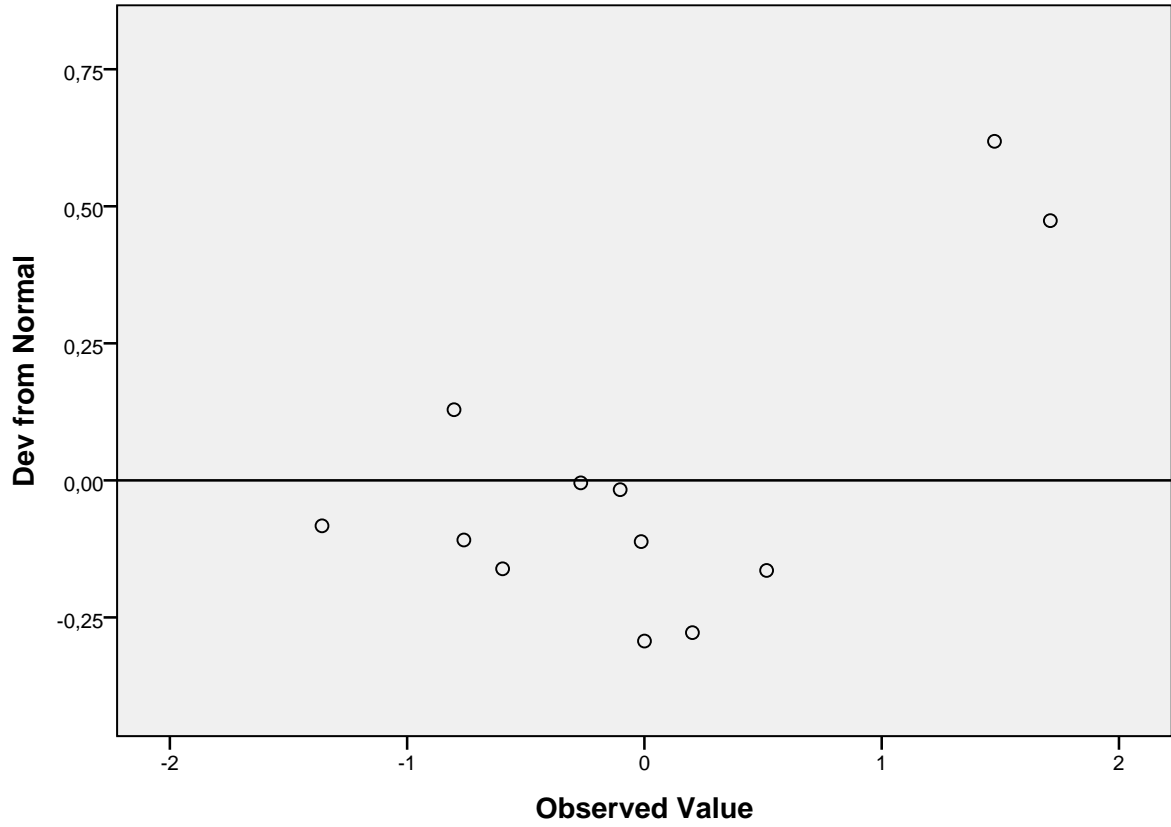

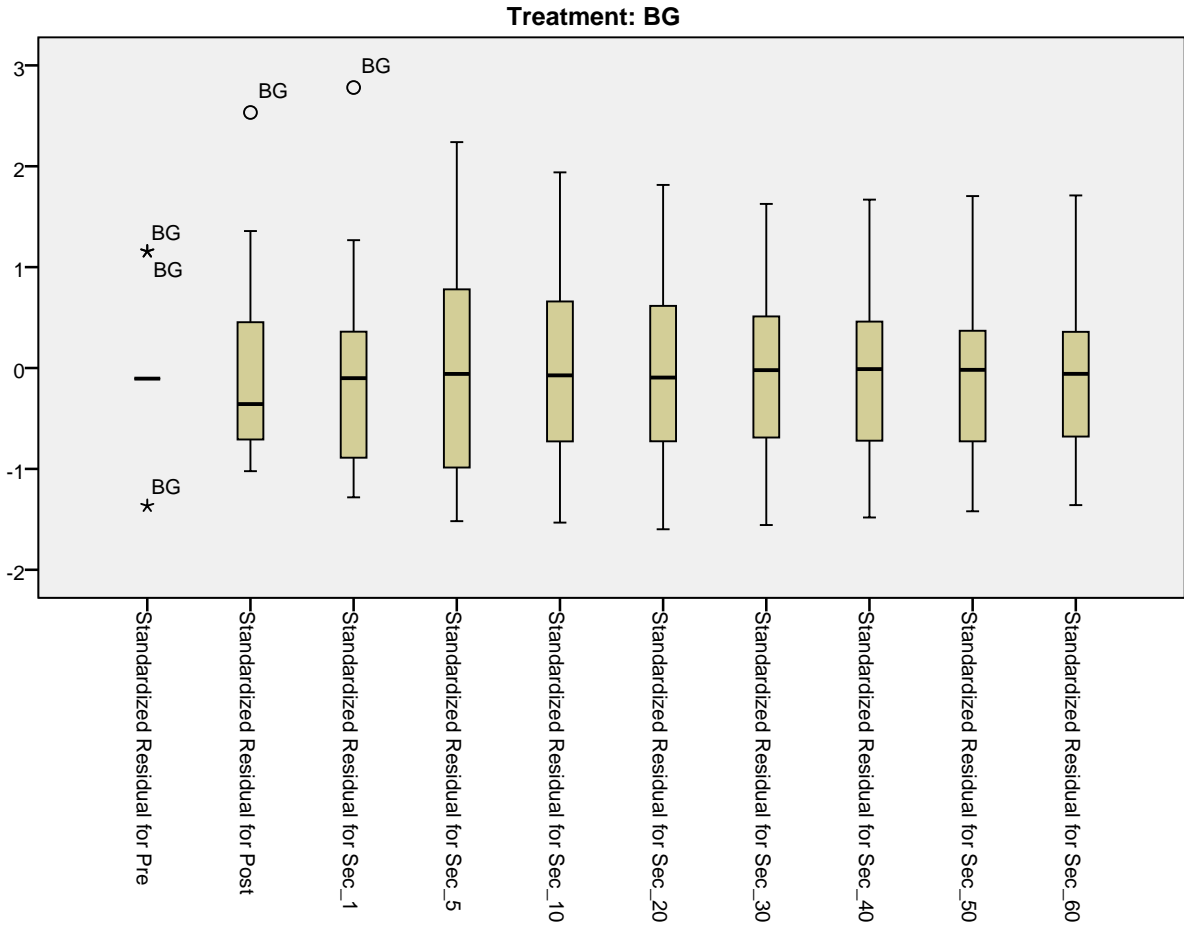

**Normal Q-Q Plots of Standardized Residual for tHb During Recovery**

# Normal Q-Q Plots of Standardized Residual for tHb During Recovery

## Normal Q-Q Plot of Standardized Residual for Pre

Treatment= PLA

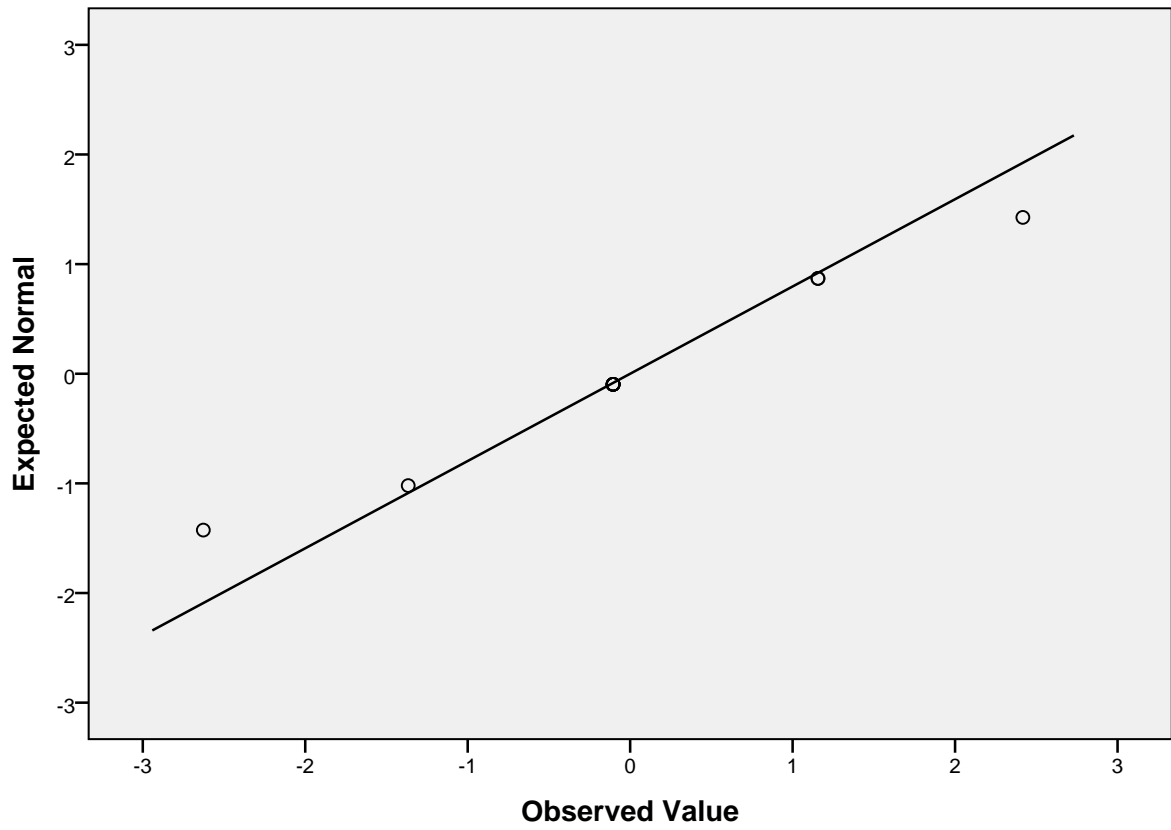

### Normal Q-Q Plot of Standardized Residual for Post

Treatment= PLA

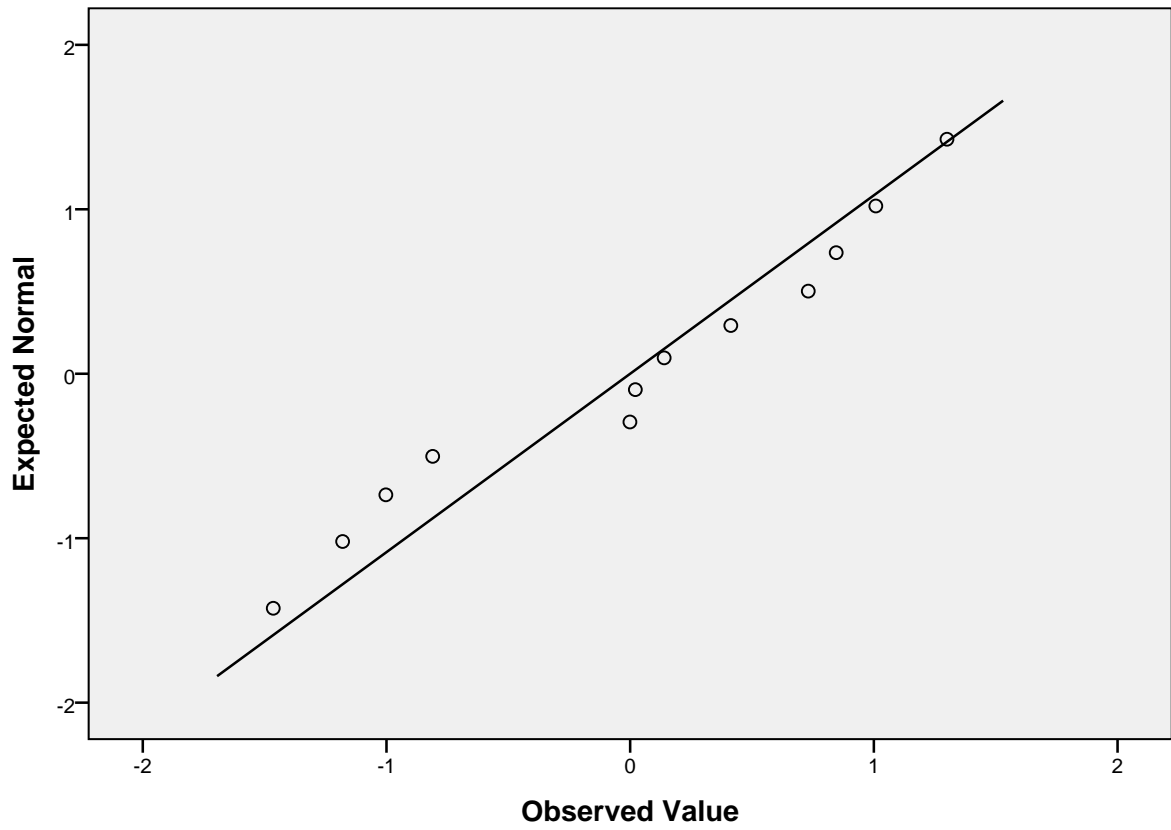

### Normal Q-Q Plot of Standardized Residual for Sec\_1

Treatment= PLA

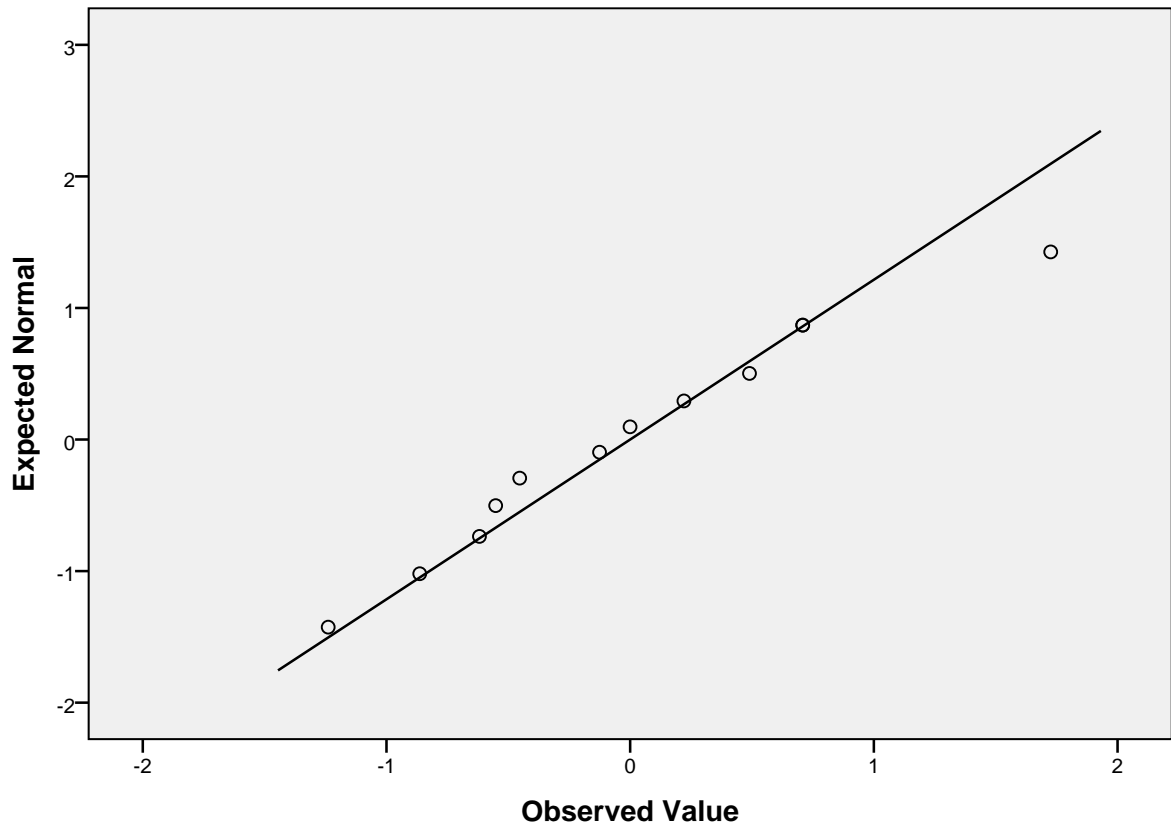

### Normal Q-Q Plot of Standardized Residual for Sec\_5

Treatment= PLA

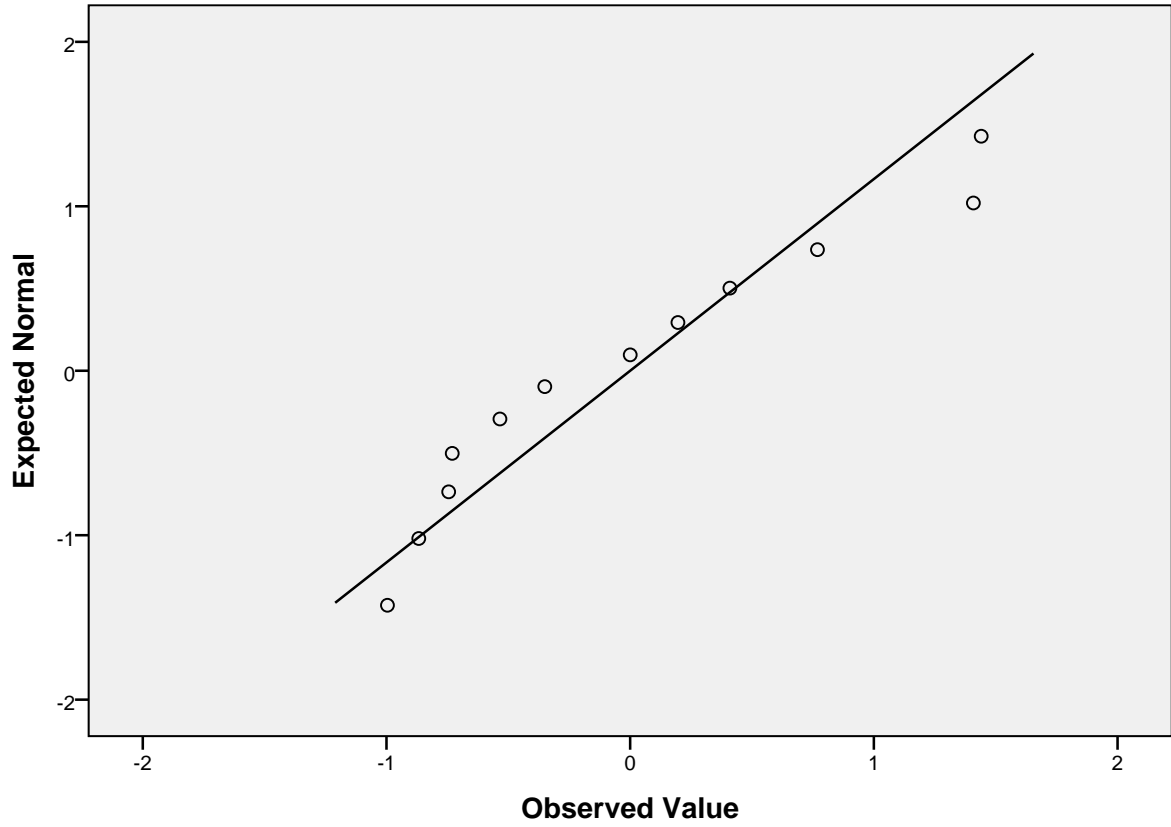

### Normal Q-Q Plot of Standardized Residual for Sec\_10

Treatment= PLA

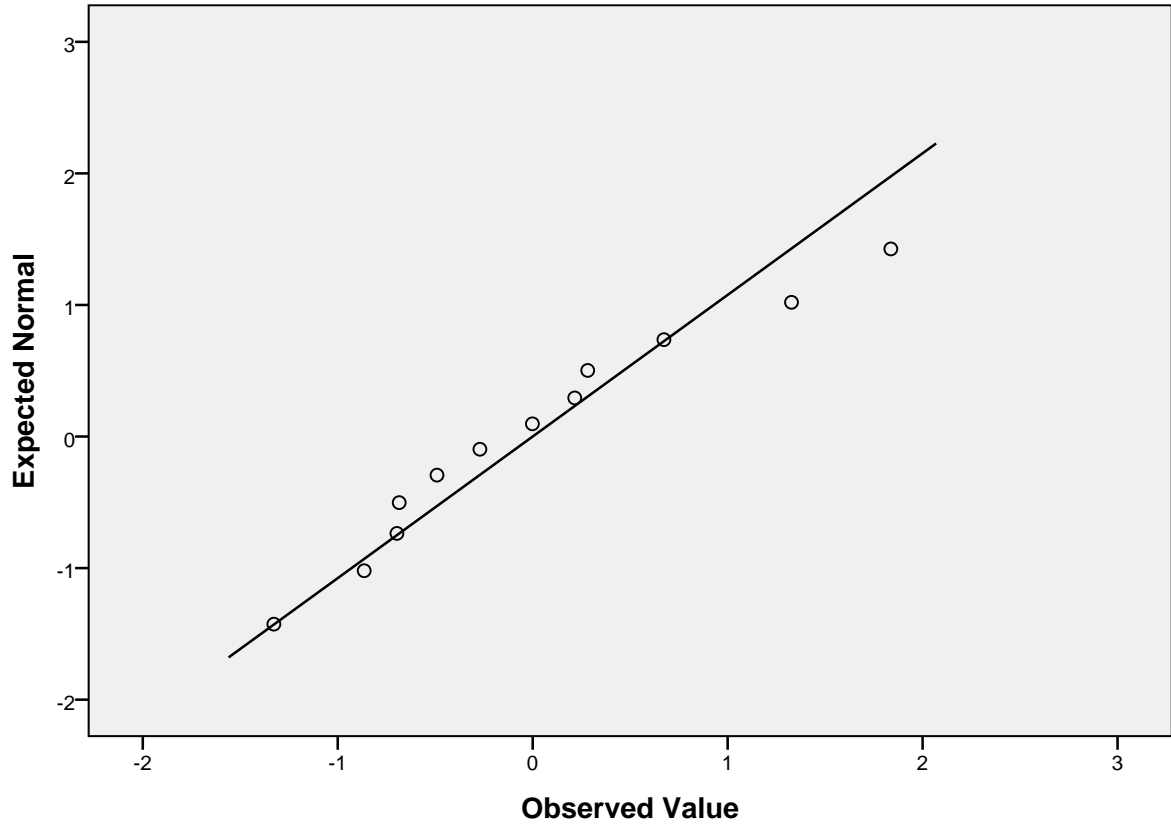



### Normal Q-Q Plot of Standardized Residual for Sec\_20

Treatment= PLA

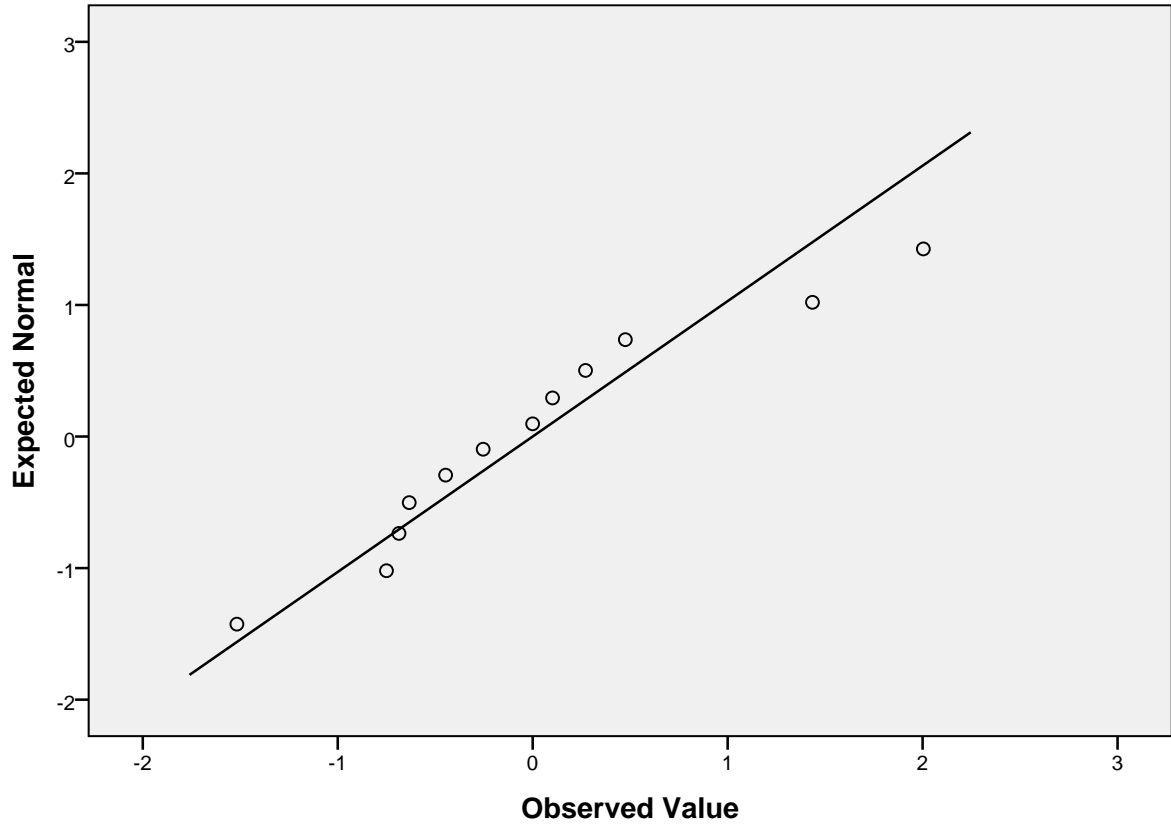

### Normal Q-Q Plot of Standardized Residual for Sec\_30

Treatment= PLA

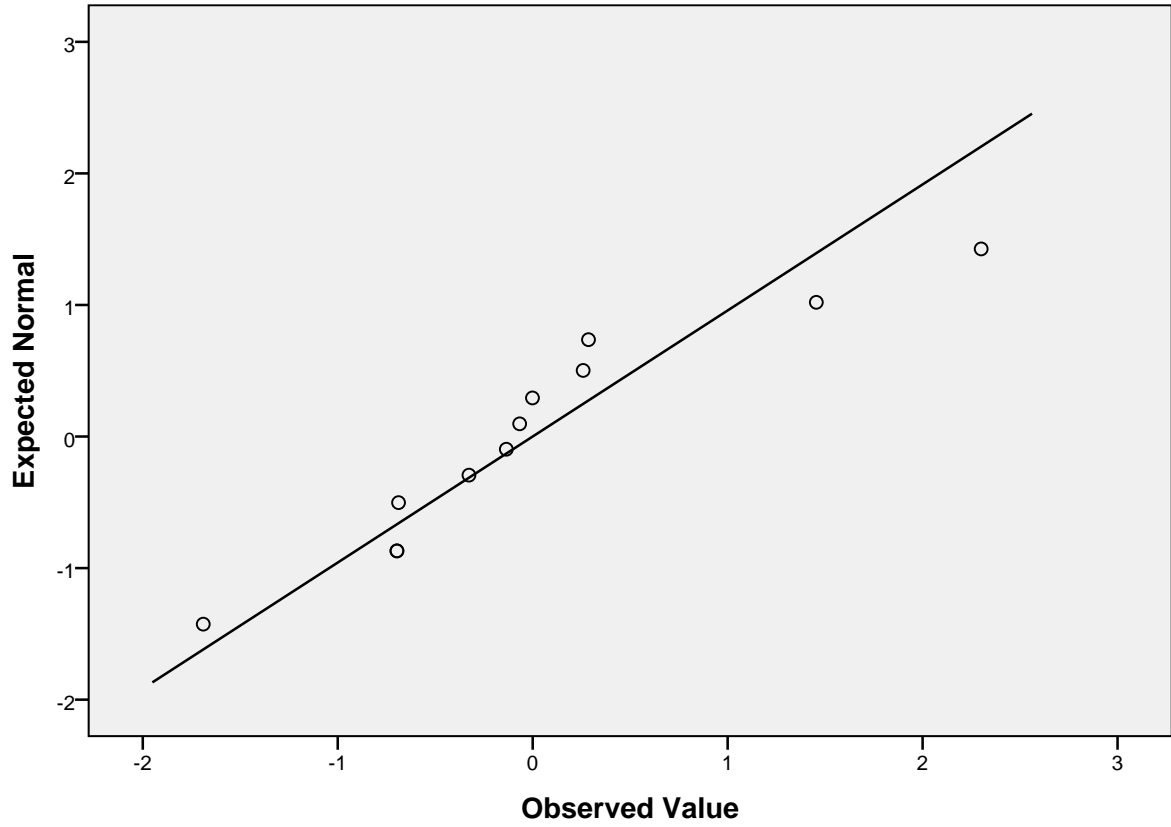

### Normal Q-Q Plot of Standardized Residual for Sec\_40

Treatment= PLA

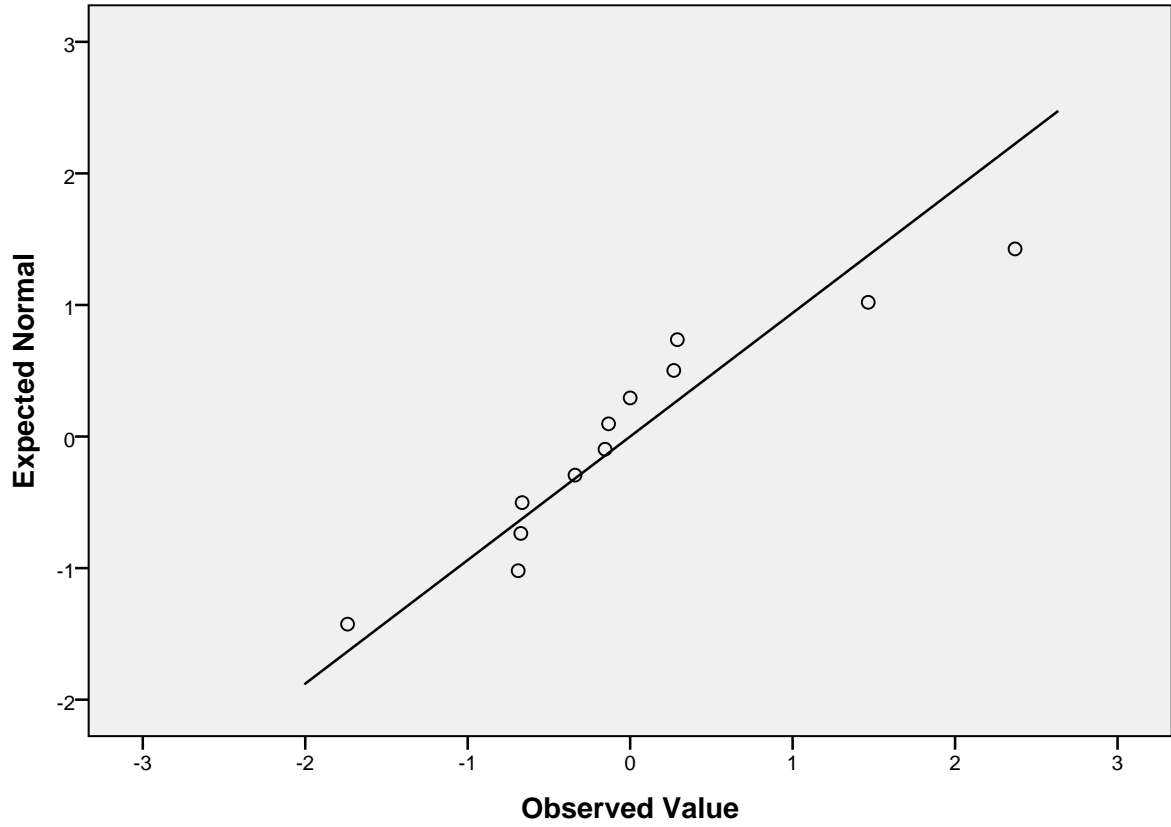

### Normal Q-Q Plot of Standardized Residual for Sec\_50

Treatment= PLA

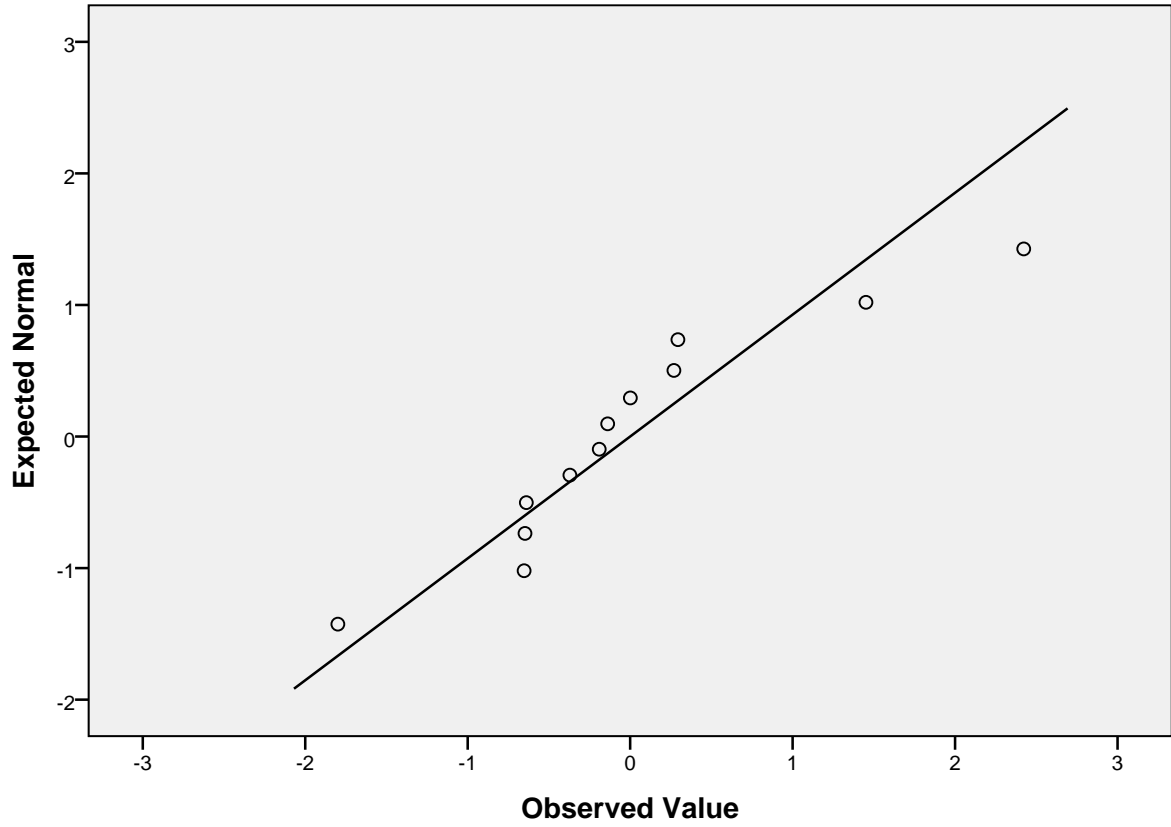

### Normal Q-Q Plot of Standardized Residual for Sec\_60

Treatment= PLA

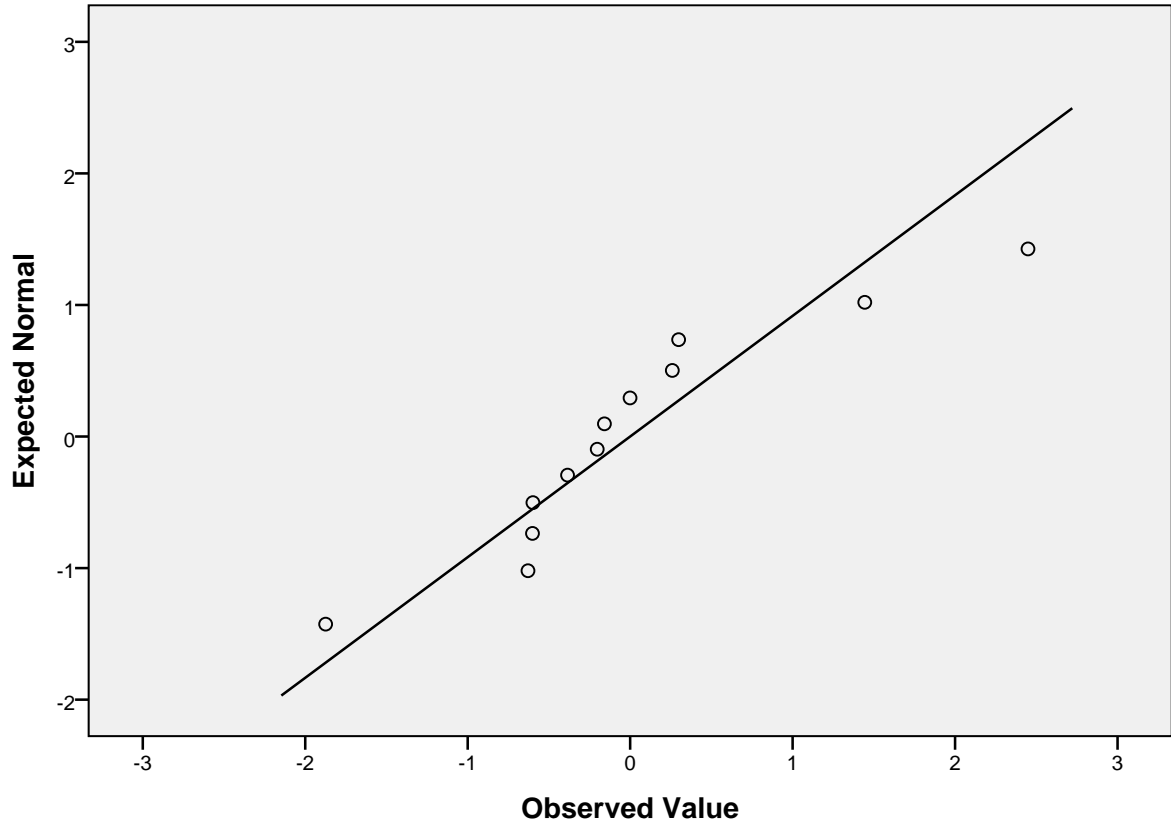

### Detrended Normal Q-Q Plots of Standardized Residual for tHb During Recovery

### Detrended Normal Q-Q Plot of Standardized Residual for Pre

Treatment= PLA

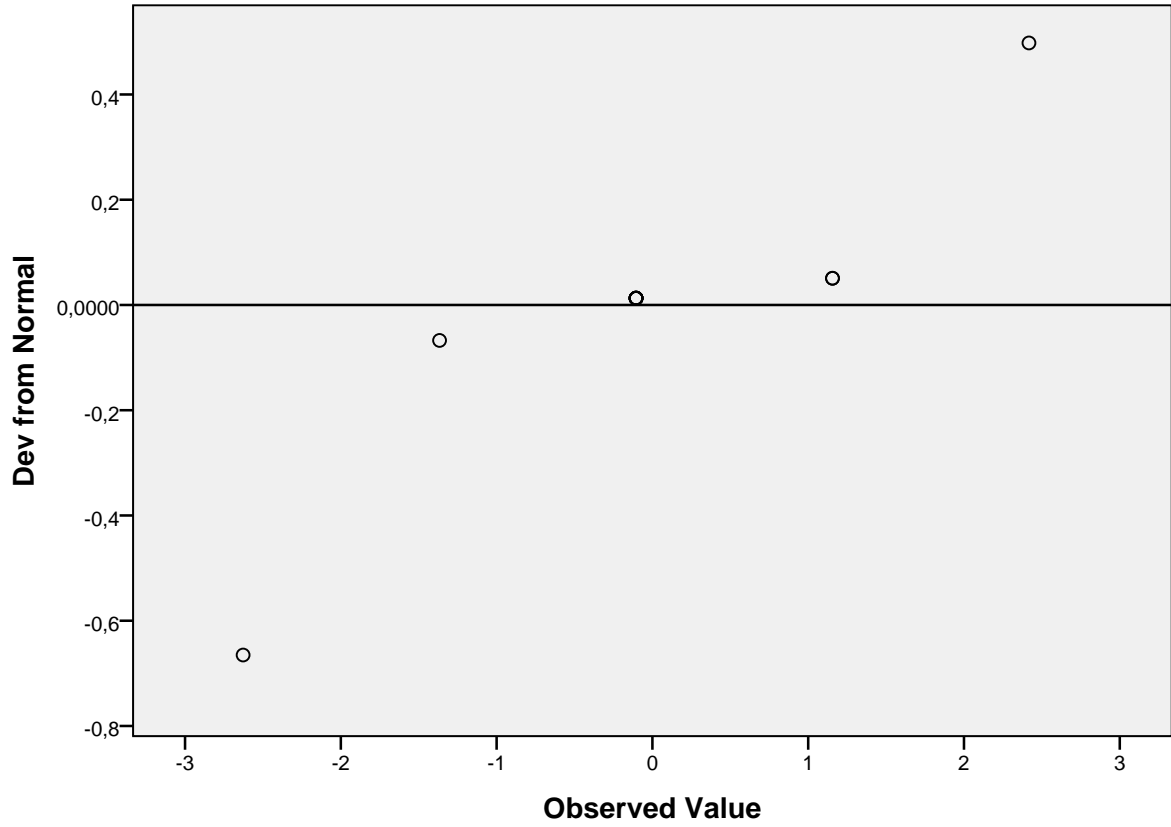

**Detrended Normal Q-Q Plot of Standardized Residual for Post**

Treatment= PLA

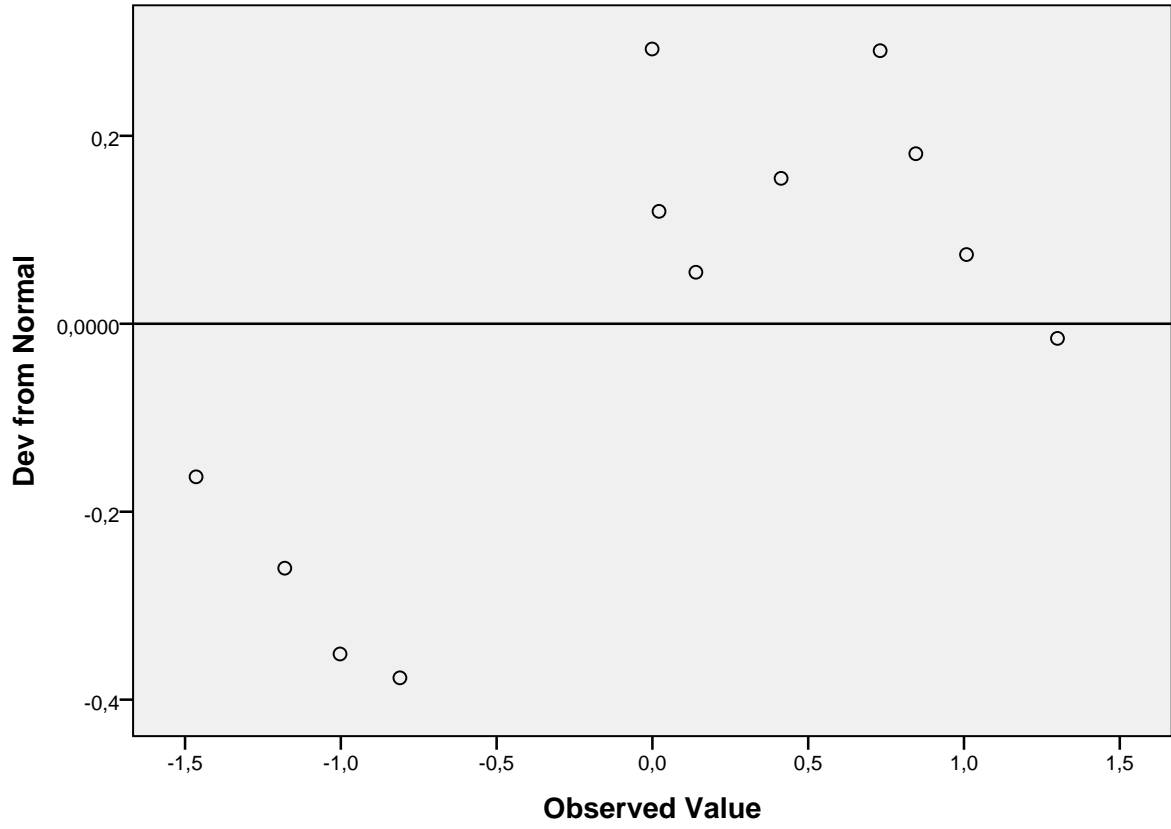

### Detrended Normal Q-Q Plot of Standardized Residual for Sec\_1

Treatment= PLA

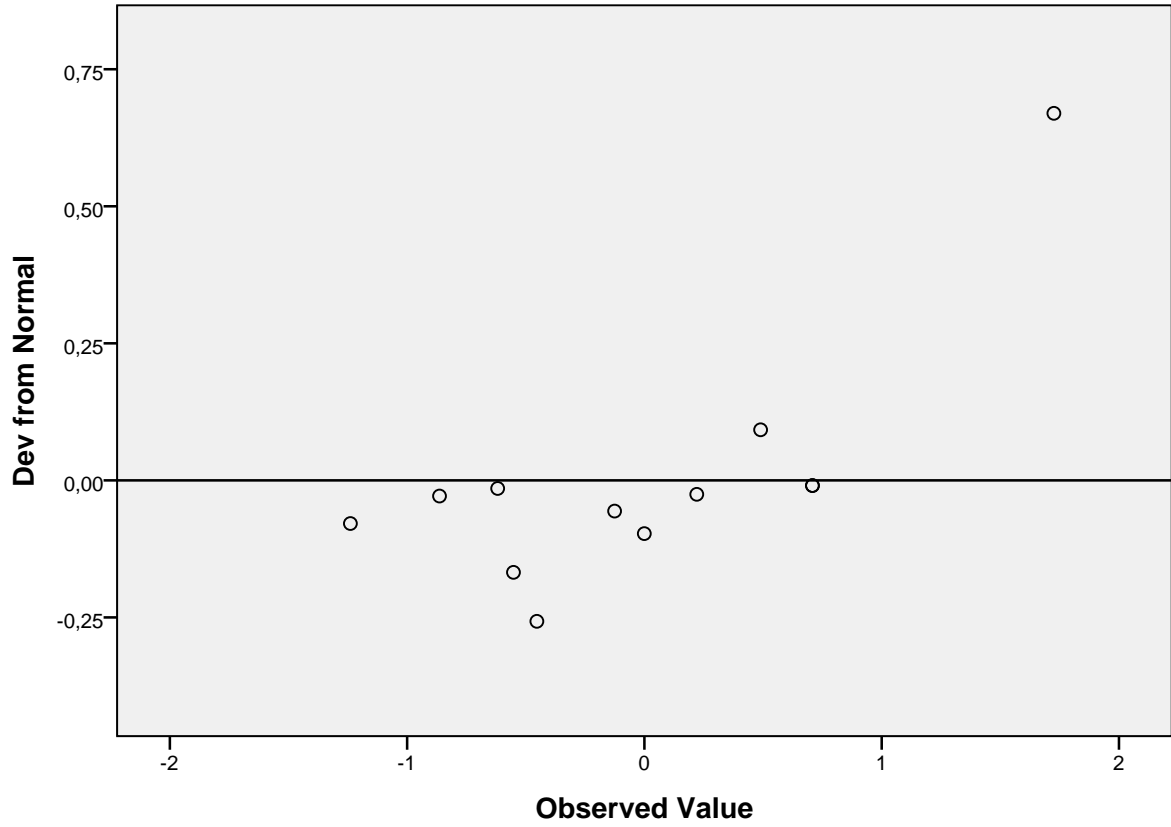



### Detrended Normal Q-Q Plot of Standardized Residual for Sec\_5

Treatment= PLA

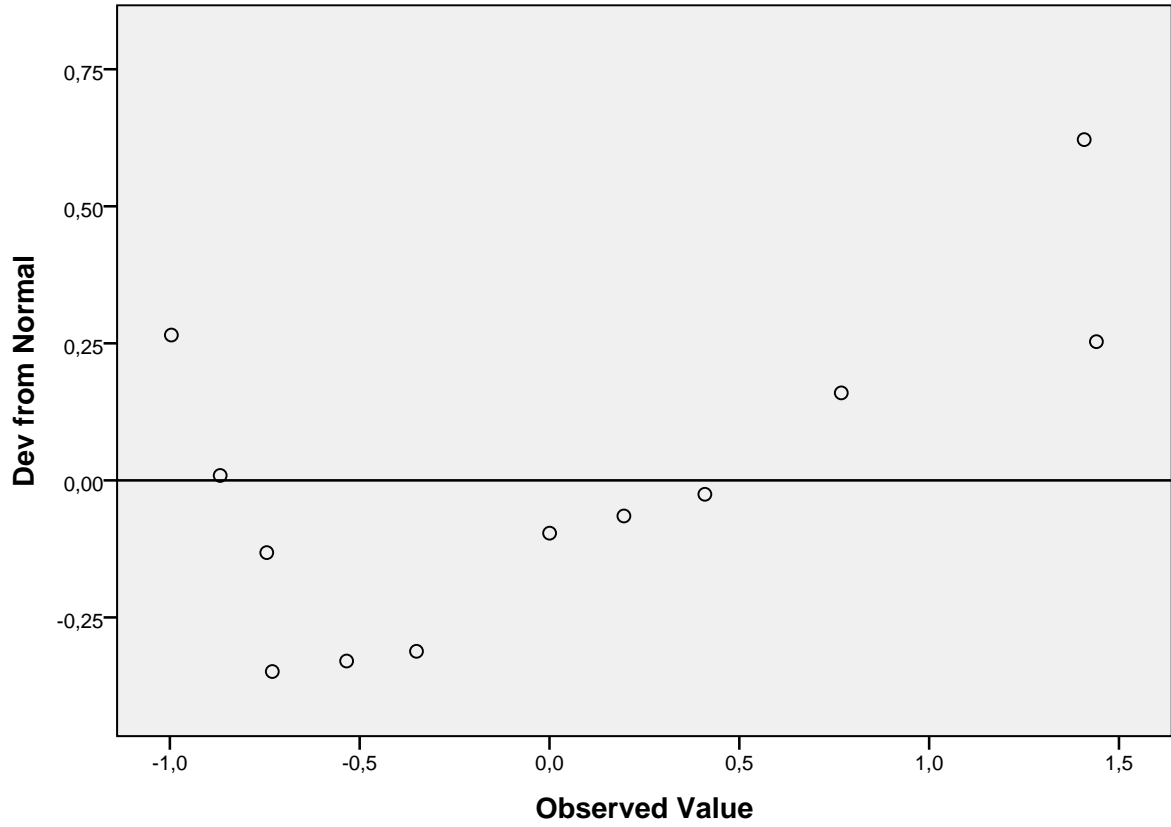

### Detrended Normal Q-Q Plot of Standardized Residual for Sec\_10

Treatment= PLA

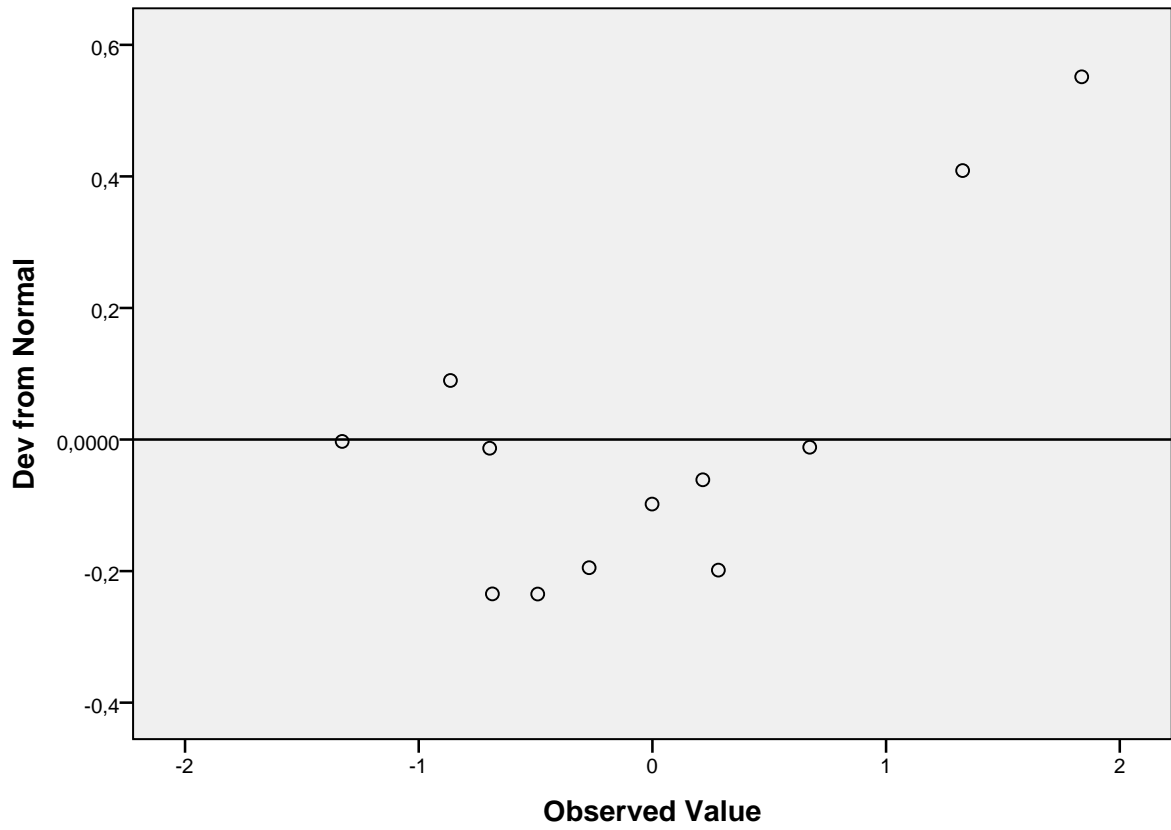

### Detrended Normal Q-Q Plot of Standardized Residual for Sec\_20

Treatment= PLA

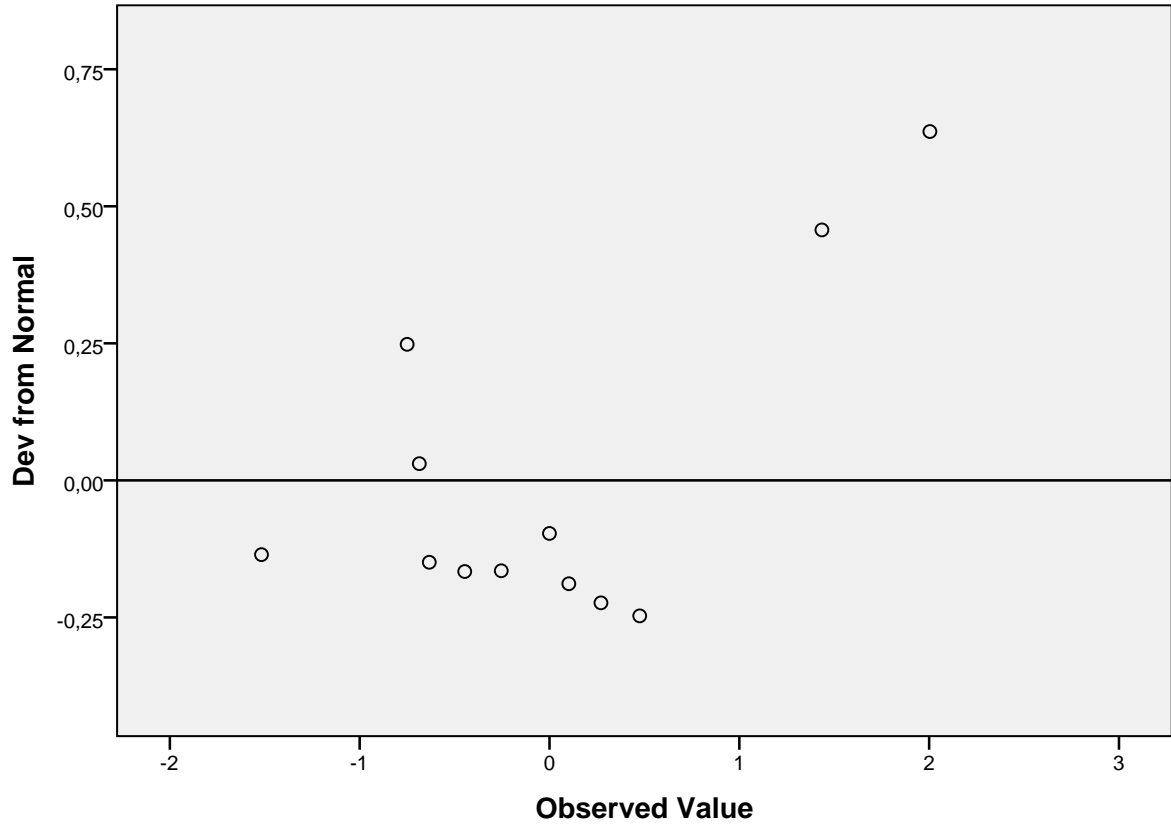

### Detrended Normal Q-Q Plot of Standardized Residual for Sec\_30

Treatment= PLA

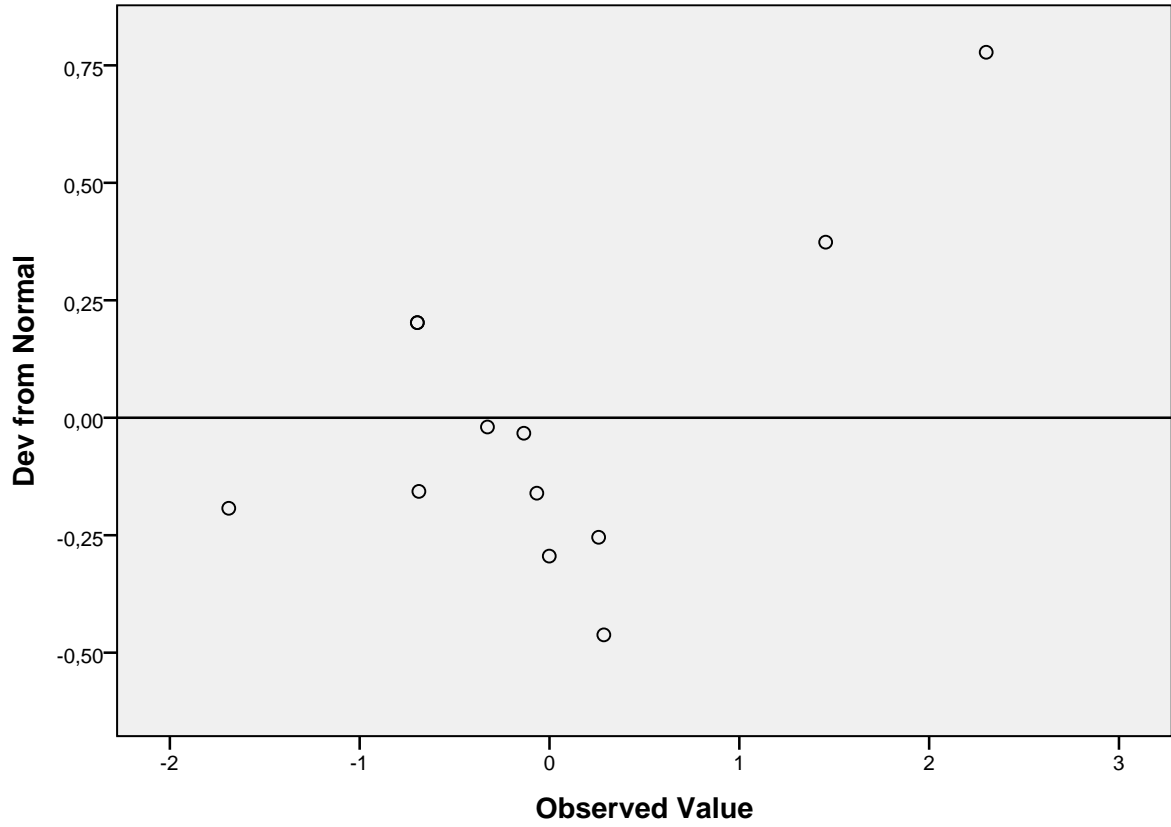

### Detrended Normal Q-Q Plot of Standardized Residual for Sec\_40

Treatment= PLA

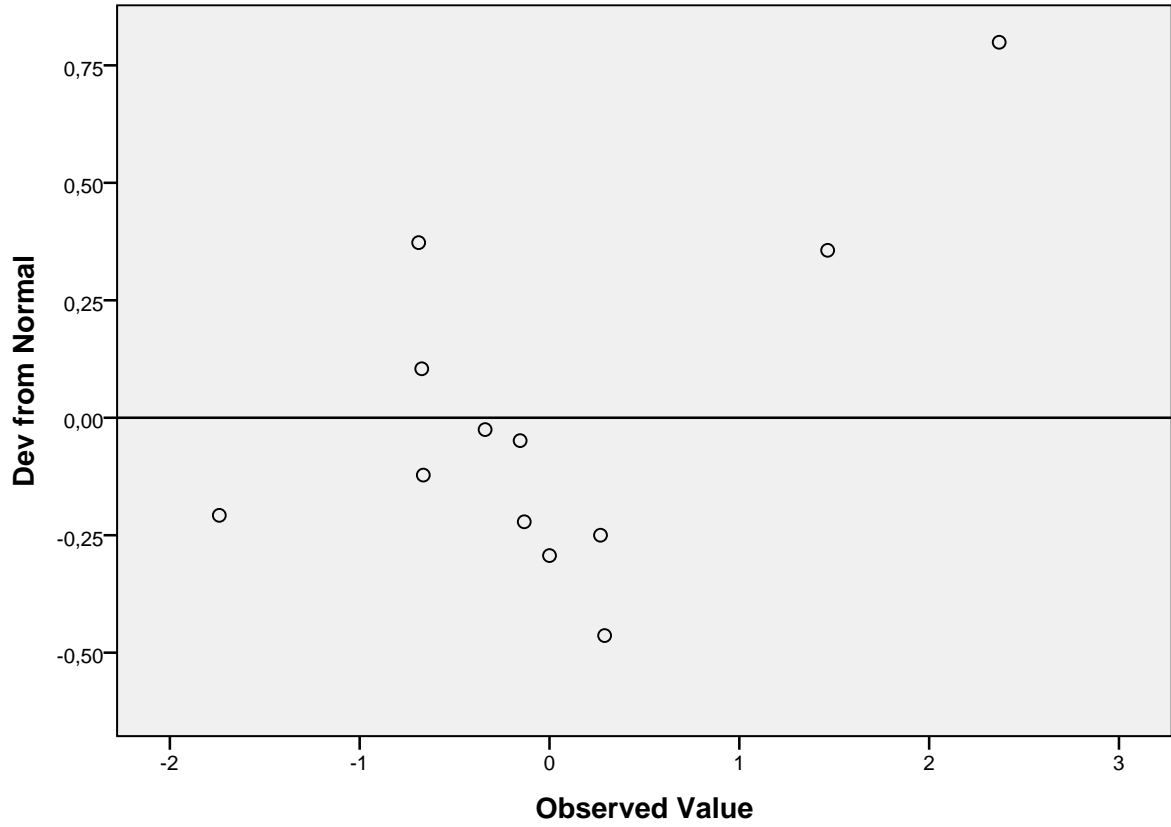

### Detrended Normal Q-Q Plot of Standardized Residual for Sec\_50

Treatment= PLA

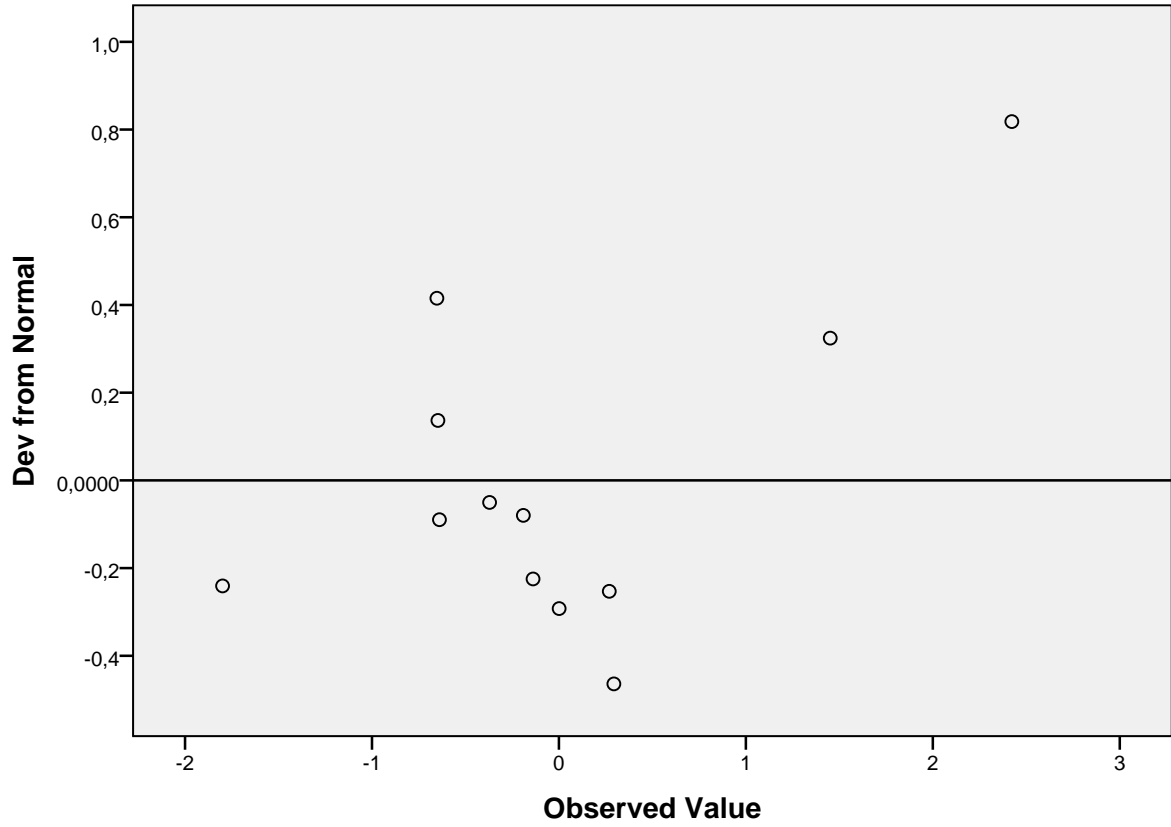

### Detrended Normal Q-Q Plot of Standardized Residual for Sec\_60

Treatment= PLA

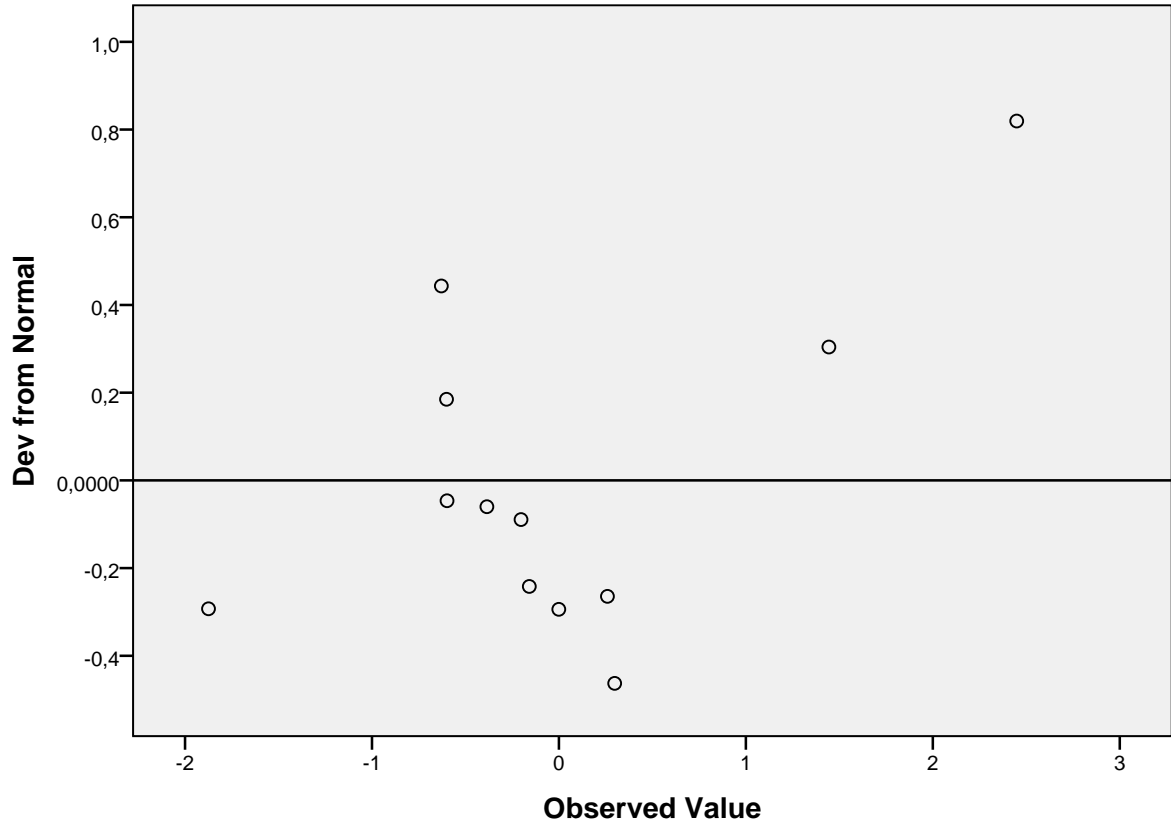

Treatment: PLA

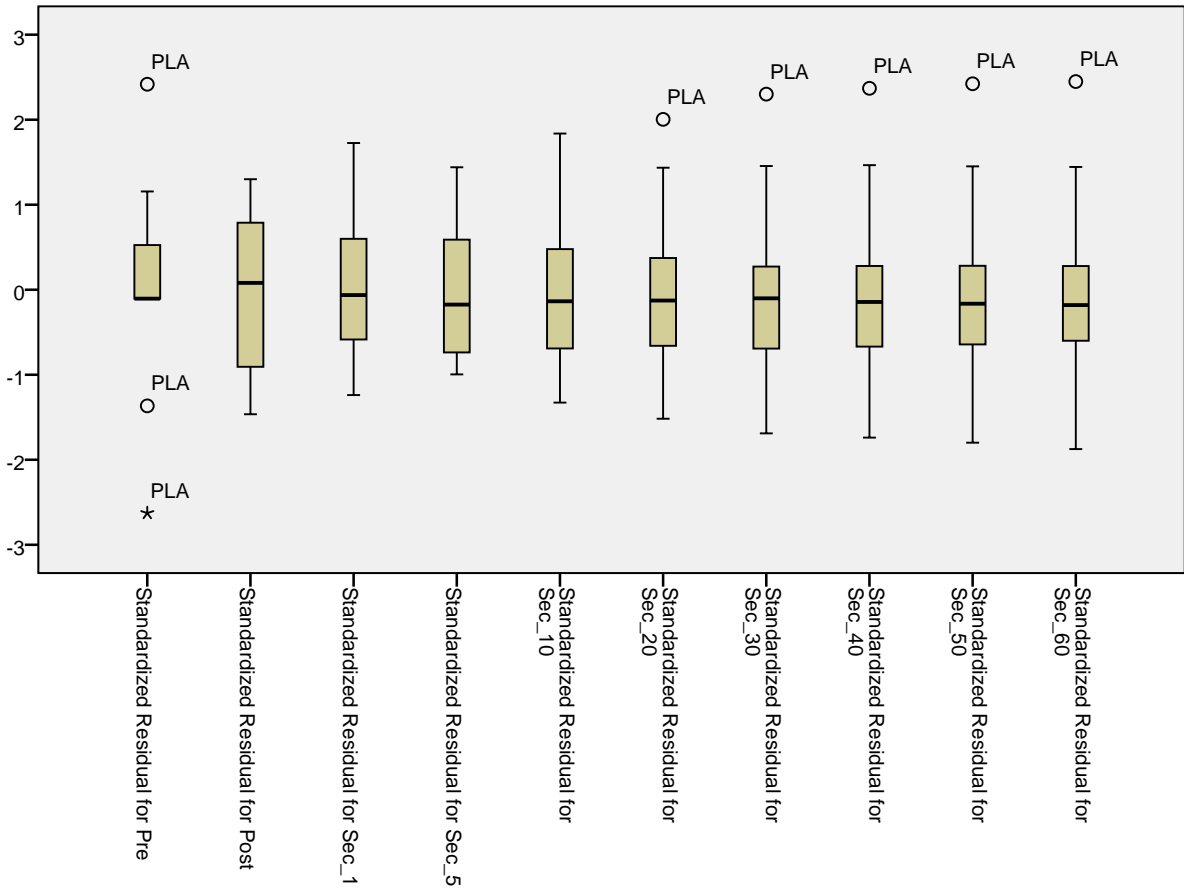

Supplement: pone.0188893.s001.pdf [file pone.0188893.s001.pdf]
